# Supplementary material for: Immune-related long non-coding RNA signature identified prognosis and immunotherapeutic efficiency in bladder cancer (BLCA)
Source: Springer Nature journal article supplement (doi:10.1186/s12935-020-01362-0), 2020-06-26

## 武汉大学中南医院医学伦理委员会科研项目伦理审批件

科伦[2015029]

|       |                                                                                                                                                                                                                                                                                                                                                                                                                                                                                                                                       |               |                    |         |                  |
|-------|---------------------------------------------------------------------------------------------------------------------------------------------------------------------------------------------------------------------------------------------------------------------------------------------------------------------------------------------------------------------------------------------------------------------------------------------------------------------------------------------------------------------------------------|---------------|--------------------|---------|------------------|
| 项目名称  | 泌尿系疾病发病机制及分子诊治的科学研究                                                                                                                                                                                                                                                                                                                                                                                                                                                                                                                   |               |                    |         |                  |
| 申报单位  | 武汉大学中南医院                                                                                                                                                                                                                                                                                                                                                                                                                                                                                                                              |               |                    |         |                  |
| 项目负责人 | 王行环                                                                                                                                                                                                                                                                                                                                                                                                                                                                                                                                   | 科室            | 泌尿外科               |         |                  |
| 课题来源  | 武汉市科技局                                                                                                                                                                                                                                                                                                                                                                                                                                                                                                                                |               |                    |         |                  |
| 审查文件  | 详见附件                                                                                                                                                                                                                                                                                                                                                                                                                                                                                                                                  |               |                    |         |                  |
| 审查类别  | 初始审查                                                                                                                                                                                                                                                                                                                                                                                                                                                                                                                                  | 审查方式          | 会议审查               |         |                  |
| 审查日期  | 2015-07-29                                                                                                                                                                                                                                                                                                                                                                                                                                                                                                                            | 审查地点          | 中南医院门诊 13 楼 2 号会议室 |         |                  |
| 出席人员  | 实到 10 人                                                                                                                                                                                                                                                                                                                                                                                                                                                                                                                               | 回避 0 人        | 弃权 0 人             |         |                  |
| 投票结果  | 同意 3 票                                                                                                                                                                                                                                                                                                                                                                                                                                                                                                                                | 作必要的修正后同意 7 票 | 作必要的修正后重审 0 票      | 不同意 0 票 | 暂停或终止已经批准的试验 0 票 |
| 审查意见  | <p>经本伦理委员会审查，审查决定如下：<br/> <input type="checkbox"/>同意    <input checked="" type="checkbox"/>作必要的修正后同意    <input type="checkbox"/>作必要的修正后重审<br/> <input type="checkbox"/>不同意    <input type="checkbox"/>终止或暂停已批准的试验</p> <div style="text-align: right; margin-top: 20px;"> 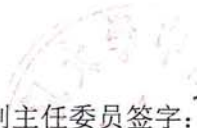<br/>                     主任委员或副主任委员签字: <i>王行环</i><br/>                     武汉大学中南医院医学伦理委员会 (盖章): <i>2015-7-31</i><br/>                     日期: <i>2015-7-31</i> </div> |               |                    |         |                  |
| 注意事项: | <p>1. 请遵循 CFDA/GCP 原则和《赫尔辛基宣言》、遵循本伦理委员会批准的方案开展临床研究，保护受试者的健康与权利。</p> <p>2. 研究过程中，对研究方案和知情同意书等相关文件的修改，均须得到伦理委员会审查同意后实施。</p> <p>3. 发生严重不良事件或影响研究风险受益比的非预期不良事件、违背方案、暂停/提前终止研究须及时报告本伦理委员会。</p> <p>4. 根据项目来源类别提交跟踪审查材料。</p>                                                                                                                                                                                                                                                                                                                 |               |                    |         |                  |

伦理委员会声明：本伦理委员会严格按照中国 GCP 及相关法律法规组成及工作。

伦理委员会地址：湖北省武汉市武昌区东湖路 169 号；邮编 430071；电话：027-67812787。

## 复 审 表

|                                                                                                                                                                                                                                                                                                |                                                                                                                                                                                                                                                                                                                                      |           |  |
|------------------------------------------------------------------------------------------------------------------------------------------------------------------------------------------------------------------------------------------------------------------------------------------------|--------------------------------------------------------------------------------------------------------------------------------------------------------------------------------------------------------------------------------------------------------------------------------------------------------------------------------------|-----------|--|
| 项 目                                                                                                                                                                                                                                                                                            | 泌尿系疾病发病机制及分子诊治的科学研究                                                                                                                                                                                                                                                                                                                  |           |  |
| 申办者                                                                                                                                                                                                                                                                                            |                                                                                                                                                                                                                                                                                                                                      |           |  |
| 方案版本号                                                                                                                                                                                                                                                                                          |                                                                                                                                                                                                                                                                                                                                      | 方案版本日期    |  |
| 知情同意书版本号                                                                                                                                                                                                                                                                                       |                                                                                                                                                                                                                                                                                                                                      | 知情同意书版本日期 |  |
| 研究专业/PI                                                                                                                                                                                                                                                                                        | 王行环/泌尿外科                                                                                                                                                                                                                                                                                                                             |           |  |
| <p>审查意见：</p> <p>1.所做修改是否符合上次审查意见<br/> <input checked="" type="checkbox"/>是    <input type="checkbox"/>否</p> <p>2.是否需要进一步修正<br/> <input type="checkbox"/>是    <input checked="" type="checkbox"/>否</p> <p>3.是否提交会议审查<br/> <input type="checkbox"/>是    <input checked="" type="checkbox"/>否</p> |                                                                                                                                                                                                                                                                                                                                      |           |  |
| 主审委员审查意见                                                                                                                                                                                                                                                                                       | <input checked="" type="checkbox"/> 同意 <input type="checkbox"/> 作必要的修正后同意 <input type="checkbox"/> 作必要的修正后重审<br><input type="checkbox"/> 不同意 <input type="checkbox"/> 终止或暂停已批准的试验<br><br>建议： _____<br>_____<br>_____<br><br>主审委员签名：  日期： 2016.2.3 |           |  |
| <p>医学伦理委员会评审结果：</p> <input checked="" type="checkbox"/> 同意 <input type="checkbox"/> 作必要的修正后同意 <input type="checkbox"/> 作必要的修正后重审<br><input type="checkbox"/> 不同意 <input type="checkbox"/> 终止或暂停已批准的试验                                                                                          |                                                                                                                                                                                                                                                                                                                                      |           |  |
| 主任委员或副主任委员签名/日期                                                                                                                                                                                                                                                                                |   2016.2.3                                                                                                                                                     |           |  |

## 武汉大学中南医院医学伦理委员会审查资料目录

项目名称：泌尿系疾病发病机制及分子诊治的科学研究

1. 伦理审查申请表
2. 项目申请书
3. 质量管理方案
4. 伦理流程
5. 知情同意书
6. 湖北省人体器官捐献登记表
7. 证明书
8. 研究者简历

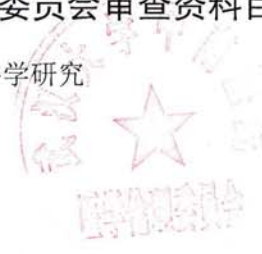

Supplement: MOESM1 [file 18123348]
