# Supplementary material for: Immune-related long non-coding RNA signature identified prognosis and immunotherapeutic efficiency in bladder cancer (BLCA)
Source: Cancer Cell Int. 2020 Jun 26;20:276. doi: 10.1186/s12935-020-01362-0 (PMC7320553; doi:10.1186/s12935-020-01362-0)
Supplement: Supplementary file 8 — Additional file 8: Table S3. Summary of ssGSEA scores for hallmark gene sets in TCGA-BLCA cohort. [file 12935_2020_1362_MOESM8_ESM.xlsx]

## Sheet: ssGSEA_output
	HALLMARK	TCGA.2F.A9KO.01	TCGA.2F.A9KP.01	TCGA.2F.A9KQ.01	TCGA.2F.A9KR.01	TCGA.2F.A9KT.01	TCGA.2F.A9KW.01	TCGA.4Z.AA7M.01	TCGA.4Z.AA7N.01	TCGA.4Z.AA7O.01	TCGA.4Z.AA7Q.01	TCGA.4Z.AA7R.01	TCGA.4Z.AA7S.01	TCGA.4Z.AA7W.01	TCGA.4Z.AA7Y.01	TCGA.4Z.AA80.01	TCGA.4Z.AA81.01	TCGA.4Z.AA82.01	TCGA.4Z.AA83.01	TCGA.4Z.AA84.01	TCGA.4Z.AA86.01	TCGA.4Z.AA87.01	TCGA.4Z.AA89.01	TCGA.5N.A9KI.01	TCGA.5N.A9KM.01	TCGA.BL.A0C8.01	TCGA.BL.A13I.01	TCGA.BL.A13J.01	TCGA.BL.A3JM.01	TCGA.BL.A5ZZ.01	TCGA.BT.A0S7.01	TCGA.BT.A0YX.01	TCGA.BT.A20J.01	TCGA.BT.A20N.01	TCGA.BT.A20O.01	TCGA.BT.A20P.01	TCGA.BT.A20Q.01	TCGA.BT.A20R.01	TCGA.BT.A20T.01	TCGA.BT.A20U.01	TCGA.BT.A20V.01	TCGA.BT.A20W.01	TCGA.BT.A20X.01	TCGA.BT.A2LA.01	TCGA.BT.A2LB.01	TCGA.BT.A2LD.01	TCGA.BT.A3PH.01	TCGA.BT.A3PJ.01	TCGA.BT.A3PK.01
HALLMARK_ADIPOGENESIS	HALLMARK_BILE_ACID_METABOLISM	0.040907	-0.0994821	0.0793949	-0.060472	-0.12113	0.00103729	-0.0150344	-0.0556466	-0.0275909	0.0378179	-0.0271557	0.00734532	-0.00193483	-0.124149	0.0213586	-0.125897	-0.0642488	0.0556295	0.0161408	-0.0727701	-0.020455	-0.013532	0.027323	0.0953345	0.0892303	-0.115857	0.119932	0.0644109	-0.0112611	-0.0833944	-0.0544963	-0.0476445	-0.15956	-0.143125	-0.0329042	-0.036281	0.039739	0.0274578	-0.0821311	-0.0540986	0.00417882	-0.154313	-0.186832	-0.114405	-0.0150417	-0.0791039	-0.0488481	-0.0739088
HALLMARK_ALLOGRAFT_REJECTION	HALLMARK_CHOLESTEROL_HOMEOSTASIS	0.197603	0.146592	0.150557	0.189243	0.123632	0.0928484	0.166062	0.139274	0.117806	0.0952739	0.100291	0.149671	0.153045	0.149642	0.0923885	0.0353835	0.178052	0.179164	0.168857	-0.0163736	0.150412	0.067667	0.279031	0.256055	0.112909	0.0234915	0.137787	-0.0246284	0.00308924	0.068027	0.190163	0.140438	0.1484	0.0472934	0.206782	0.171184	0.189262	0.210625	0.070754	0.178159	0.147809	0.0742917	-0.211041	0.116489	0.15943	0.192108	0.0886761	0.0318252
HALLMARK_ANDROGEN_RESPONSE	HALLMARK_FATTY_ACID_METABOLISM	0.0284159	0.0343967	0.11587	0.0295535	-0.0889459	0.141867	0.00962361	-0.0462242	0.0464289	-0.037039	0.108798	0.111589	-0.00116216	0.0518788	0.0588843	-0.0801563	-0.00894283	0.0471248	0.0322257	-0.0502833	0.153318	0.0800447	0.150499	0.167946	0.184306	0.0881409	0.0526378	0.0519183	0.0547928	0.166769	0.116839	-0.0287586	0.0473565	0.0473165	0.0647078	0.000833647	0.0841008	0.0362515	0.0548778	-0.0582317	0.0791028	-0.00281879	-0.0675413	0.117006	-0.0261861	0.0135031	-0.0743693	-0.0173507
HALLMARK_ANGIOGENESIS	HALLMARK_GLYCOLYSIS	0.00171226	0.144658	0.168877	0.103512	0.152123	0.164103	0.130751	-0.00651675	0.114464	0.122041	0.135407	0.19225	0.120959	0.225637	0.166106	0.151574	0.138433	0.154512	0.153673	0.10711	0.130721	0.130955	0.221893	0.186167	0.182709	0.102836	0.161031	0.0769317	0.116729	0.0498603	0.197455	0.169817	0.170563	0.0814142	0.136104	0.158389	0.204319	0.127954	0.197591	0.149445	-0.012109	0.137424	-0.00753183	0.1586	0.137891	0.211516	0.1435	0.150324
HALLMARK_APICAL_JUNCTION	HALLMARK_HEME_METABOLISM	-0.051555	-0.0334884	0.0464119	-0.0498452	0.0323554	0.0434639	-0.0776127	0.0503295	-0.0109552	0.033906	-0.0117317	0.0401642	0.000362325	0.0119827	0.00019845	0.024081	0.0108486	0.0101525	-0.00227452	0.0314959	-0.0112097	-0.0595114	0.0584761	0.0498666	0.164523	0.0316148	0.0566494	0.0592902	0.0534691	0.0364258	0.0763356	-0.00496334	0.053436	0.0494159	0.00379894	-0.0051275	0.0314325	-0.0258797	0.0456746	0.0400393	0.0148105	0.0630658	0.0421235	0.0188984	0.0643853	0.0713896	0.0263223	0.00518579
HALLMARK_APICAL_SURFACE	HALLMARK_PEROXISOME	0.117381	0.150609	0.098146	0.163852	0.0998484	0.082329	0.0987482	0.122741	0.0501542	0.127495	0.158407	0.191259	0.120827	0.155683	0.197734	0.166457	0.116918	0.199483	0.140591	0.0661985	0.200627	0.146503	0.143288	0.261919	0.127529	0.0566208	0.0886727	0.0672466	0.135011	0.150468	0.0919197	0.0659695	0.215571	0.00756761	0.159718	0.132647	0.110932	0.151456	0.0600835	0.0597199	0.0620764	0.175121	0.173761	0.0560353	0.147821	0.249564	0.0906543	0.11433
HALLMARK_APOPTOSIS	HALLMARK_XENOBIOTIC_METABOLISM	0.100654	0.0951842	0.127615	0.0795232	-0.0132915	0.0741022	0.0890967	0.00672747	0.0350903	0.0603735	0.12615	0.128312	0.00334215	0.142375	0.139105	-0.0396955	-0.0808203	0.11103	-0.0524056	-0.091966	0.101382	0.10236	0.155145	0.113444	0.122744	0.0410016	0.0164377	0.000419881	0.111479	-0.0349616	0.119079	-0.0977826	0.0480741	0.0280904	0.139721	0.108483	0.0576652	0.106024	0.0648342	0.00128116	0.134702	-0.0634118	-0.101799	0.104144	0.040817	0.105257	-0.0270873	-0.00415387
HALLMARK_BILE_ACID_METABOLISM	HALLMARK_ANDROGEN_RESPONSE	0.0808094	0.0905728	0.119864	-0.0296057	0.0467249	0.095108	0.00296413	0.139187	0.0601231	0.0327307	0.0812392	0.0728667	-0.00300543	0.173347	0.152646	0.0385213	0.0475422	0.076637	0.0279185	0.0728513	0.048144	0.0262837	0.125682	0.167626	0.0998112	0.124261	0.0806383	-0.0280394	0.0574759	0.0599564	0.131588	0.126292	0.123239	0.135488	0.0460084	0.159194	0.114593	0.0648152	0.128918	0.0141299	0.108974	0.070715	-0.0338357	0.0796273	0.0560079	0.141286	0.0310492	0.0323692
HALLMARK_COAGULATION	HALLMARK_ESTROGEN_RESPONSE_EARLY	0.0210102	0.128942	0.0934212	0.0786546	0.0934166	0.0921111	0.10231	0.189772	0.100995	0.102794	0.0380021	0.137288	0.0729058	0.169768	0.10482	0.135258	0.111766	0.141284	0.0717352	0.0519454	0.071176	0.0986921	0.0963086	0.154812	0.140967	-0.0346173	0.096343	0.0824963	0.0274954	0.0129916	0.0738569	0.00409835	0.162131	-0.0675617	0.00562396	0.17072	0.115164	0.0996323	0.140377	0.0861926	0.198198	0.00752501	0.0276545	0.128458	0.0731104	0.0819572	0.0679934	0.0476271
HALLMARK_COMPLEMENT	HALLMARK_ESTROGEN_RESPONSE_LATE	0.158031	0.132235	0.242878	0.172936	0.0823781	-0.0385716	0.14825	0.155559	0.218178	0.157625	0.174192	0.312143	0.13505	0.192026	0.155277	0.200877	0.158989	0.203178	0.0860876	0.15718	0.0281316	0.188139	0.188356	0.171096	0.0515161	-0.0738958	0.195722	0.0399269	0.0808784	0.11582	0.249142	0.160645	0.212508	-0.036467	0.253895	0.226374	0.191889	0.157749	0.193016	0.210571	0.176821	0.140577	0.0252048	0.135251	0.136063	0.186634	0.0994305	0.171794
HALLMARK_E2F_TARGETS	HALLMARK_SPERMATOGENESIS	-0.0255694	0.0516122	0.00872695	0.025119	0.0393883	0.0714208	0.0430878	-0.0400809	0.0068417	0.100648	0.0749483	0.0423407	0.0531635	-0.00899569	0.0655651	0.00815818	0.0123195	-0.0436533	0.100566	-0.0282689	0.0796622	-0.0656704	0.0201862	0.00791327	0.0358978	0.091918	0.0844894	0.0786727	0.0355964	0.0604696	-0.00206135	0.140178	0.0497649	0.0282482	0.0354014	-0.0454968	0.0388722	-0.0322796	-0.0201093	0.0345351	0.0323353	0.0406537	0.151828	-0.042405	0.0618504	0.0562914	0.0900414	0.059592
HALLMARK_EPITHELIAL_MESENCHYMAL_TRANSITION	HALLMARK_HYPOXIA	0.0630103	0.00713675	0.179896	-0.0265738	0.157165	0.137268	-0.0563495	0.150902	0.0900905	0.0235019	0.0269559	0.146633	0.0308027	0.202993	0.0224742	0.047576	0.182097	0.216457	0.0796053	0.210019	0.00404966	0.0187154	0.110125	0.00987402	0.124563	0.0853481	0.244991	0.047791	0.187632	0.0592871	0.00441333	0.172294	0.0221051	0.105744	0.069236	0.0547084	0.140976	0.062121	0.0448728	0.0727247	0.0197624	0.0766404	-0.00958404	0.185415	0.0391319	0.176869	0.0794775	0.206293
HALLMARK_ESTROGEN_RESPONSE_EARLY	HALLMARK_ANGIOGENESIS	-0.097713	0.106161	-0.0933368	-0.173261	-0.254195	0.28111	-0.279824	0.163211	-0.179907	-0.121681	-0.173405	-0.161191	-0.233762	-0.197683	-0.287153	-0.11559	-0.340794	-0.0288881	-0.0268789	-0.0798191	-0.212951	-0.312083	0.125681	-0.290747	0.10317	0.218982	-0.244207	0.0238424	0.487795	-0.0855492	-0.246845	-0.160763	-0.265384	0.0285471	0.0240486	-0.205386	0.0665009	-0.164134	-0.200294	-0.200314	-0.191178	-0.0793958	-0.112758	0.0311824	0.0556821	-0.170654	-0.254924	0.212275
HALLMARK_FATTY_ACID_METABOLISM	HALLMARK_APICAL_JUNCTION	0.0311297	-0.0110659	0.0870687	0.0746066	0.117126	0.106525	0.0415123	0.233469	0.119071	0.175229	0.0505261	0.0320103	0.136507	0.0620852	-0.00541689	0.123808	0.163215	0.0928652	0.00730933	0.139836	-0.0305128	0.017097	0.148463	0.0103795	0.105707	0.137641	0.116102	-0.0227577	0.303306	0.0741267	0.135478	0.133305	0.0960041	0.10866	0.060912	0.133381	0.154991	0.132283	0.162356	0.082591	0.0672456	0.137171	0.0800007	0.199047	0.193569	0.0750183	0.149957	0.216666
HALLMARK_G2M_CHECKPOINT	HALLMARK_APICAL_SURFACE	0.157447	0.106308	0.0554114	0.0859369	0.119291	-0.048805	0.0359772	0.204486	0.0918529	0.12274	0.0762741	0.09647	0.09046	-0.0222294	0.112833	0.191107	0.16701	0.190232	-0.00123261	0.127863	-0.00594522	0.0832667	0.1989	0.0573907	0.151454	-0.0906906	0.085883	0.0687949	0.11567	0.0232432	-0.0190661	-0.0870091	-0.0698124	0.0108558	0.0502084	0.0412277	0.0607462	0.114266	0.0889774	0.223561	0.187607	0.0305888	0.0467069	0.114886	0.0654572	0.0261166	0.0244135	0.145973
HALLMARK_GLYCOLYSIS	HALLMARK_APOPTOSIS	0.0716579	0.0813589	0.095061	0.121249	0.162577	0.0935636	0.0805183	0.133438	0.0820546	0.0966774	0.0665753	0.0664952	0.085337	0.130725	0.0211701	0.111265	0.181255	0.096914	0.0842737	0.219103	0.0559018	0.116403	0.0854861	0.0752531	0.0187088	0.193184	0.129871	-0.0922252	0.162336	0.0974313	0.0644168	0.0878288	0.0649374	0.23202	0.0922741	0.168792	0.12341	0.207071	0.0410727	0.147656	0.0635204	0.211949	0.112463	0.12596	0.0680244	0.133904	0.228994	0.203652
HALLMARK_HEDGEHOG_SIGNALING	HALLMARK_P53_PATHWAY	0.226355	0.205663	0.29759	0.219167	0.210274	0.15451	0.126006	0.141198	0.196674	0.15532	0.0421678	0.265094	0.216848	0.298662	0.178085	0.23005	0.20954	0.250907	0.0918604	0.173786	0.149797	0.28031	0.152335	0.24269	0.112508	0.111847	0.20162	-0.0267375	0.159176	0.122044	0.303163	0.139284	0.135507	0.120352	0.302171	0.256507	0.0445974	0.21409	0.212201	0.198978	0.118638	0.164214	-0.00403781	0.177465	0.123093	0.22457	0.119314	0.209852
HALLMARK_HEME_METABOLISM	HALLMARK_TNFA_SIGNALING_VIA_NFKB	0.27206	0.18148	0.0587119	0.110759	0.17723	0.242439	-0.0147633	0.418751	0.142279	0.190256	0.0580424	0.111554	0.288296	0.197947	0.188449	0.139415	0.261598	0.298183	0.143153	0.258964	0.051828	0.172315	0.195163	0.146316	-0.047874	0.177715	0.117576	-0.11122	0.355422	0.130963	0.238559	0.154709	0.079672	0.252757	0.139069	0.172528	0.198438	0.269232	0.158215	0.0690969	0.16302	0.272332	-0.0653444	0.267776	0.169467	0.182855	0.210315	0.342746
HALLMARK_HYPOXIA	HALLMARK_IL2_STAT5_SIGNALING	0.127756	0.018743	0.00479982	-0.0789205	-0.0141802	0.0789343	-0.0181685	0.242895	0.10943	0.109949	0.0516476	-0.0275767	0.175089	0.0673598	0.0129102	0.100462	0.0748078	0.0923436	-0.0369784	0.26073	0.0533358	-0.0437197	0.0765664	0.0584834	0.0620498	0.223631	0.0447596	0.0588299	0.283262	0.0163109	0.125744	0.158223	0.0495117	0.290125	0.0497993	0.137123	0.112344	0.0727301	0.0995269	0.0928908	0.154229	0.130234	-0.101352	0.15905	0.0489179	-0.0059592	0.176408	0.203568
HALLMARK_IL2_STAT5_SIGNALING	HALLMARK_IL6_JAK_STAT3_SIGNALING	0.119531	-0.0812703	0.0492402	0.0428772	-0.0517071	0.132091	-0.0561886	0.246143	0.0539032	0.106726	0.0136974	0.0360499	0.112859	0.05978	-0.0128895	-0.0459747	0.235914	0.14549	0.0191971	0.157128	-0.0513217	0.0936504	0.203616	0.0869649	0.145202	0.419947	-0.0044886	0.03082	0.219036	0.0425898	-0.0184462	0.167275	0.00519479	0.365927	0.0832515	0.143872	0.00282048	0.119915	-0.0270344	0.229352	0.250835	0.0940681	-0.222653	0.0901188	0.176056	0.109228	0.128319	0.108949
HALLMARK_IL6_JAK_STAT3_SIGNALING	HALLMARK_INFLAMMATORY_RESPONSE	0.145472	-0.184401	-0.1295	-0.0585726	-0.0369471	0.105351	-0.185314	0.302389	-0.116821	0.167695	-0.16595	-0.077695	0.149337	-0.133073	-0.0470717	-0.0345373	0.0475333	0.00806246	-0.185606	0.286939	-0.0932295	-0.255713	0.0848513	0.00326025	0.0461744	0.289018	-0.171805	-0.263344	0.313878	-0.0936355	0.199313	0.20084	-0.241675	0.342498	-0.179944	0.0307629	0.138615	-0.0939865	0.0603425	0.0228052	0.0305854	0.0879544	-0.11736	0.137402	-0.14143	-0.100626	0.157054	0.342735
HALLMARK_INFLAMMATORY_RESPONSE	HALLMARK_INTERFERON_ALPHA_RESPONSE	0.244672	-0.0623034	-0.000629686	0.167214	-0.114232	0.0985196	-0.0536387	0.081216	0.158906	0.240932	0.00346802	0.00662528	0.306379	0.169777	0.198508	0.318694	0.117736	0.315802	-0.0354074	0.213088	-0.199224	0.250564	0.323084	0.190866	0.150922	0.242596	-0.112358	-0.0405035	-0.0171291	-0.144027	0.280029	0.0506526	-0.0997698	0.389547	0.117803	0.235788	0.127728	0.245227	0.108469	0.0211424	-0.0339657	0.180019	-0.1898	0.192382	0.0852389	-0.103222	0.161848	0.107338
HALLMARK_INTERFERON_ALPHA_RESPONSE	HALLMARK_INTERFERON_GAMMA_RESPONSE	0.416592	-0.0731872	-0.107575	0.0941821	-0.121747	-0.0559842	-0.0708801	0.348358	0.224547	0.407921	-0.116319	-0.087954	0.381897	-0.0317529	0.067542	0.391315	0.188946	0.162195	-0.139494	0.381083	0.0494538	0.130006	0.253325	0.171754	0.0733516	0.273851	-0.0071277	0.0328863	0.0114452	-0.194133	0.148326	0.228158	-0.120502	0.492999	-0.0293237	0.316112	0.212012	0.256164	0.100231	0.0665137	0.14951	0.0738831	-0.219916	0.265994	0.079444	-0.0733754	0.23047	0.201711
HALLMARK_INTERFERON_GAMMA_RESPONSE	HALLMARK_COMPLEMENT	0.117383	-0.068963	-0.0334878	-0.0320509	-0.0359572	0.064968	-0.0567101	0.217162	0.026261	0.194075	-0.0887498	-0.0722245	0.10494	-0.0127602	-0.0198926	0.0321292	0.0689949	-0.0294284	-0.0515984	0.187102	-0.0183052	-0.106981	0.0684205	-0.00561184	0.0619764	0.185885	0.0116966	0.0306201	0.192019	-0.0156178	0.134497	0.197077	0.00109027	0.278305	-0.0765494	0.117507	0.0961706	0.0110732	0.0505933	0.0603038	-0.0484413	0.0597831	-0.000638538	0.0746901	-0.0521467	-0.0394095	0.107756	0.154137
HALLMARK_KRAS_SIGNALING_DN	HALLMARK_EPITHELIAL_MESENCHYMAL_TRANSITION	0.0969653	-0.152846	-0.112304	-0.122884	0.0763762	0.0858939	0.0193396	0.313775	0.0932594	-0.113995	0.0124091	-0.194893	-0.00359062	-0.144113	-0.294117	-0.124967	0.249953	0.00710155	0.0350992	0.324417	-0.109267	-0.231573	0.19705	0.0501959	-0.100507	0.228316	0.246724	0.121253	0.450754	0.131531	-0.0531202	-0.00367115	0.125097	0.345031	-0.122074	0.292245	0.428329	0.265931	0.184173	-0.122943	-0.010456	0.203062	0.0103917	0.267094	0.126696	-0.109335	0.185954	0.319961
HALLMARK_KRAS_SIGNALING_UP	HALLMARK_TGF_BETA_SIGNALING	0.073262	0.0328661	0.147221	0.0614383	0.117664	0.0126844	-0.0460839	0.0846107	0.216585	-0.132419	-0.0513895	0.0849718	-0.0848532	0.110259	-0.0169008	0.138736	0.10316	0.0597926	0.0902113	0.163837	0.0167329	0.110113	-0.076589	0.0202418	0.10143	0.0880293	0.0750852	0.0760544	0.221397	0.0631754	0.0417609	0.0948287	0.0964388	0.0244378	-0.0173227	0.115453	0.0846651	0.0892563	0.19011	0.0284864	0.0835901	0.126574	-0.000548495	0.035696	0.152557	0.135511	0.120292	0.139787
HALLMARK_MITOTIC_SPINDLE	HALLMARK_MYC_TARGETS_V1	0.106096	0.272331	0.154429	0.0515449	0.160144	0.223145	0.12622	-0.0638983	0.232813	0.182275	0.155669	0.221215	0.296839	0.1799	0.219056	0.330295	0.193199	0.103544	0.267083	0.12724	0.343432	0.23314	0.133077	0.159479	0.0174802	0.315724	0.157999	0.251511	0.219	0.365223	0.239074	0.275379	0.291761	0.201797	0.159233	0.0815315	0.106927	0.196764	0.3222	0.214644	0.219908	0.287575	0.185208	0.184352	0.19952	0.223992	0.241837	0.173927
HALLMARK_MTORC1_SIGNALING	HALLMARK_MYC_TARGETS_V2	0.12731	0.392241	0.108285	0.111087	0.256463	0.296635	0.121218	-0.120757	0.132978	0.120678	0.186663	0.116658	0.251891	0.0926092	0.272813	0.311341	0.318719	0.201501	0.36066	0.172558	0.286941	0.195813	0.0749389	0.0400197	-0.0973526	0.358621	-0.00689135	0.272244	0.23044	0.293332	0.266728	0.288276	0.338833	0.28043	0.149744	-0.0043103	0.00895502	0.22012	0.37753	0.215019	0.247487	0.394383	0.195919	0.270456	0.154458	0.15709	0.270725	0.23922
HALLMARK_MYC_TARGETS_V1	HALLMARK_OXIDATIVE_PHOSPHORYLATION	-0.0815011	0.0714346	0.126322	0.0794886	0.000274455	0.153769	-0.0235829	-0.227614	0.0723488	0.045797	0.0647706	0.157509	0.240805	0.232875	0.157312	0.104735	-0.00486247	0.0569137	0.129571	-0.0389107	0.159215	0.203551	0.144599	0.240121	0.139419	0.190247	-0.0700788	0.0780621	0.00162756	0.191897	0.224132	0.0688953	0.0991364	0.00932827	0.200066	0.0960423	0.013538	0.138616	0.143743	0.0165825	0.0105834	0.210224	-0.0520784	0.0750595	0.0442736	0.126507	-0.0112734	0.0472234
HALLMARK_MYC_TARGETS_V2	HALLMARK_MITOTIC_SPINDLE	0.0768283	0.117496	0.103172	0.0390187	0.184637	0.137709	0.135911	0.114352	0.111786	0.0413444	0.134037	0.136201	0.0361234	0.16548	0.112192	0.234066	0.122478	0.0939914	0.100704	0.186349	0.141326	0.0539212	0.0423925	-0.00588665	0.134647	0.126023	0.114769	0.150815	0.0771475	0.0787269	0.130589	0.101334	0.139037	0.15417	0.0930739	0.121405	0.0616825	0.0628502	0.159882	0.109225	0.0931707	0.143216	0.0203701	0.105196	0.145547	0.14856	0.203115	0.135495
HALLMARK_MYOGENESIS	HALLMARK_G2M_CHECKPOINT	0.176519	0.277235	0.194507	0.178416	0.190872	0.251102	0.249866	0.0144204	0.253496	0.0990959	0.219422	0.242639	0.0892022	0.250756	0.302135	0.2126	0.239185	-0.00220513	0.178346	0.280958	0.246272	0.15756	0.00291417	-0.00314979	0.181805	0.231234	0.178945	0.335109	0.180618	0.330891	0.253633	0.24247	0.319575	0.271036	0.111569	0.109532	0.137698	0.136518	0.371147	0.245822	0.199539	0.217604	0.253345	0.150388	0.235531	0.244273	0.309169	0.169964
HALLMARK_NOTCH_SIGNALING	HALLMARK_E2F_TARGETS	0.231456	0.326581	0.209859	0.17878	0.261803	0.338315	0.318847	-0.0856529	0.311633	0.193185	0.365531	0.347332	0.203628	0.345635	0.380075	0.361287	0.312359	-0.0729313	0.316414	0.351746	0.344052	0.154163	0.110323	0.0225179	0.224394	0.350114	0.190681	0.462122	0.240397	0.394149	0.325123	0.289998	0.378875	0.359026	0.211789	-0.021242	0.19537	0.183131	0.402846	0.373702	0.31057	0.274547	0.291858	0.184239	0.267065	0.29314	0.375015	0.271981
HALLMARK_PANCREAS_BETA_CELLS	HALLMARK_HEDGEHOG_SIGNALING	-0.0496059	-0.142941	0.0234892	-0.163618	-0.27583	-0.0305312	-0.393429	-0.0547649	-0.285553	-0.303523	-0.218217	-0.0261908	-0.410953	-0.13648	-0.00128978	-0.236048	-0.0568993	-0.0485556	-0.0971005	-0.0608864	-0.234386	-0.12537	-0.0718628	-0.225014	0.0581205	0.0174145	-0.139749	0.191305	0.102252	-0.226062	-0.244636	0.0178347	-0.282067	0.0131366	-0.000577408	-0.0967435	-0.133004	-0.015794	-0.0470211	-0.0477879	-0.0734083	-0.0635641	0.328689	-0.218755	-0.011547	-0.170279	-0.255208	0.126856
HALLMARK_PEROXISOME	HALLMARK_KRAS_SIGNALING_DN	0.0331781	0.0441248	0.0430505	0.122657	0.0347257	-0.0151595	0.00403951	0.131293	-0.00570829	0.0702232	0.042342	-0.0252317	0.0295134	-0.000749341	-0.0104507	-0.0498389	0.0681493	0.0240694	0.0406779	-0.00715458	-0.0285835	0.00502734	0.0817864	-0.0100928	-0.0215632	-0.0337634	0.0496031	-0.0105028	0.0379079	0.0600847	-0.0229329	0.0795635	0.00580097	-0.0415082	0.0175731	0.0117938	0.0751162	0.0552444	0.00509543	0.0928552	0.105908	-0.0112232	0.129339	0.0256765	0.0655292	0.0286956	0.00622096	0.0458151
HALLMARK_PI3K_AKT_MTOR_SIGNALING	HALLMARK_KRAS_SIGNALING_UP	0.150654	0.0121593	0.0677788	-0.00114161	0.0772063	-0.02079	-0.0224131	0.202554	0.0369141	0.0738677	-0.0032491	0.0210332	0.0459623	0.0905529	-0.0293164	0.0846802	0.0483178	0.0920114	0.0192282	0.156074	-0.0792774	0.0508212	0.0636612	0.0991338	0.0259031	0.156449	0.0745388	0.0575937	0.225381	0.0673779	0.0932818	0.0972711	0.029851	0.19841	-0.0147031	0.159418	0.144459	0.113733	0.104255	0.0820794	0.0176484	0.0423107	0.0263148	0.10175	-0.0424247	0.0476273	0.0890479	0.109926
HALLMARK_PROTEIN_SECRETION	HALLMARK_MTORC1_SIGNALING	0.083748	0.202028	0.076458	0.0207598	0.162805	0.22123	0.179535	-0.0921462	0.0735175	0.169774	0.160738	0.0500103	0.184539	0.147524	0.213189	0.249411	0.230254	-0.00294977	0.28939	0.212407	0.208493	0.0959243	0.16279	0.185132	0.0129129	0.28306	0.0924401	0.189088	0.265361	0.219394	0.239076	0.221852	0.232071	0.221372	0.0558204	0.11932	0.0783104	0.138712	0.199799	0.19375	0.141817	0.211265	0.097133	0.15084	0.133209	0.237872	0.218702	0.257007
HALLMARK_REACTIVE_OXIGEN_SPECIES_PATHWAY	HALLMARK_NOTCH_SIGNALING	0.134122	0.10774	0.140956	0.0980142	0.160347	0.206424	0.128712	0.212519	0.168665	0.0807909	0.0647951	0.192437	0.118742	0.0748388	0.106823	0.197077	0.23677	0.155001	0.118456	0.109469	0.196221	0.0491764	0.177435	0.0727014	0.191848	0.0389002	0.127218	-0.0317805	0.0943812	0.0414643	0.170068	0.185374	0.10267	0.0520976	-0.00144101	0.180754	0.251923	0.185893	0.12091	-0.0271236	0.140719	0.114164	0.0936492	0.208091	-0.0951859	0.161473	-0.00223842	0.167949
HALLMARK_SPERMATOGENESIS	HALLMARK_PI3K_AKT_MTOR_SIGNALING	0.0291712	0.120704	0.135536	0.0790969	0.12732	0.146022	0.0852168	0.0693198	0.117528	0.096832	0.00112053	0.120108	0.0977825	0.199768	0.132573	0.190823	0.0850058	0.151929	0.0824389	-0.00404185	0.050904	0.120586	0.0817417	0.0929283	0.12684	0.131695	0.0869746	0.110822	0.0324129	0.128154	0.18736	0.10379	0.125324	0.108149	0.133878	0.11292	0.0221332	0.128845	0.104867	0.031134	0.1053	0.0873478	0.0865286	0.0892995	0.145594	0.169283	0.163733	0.0925942
HALLMARK_TGF_BETA_SIGNALING	HALLMARK_WNT_BETA_CATENIN_SIGNALING	0.0781454	0.0763727	0.0739419	0.130182	0.107624	0.0169276	0.110191	0.182003	0.146635	0.00159945	0.0605357	0.15993	0.101856	0.0488795	0.0233139	0.117392	-0.0734142	0.0127376	-0.0542975	0.266987	0.100729	0.0347205	0.000994972	0.00618584	-0.0663796	-0.00668218	0.0883481	0.261109	0.264675	-0.0174843	-0.0713573	0.0645762	0.00658977	-0.0153785	0.0650836	0.139811	-0.0494834	0.162107	0.0551318	0.143241	0.135277	-0.157623	0.185264	0.136374	0.115128	0.0496143	0.130464	0.122548
HALLMARK_TNFA_SIGNALING_VIA_NFKB	HALLMARK_REACTIVE_OXIGEN_SPECIES_PATHWAY	0.15012	0.0360828	0.00842275	0.125955	0.137262	0.145254	0.13108	0.142598	0.125811	0.0929806	0.0267601	0.0189946	0.27675	0.142583	0.0241856	0.16992	0.0743854	0.138726	0.206353	0.131933	0.154097	0.108807	0.210568	0.14801	0.0270162	0.295293	0.0727779	-0.00842619	0.186903	0.0450289	0.2281	0.177068	0.00271197	0.229643	0.166608	0.0752882	0.121059	0.0881752	0.121518	-0.0615054	0.0243315	0.172457	-0.0265569	0.114563	0.214271	0.190018	-0.037441	0.185144
HALLMARK_UNFOLDED_PROTEIN_RESPONSE	HALLMARK_UV_RESPONSE_DN	0.0286363	-0.082816	0.079827	-0.0550853	-0.0267206	0.0470917	0.0266101	0.0973845	-0.0224682	-0.15646	0.0226291	7.62657e-05	-0.115733	0.0328734	0.0338106	-0.0476253	-0.0868432	-0.0430606	1.50652e-05	0.0307588	-0.0475495	-0.0218165	-0.0270375	0.0802751	0.0761316	0.0115793	-0.00189704	0.0437066	0.109149	-0.00369658	-0.0369964	0.00457096	0.0591079	0.112553	-0.0778611	0.0936208	0.102827	-0.0737387	0.0440289	-0.0104117	-0.026287	-0.0339506	0.0584661	-0.0360298	-0.0388457	-0.0842694	0.0444735	0.0690584
HALLMARK_UV_RESPONSE_UP	HALLMARK_UV_RESPONSE_UP	0.0491681	0.120708	0.0941753	0.115995	0.0825467	0.164831	0.029708	0.0574672	0.074014	0.152516	0.0678283	0.0976753	0.095761	0.0623111	0.0746095	0.14469	0.147811	0.0435276	0.0910655	0.16578	0.0772176	0.0781199	0.144992	0.0137451	0.0486316	0.136685	0.126221	0.148056	0.112777	0.0274759	0.173295	0.0970953	0.162669	0.113973	0.112855	0.119077	0.0760744	0.0553237	0.0775819	0.0239609	0.0831637	0.0791239	0.136398	0.0746762	0.139353	0.194314	0.121816	0.137407
HALLMARK_WNT_BETA_CATENIN_SIGNALING	HALLMARK_DNA_REPAIR	0.0746356	0.137614	0.137797	0.0688337	0.137522	0.190458	0.146284	-0.0605106	0.119905	0.0447115	0.0960399	0.201891	0.177094	0.144417	0.170692	0.201591	0.103988	0.141265	0.174145	0.0704008	0.21816	0.188579	0.149017	0.163157	0.0767327	0.167835	0.0843147	0.138334	0.0879467	0.126411	0.148686	0.103999	0.144799	0.0808791	0.165677	0.106421	0.050845	0.165396	0.112787	0.152821	0.110782	0.151303	0.159473	0.130535	0.17514	0.143805	0.152948	0.0731111
HALLMARK_XENOBIOTIC_METABOLISM	HALLMARK_COAGULATION	-0.115467	-0.0059976	0.0226632	-0.0228036	2.74221e-05	-0.0725108	-0.138416	-0.0597707	-0.0947463	-0.0560011	-0.0807452	-0.120368	0.0731067	-0.111012	-0.146906	-0.0742832	0.0560651	0.213082	-0.0770468	-0.0728452	-0.102871	-0.0549525	0.0766115	-0.014268	-0.0588427	-0.00960473	-0.0227884	-0.17956	0.222817	-0.135329	0.038044	0.0193124	-0.0383611	-0.0916947	-0.145222	-0.143175	-0.0282773	-0.172916	0.0140725	-0.068867	-0.161802	0.0252876	-0.0498396	-0.0409819	-0.0462914	-0.152969	-0.0764061	-0.0140039
	HALLMARK_ADIPOGENESIS	-0.0124859	0.0618911	0.0954199	0.023295	0.0617166	0.112099	0.0392872	0.0322436	0.0710903	0.0122656	0.0174588	0.074658	0.061261	0.153264	0.137521	0.0983046	0.0617379	0.039597	0.114877	-0.0107191	0.0330686	0.0730827	0.112207	0.163865	0.14161	0.0803817	0.099309	0.0379075	0.0491633	0.140688	0.158961	0.0402774	0.142554	0.0784135	0.039201	0.101465	0.13351	0.0447301	0.107726	0.0361366	0.020345	0.0749527	-0.144829	0.0828648	0.092381	0.186068	0.014182	0.0776103
	HALLMARK_ALLOGRAFT_REJECTION	0.327208	-0.10397	-0.128857	-0.0882243	-0.0930164	-0.114924	-0.119407	0.394034	0.151493	0.310625	-0.139331	-0.0970324	0.349738	-0.129013	-0.163611	0.250325	-0.0148355	-0.0172739	-0.0658539	0.300623	0.131158	-0.100344	0.0307356	0.0959279	-0.165299	0.325151	-0.0422035	-0.12529	0.19639	0.0212983	0.263696	0.350248	-0.105551	0.428525	-0.0756414	0.239936	0.000339719	0.193145	0.0338561	0.0345583	0.163152	0.0620495	-0.060125	0.131328	0.0280523	-0.125178	0.175539	0.0860489
	HALLMARK_UNFOLDED_PROTEIN_RESPONSE	0.140226	0.200849	0.132253	0.085758	0.150885	0.210397	0.173094	0.0500597	0.10075	0.072757	0.135804	0.180512	0.129073	0.162425	0.229623	0.193119	0.150808	0.087644	0.206748	0.131187	0.276062	0.131129	0.132856	0.122293	0.0544971	0.19736	0.187387	0.216417	0.149803	0.197802	0.188678	0.129337	0.218658	0.163038	0.159117	0.215287	0.0407286	0.159212	0.185255	0.105893	0.126069	0.196071	0.0608106	0.117918	0.185667	0.20199	0.194527	0.157401
	HALLMARK_PROTEIN_SECRETION	0.0440969	-0.00741339	0.112869	0.0121717	0.0184715	0.101927	0.0495018	-0.0854035	0.103385	-0.0314046	0.0411806	0.128978	-0.0517151	0.205552	0.0867978	0.0958541	0.035008	0.100993	-0.0186785	-0.00154335	0.0201687	0.0887494	0.0984637	0.192217	0.108958	0.0609911	0.0931486	0.0481977	0.00297153	0.136094	0.11616	0.0852307	0.140724	0.0574172	0.0277581	0.142573	0.0746651	0.0614492	0.0440473	-0.0353978	-0.0409444	0.201152	-0.171863	0.00303079	0.0418601	0.192038	0.0798615	-0.0245217
	HALLMARK_PANCREAS_BETA_CELLS	0.0273332	-0.174064	-0.135363	-0.205438	-0.191734	-0.182937	-0.207082	-0.148945	-0.267658	-0.281712	-0.288252	-0.194714	-0.311219	-0.234969	-0.184535	-0.239064	-0.238071	-0.202815	-0.246781	-0.223248	-0.221203	-0.248778	0.363905	-0.295611	-0.0926274	-0.186054	-0.213066	-0.0327915	-0.0267641	-0.178534	-0.303604	-0.0563327	-0.270741	-0.142202	-0.205725	-0.257787	-0.143879	-0.27098	-0.3076	-0.128223	-0.227226	-0.200529	0.349346	-0.245563	-0.0678528	-0.260876	-0.208448	-0.190799
	HALLMARK_MYOGENESIS	-0.0638912	-0.00907691	0.0637911	-0.000216787	0.0315932	0.0915313	-0.0186145	0.17357	-0.0330087	0.00754196	-0.0145963	-0.0215894	0.0506217	-0.0418628	-0.0709058	-0.0306414	0.0725185	0.0628736	-0.0267163	0.111858	0.0319785	-0.0940974	0.140787	0.110204	0.067907	-0.0346244	0.0816457	-0.0720442	0.150068	-0.107613	-0.157793	-0.0161514	-0.0580092	-0.100142	-0.0568211	0.0792668	0.0925209	0.0511913	-0.0447986	0.00739526	0.0484591	-0.0642718	0.0450787	0.121436	0.110986	0.0181528	-0.0735881	0.0707149
[truncated: 355 more columns]

## Sheet: Sheet2
HALLMARK	TCGA.2F.A9KO.01	TCGA.2F.A9KP.01	TCGA.2F.A9KQ.01	TCGA.2F.A9KR.01	TCGA.2F.A9KT.01	TCGA.2F.A9KW.01	TCGA.4Z.AA7M.01	TCGA.4Z.AA7N.01	TCGA.4Z.AA7O.01	TCGA.4Z.AA7Q.01	TCGA.4Z.AA7R.01	TCGA.4Z.AA7S.01	TCGA.4Z.AA7W.01	TCGA.4Z.AA7Y.01	TCGA.4Z.AA80.01	TCGA.4Z.AA81.01	TCGA.4Z.AA82.01	TCGA.4Z.AA83.01	TCGA.4Z.AA84.01	TCGA.4Z.AA86.01	TCGA.4Z.AA87.01	TCGA.4Z.AA89.01	TCGA.5N.A9KI.01	TCGA.5N.A9KM.01	TCGA.BL.A0C8.01	TCGA.BL.A13I.01	TCGA.BL.A13J.01	TCGA.BL.A3JM.01	TCGA.BL.A5ZZ.01	TCGA.BT.A0S7.01	TCGA.BT.A0YX.01	TCGA.BT.A20J.01	TCGA.BT.A20N.01	TCGA.BT.A20O.01	TCGA.BT.A20P.01	TCGA.BT.A20Q.01	TCGA.BT.A20R.01	TCGA.BT.A20T.01	TCGA.BT.A20U.01	TCGA.BT.A20V.01	TCGA.BT.A20W.01	TCGA.BT.A20X.01	TCGA.BT.A2LA.01	TCGA.BT.A2LB.01	TCGA.BT.A2LD.01	TCGA.BT.A3PH.01	TCGA.BT.A3PJ.01	TCGA.BT.A3PK.01	TCGA.BT.A42C.01
HALLMARK_BILE_ACID_METABOLISM	0.040907	-0.0994821	0.0793949	-0.060472	-0.12113	0.00103729	-0.0150344	-0.0556466	-0.0275909	0.0378179	-0.0271557	0.00734532	-0.00193483	-0.124149	0.0213586	-0.125897	-0.0642488	0.0556295	0.0161408	-0.0727701	-0.020455	-0.013532	0.027323	0.0953345	0.0892303	-0.115857	0.119932	0.0644109	-0.0112611	-0.0833944	-0.0544963	-0.0476445	-0.15956	-0.143125	-0.0329042	-0.036281	0.039739	0.0274578	-0.0821311	-0.0540986	0.00417882	-0.154313	-0.186832	-0.114405	-0.0150417	-0.0791039	-0.0488481	-0.0739088	0.0305416
HALLMARK_FATTY_ACID_METABOLISM	0.0284159	0.0343967	0.11587	0.0295535	-0.0889459	0.141867	0.00962361	-0.0462242	0.0464289	-0.037039	0.108798	0.111589	-0.00116216	0.0518788	0.0588843	-0.0801563	-0.00894283	0.0471248	0.0322257	-0.0502833	0.153318	0.0800447	0.150499	0.167946	0.184306	0.0881409	0.0526378	0.0519183	0.0547928	0.166769	0.116839	-0.0287586	0.0473565	0.0473165	0.0647078	0.000833647	0.0841008	0.0362515	0.0548778	-0.0582317	0.0791028	-0.00281879	-0.0675413	0.117006	-0.0261861	0.0135031	-0.0743693	-0.0173507	0.0812687
HALLMARK_GLYCOLYSIS	0.00171226	0.144658	0.168877	0.103512	0.152123	0.164103	0.130751	-0.00651675	0.114464	0.122041	0.135407	0.19225	0.120959	0.225637	0.166106	0.151574	0.138433	0.154512	0.153673	0.10711	0.130721	0.130955	0.221893	0.186167	0.182709	0.102836	0.161031	0.0769317	0.116729	0.0498603	0.197455	0.169817	0.170563	0.0814142	0.136104	0.158389	0.204319	0.127954	0.197591	0.149445	-0.012109	0.137424	-0.00753183	0.1586	0.137891	0.211516	0.1435	0.150324	0.143718
HALLMARK_HEME_METABOLISM	-0.051555	-0.0334884	0.0464119	-0.0498452	0.0323554	0.0434639	-0.0776127	0.0503295	-0.0109552	0.033906	-0.0117317	0.0401642	0.000362325	0.0119827	0.00019845	0.024081	0.0108486	0.0101525	-0.00227452	0.0314959	-0.0112097	-0.0595114	0.0584761	0.0498666	0.164523	0.0316148	0.0566494	0.0592902	0.0534691	0.0364258	0.0763356	-0.00496334	0.053436	0.0494159	0.00379894	-0.0051275	0.0314325	-0.0258797	0.0456746	0.0400393	0.0148105	0.0630658	0.0421235	0.0188984	0.0643853	0.0713896	0.0263223	0.00518579	0.0168385
HALLMARK_PEROXISOME	0.117381	0.150609	0.098146	0.163852	0.0998484	0.082329	0.0987482	0.122741	0.0501542	0.127495	0.158407	0.191259	0.120827	0.155683	0.197734	0.166457	0.116918	0.199483	0.140591	0.0661985	0.200627	0.146503	0.143288	0.261919	0.127529	0.0566208	0.0886727	0.0672466	0.135011	0.150468	0.0919197	0.0659695	0.215571	0.00756761	0.159718	0.132647	0.110932	0.151456	0.0600835	0.0597199	0.0620764	0.175121	0.173761	0.0560353	0.147821	0.249564	0.0906543	0.11433	0.19779
HALLMARK_XENOBIOTIC_METABOLISM	0.100654	0.0951842	0.127615	0.0795232	-0.0132915	0.0741022	0.0890967	0.00672747	0.0350903	0.0603735	0.12615	0.128312	0.00334215	0.142375	0.139105	-0.0396955	-0.0808203	0.11103	-0.0524056	-0.091966	0.101382	0.10236	0.155145	0.113444	0.122744	0.0410016	0.0164377	0.000419881	0.111479	-0.0349616	0.119079	-0.0977826	0.0480741	0.0280904	0.139721	0.108483	0.0576652	0.106024	0.0648342	0.00128116	0.134702	-0.0634118	-0.101799	0.104144	0.040817	0.105257	-0.0270873	-0.00415387	0.177519
HALLMARK_ANDROGEN_RESPONSE	0.0808094	0.0905728	0.119864	-0.0296057	0.0467249	0.095108	0.00296413	0.139187	0.0601231	0.0327307	0.0812392	0.0728667	-0.00300543	0.173347	0.152646	0.0385213	0.0475422	0.076637	0.0279185	0.0728513	0.048144	0.0262837	0.125682	0.167626	0.0998112	0.124261	0.0806383	-0.0280394	0.0574759	0.0599564	0.131588	0.126292	0.123239	0.135488	0.0460084	0.159194	0.114593	0.0648152	0.128918	0.0141299	0.108974	0.070715	-0.0338357	0.0796273	0.0560079	0.141286	0.0310492	0.0323692	0.144937
HALLMARK_ESTROGEN_RESPONSE_EARLY	0.0210102	0.128942	0.0934212	0.0786546	0.0934166	0.0921111	0.10231	0.189772	0.100995	0.102794	0.0380021	0.137288	0.0729058	0.169768	0.10482	0.135258	0.111766	0.141284	0.0717352	0.0519454	0.071176	0.0986921	0.0963086	0.154812	0.140967	-0.0346173	0.096343	0.0824963	0.0274954	0.0129916	0.0738569	0.00409835	0.162131	-0.0675617	0.00562396	0.17072	0.115164	0.0996323	0.140377	0.0861926	0.198198	0.00752501	0.0276545	0.128458	0.0731104	0.0819572	0.0679934	0.0476271	0.130649
HALLMARK_SPERMATOGENESIS	-0.0255694	0.0516122	0.00872695	0.025119	0.0393883	0.0714208	0.0430878	-0.0400809	0.0068417	0.100648	0.0749483	0.0423407	0.0531635	-0.00899569	0.0655651	0.00815818	0.0123195	-0.0436533	0.100566	-0.0282689	0.0796622	-0.0656704	0.0201862	0.00791327	0.0358978	0.091918	0.0844894	0.0786727	0.0355964	0.0604696	-0.00206135	0.140178	0.0497649	0.0282482	0.0354014	-0.0454968	0.0388722	-0.0322796	-0.0201093	0.0345351	0.0323353	0.0406537	0.151828	-0.042405	0.0618504	0.0562914	0.0900414	0.059592	0.0502408
HALLMARK_HYPOXIA	0.0630103	0.00713675	0.179896	-0.0265738	0.157165	0.137268	-0.0563495	0.150902	0.0900905	0.0235019	0.0269559	0.146633	0.0308027	0.202993	0.0224742	0.047576	0.182097	0.216457	0.0796053	0.210019	0.00404966	0.0187154	0.110125	0.00987402	0.124563	0.0853481	0.244991	0.047791	0.187632	0.0592871	0.00441333	0.172294	0.0221051	0.105744	0.069236	0.0547084	0.140976	0.062121	0.0448728	0.0727247	0.0197624	0.0766404	-0.00958404	0.185415	0.0391319	0.176869	0.0794775	0.206293	0.101023
HALLMARK_ANGIOGENESIS	-0.097713	0.106161	-0.0933368	-0.173261	-0.254195	0.28111	-0.279824	0.163211	-0.179907	-0.121681	-0.173405	-0.161191	-0.233762	-0.197683	-0.287153	-0.11559	-0.340794	-0.0288881	-0.0268789	-0.0798191	-0.212951	-0.312083	0.125681	-0.290747	0.10317	0.218982	-0.244207	0.0238424	0.487795	-0.0855492	-0.246845	-0.160763	-0.265384	0.0285471	0.0240486	-0.205386	0.0665009	-0.164134	-0.200294	-0.200314	-0.191178	-0.0793958	-0.112758	0.0311824	0.0556821	-0.170654	-0.254924	0.212275	-0.298749
HALLMARK_APICAL_JUNCTION	0.0311297	-0.0110659	0.0870687	0.0746066	0.117126	0.106525	0.0415123	0.233469	0.119071	0.175229	0.0505261	0.0320103	0.136507	0.0620852	-0.00541689	0.123808	0.163215	0.0928652	0.00730933	0.139836	-0.0305128	0.017097	0.148463	0.0103795	0.105707	0.137641	0.116102	-0.0227577	0.303306	0.0741267	0.135478	0.133305	0.0960041	0.10866	0.060912	0.133381	0.154991	0.132283	0.162356	0.082591	0.0672456	0.137171	0.0800007	0.199047	0.193569	0.0750183	0.149957	0.216666	0.0297326
HALLMARK_APICAL_SURFACE	0.157447	0.106308	0.0554114	0.0859369	0.119291	-0.048805	0.0359772	0.204486	0.0918529	0.12274	0.0762741	0.09647	0.09046	-0.0222294	0.112833	0.191107	0.16701	0.190232	-0.00123261	0.127863	-0.00594522	0.0832667	0.1989	0.0573907	0.151454	-0.0906906	0.085883	0.0687949	0.11567	0.0232432	-0.0190661	-0.0870091	-0.0698124	0.0108558	0.0502084	0.0412277	0.0607462	0.114266	0.0889774	0.223561	0.187607	0.0305888	0.0467069	0.114886	0.0654572	0.0261166	0.0244135	0.145973	0.189524
HALLMARK_APOPTOSIS	0.0716579	0.0813589	0.095061	0.121249	0.162577	0.0935636	0.0805183	0.133438	0.0820546	0.0966774	0.0665753	0.0664952	0.085337	0.130725	0.0211701	0.111265	0.181255	0.096914	0.0842737	0.219103	0.0559018	0.116403	0.0854861	0.0752531	0.0187088	0.193184	0.129871	-0.0922252	0.162336	0.0974313	0.0644168	0.0878288	0.0649374	0.23202	0.0922741	0.168792	0.12341	0.207071	0.0410727	0.147656	0.0635204	0.211949	0.112463	0.12596	0.0680244	0.133904	0.228994	0.203652	0.0786523
HALLMARK_TNFA_SIGNALING_VIA_NFKB	0.27206	0.18148	0.0587119	0.110759	0.17723	0.242439	-0.0147633	0.418751	0.142279	0.190256	0.0580424	0.111554	0.288296	0.197947	0.188449	0.139415	0.261598	0.298183	0.143153	0.258964	0.051828	0.172315	0.195163	0.146316	-0.047874	0.177715	0.117576	-0.11122	0.355422	0.130963	0.238559	0.154709	0.079672	0.252757	0.139069	0.172528	0.198438	0.269232	0.158215	0.0690969	0.16302	0.272332	-0.0653444	0.267776	0.169467	0.182855	0.210315	0.342746	0.179805
HALLMARK_IL2_STAT5_SIGNALING	0.127756	0.018743	0.00479982	-0.0789205	-0.0141802	0.0789343	-0.0181685	0.242895	0.10943	0.109949	0.0516476	-0.0275767	0.175089	0.0673598	0.0129102	0.100462	0.0748078	0.0923436	-0.0369784	0.26073	0.0533358	-0.0437197	0.0765664	0.0584834	0.0620498	0.223631	0.0447596	0.0588299	0.283262	0.0163109	0.125744	0.158223	0.0495117	0.290125	0.0497993	0.137123	0.112344	0.0727301	0.0995269	0.0928908	0.154229	0.130234	-0.101352	0.15905	0.0489179	-0.0059592	0.176408	0.203568	-0.0467036
HALLMARK_IL6_JAK_STAT3_SIGNALING	0.119531	-0.0812703	0.0492402	0.0428772	-0.0517071	0.132091	-0.0561886	0.246143	0.0539032	0.106726	0.0136974	0.0360499	0.112859	0.05978	-0.0128895	-0.0459747	0.235914	0.14549	0.0191971	0.157128	-0.0513217	0.0936504	0.203616	0.0869649	0.145202	0.419947	-0.0044886	0.03082	0.219036	0.0425898	-0.0184462	0.167275	0.00519479	0.365927	0.0832515	0.143872	0.00282048	0.119915	-0.0270344	0.229352	0.250835	0.0940681	-0.222653	0.0901188	0.176056	0.109228	0.128319	0.108949	0.00732514
HALLMARK_INFLAMMATORY_RESPONSE	0.145472	-0.184401	-0.1295	-0.0585726	-0.0369471	0.105351	-0.185314	0.302389	-0.116821	0.167695	-0.16595	-0.077695	0.149337	-0.133073	-0.0470717	-0.0345373	0.0475333	0.00806246	-0.185606	0.286939	-0.0932295	-0.255713	0.0848513	0.00326025	0.0461744	0.289018	-0.171805	-0.263344	0.313878	-0.0936355	0.199313	0.20084	-0.241675	0.342498	-0.179944	0.0307629	0.138615	-0.0939865	0.0603425	0.0228052	0.0305854	0.0879544	-0.11736	0.137402	-0.14143	-0.100626	0.157054	0.342735	-0.0611592
HALLMARK_INTERFERON_ALPHA_RESPONSE	0.244672	-0.0623034	-0.000629686	0.167214	-0.114232	0.0985196	-0.0536387	0.081216	0.158906	0.240932	0.00346802	0.00662528	0.306379	0.169777	0.198508	0.318694	0.117736	0.315802	-0.0354074	0.213088	-0.199224	0.250564	0.323084	0.190866	0.150922	0.242596	-0.112358	-0.0405035	-0.0171291	-0.144027	0.280029	0.0506526	-0.0997698	0.389547	0.117803	0.235788	0.127728	0.245227	0.108469	0.0211424	-0.0339657	0.180019	-0.1898	0.192382	0.0852389	-0.103222	0.161848	0.107338	0.016692
HALLMARK_INTERFERON_GAMMA_RESPONSE	0.416592	-0.0731872	-0.107575	0.0941821	-0.121747	-0.0559842	-0.0708801	0.348358	0.224547	0.407921	-0.116319	-0.087954	0.381897	-0.0317529	0.067542	0.391315	0.188946	0.162195	-0.139494	0.381083	0.0494538	0.130006	0.253325	0.171754	0.0733516	0.273851	-0.0071277	0.0328863	0.0114452	-0.194133	0.148326	0.228158	-0.120502	0.492999	-0.0293237	0.316112	0.212012	0.256164	0.100231	0.0665137	0.14951	0.0738831	-0.219916	0.265994	0.079444	-0.0733754	0.23047	0.201711	0.0358084
HALLMARK_COMPLEMENT	0.117383	-0.068963	-0.0334878	-0.0320509	-0.0359572	0.064968	-0.0567101	0.217162	0.026261	0.194075	-0.0887498	-0.0722245	0.10494	-0.0127602	-0.0198926	0.0321292	0.0689949	-0.0294284	-0.0515984	0.187102	-0.0183052	-0.106981	0.0684205	-0.00561184	0.0619764	0.185885	0.0116966	0.0306201	0.192019	-0.0156178	0.134497	0.197077	0.00109027	0.278305	-0.0765494	0.117507	0.0961706	0.0110732	0.0505933	0.0603038	-0.0484413	0.0597831	-0.000638538	0.0746901	-0.0521467	-0.0394095	0.107756	0.154137	0.0472481
HALLMARK_EPITHELIAL_MESENCHYMAL_TRANSITION	0.0969653	-0.152846	-0.112304	-0.122884	0.0763762	0.0858939	0.0193396	0.313775	0.0932594	-0.113995	0.0124091	-0.194893	-0.00359062	-0.144113	-0.294117	-0.124967	0.249953	0.00710155	0.0350992	0.324417	-0.109267	-0.231573	0.19705	0.0501959	-0.100507	0.228316	0.246724	0.121253	0.450754	0.131531	-0.0531202	-0.00367115	0.125097	0.345031	-0.122074	0.292245	0.428329	0.265931	0.184173	-0.122943	-0.010456	0.203062	0.0103917	0.267094	0.126696	-0.109335	0.185954	0.319961	-0.198125
HALLMARK_TGF_BETA_SIGNALING	0.073262	0.0328661	0.147221	0.0614383	0.117664	0.0126844	-0.0460839	0.0846107	0.216585	-0.132419	-0.0513895	0.0849718	-0.0848532	0.110259	-0.0169008	0.138736	0.10316	0.0597926	0.0902113	0.163837	0.0167329	0.110113	-0.076589	0.0202418	0.10143	0.0880293	0.0750852	0.0760544	0.221397	0.0631754	0.0417609	0.0948287	0.0964388	0.0244378	-0.0173227	0.115453	0.0846651	0.0892563	0.19011	0.0284864	0.0835901	0.126574	-0.000548495	0.035696	0.152557	0.135511	0.120292	0.139787	-0.00988151
HALLMARK_MYC_TARGETS_V1	0.106096	0.272331	0.154429	0.0515449	0.160144	0.223145	0.12622	-0.0638983	0.232813	0.182275	0.155669	0.221215	0.296839	0.1799	0.219056	0.330295	0.193199	0.103544	0.267083	0.12724	0.343432	0.23314	0.133077	0.159479	0.0174802	0.315724	0.157999	0.251511	0.219	0.365223	0.239074	0.275379	0.291761	0.201797	0.159233	0.0815315	0.106927	0.196764	0.3222	0.214644	0.219908	0.287575	0.185208	0.184352	0.19952	0.223992	0.241837	0.173927	0.184567
HALLMARK_MYC_TARGETS_V2	0.12731	0.392241	0.108285	0.111087	0.256463	0.296635	0.121218	-0.120757	0.132978	0.120678	0.186663	0.116658	0.251891	0.0926092	0.272813	0.311341	0.318719	0.201501	0.36066	0.172558	0.286941	0.195813	0.0749389	0.0400197	-0.0973526	0.358621	-0.00689135	0.272244	0.23044	0.293332	0.266728	0.288276	0.338833	0.28043	0.149744	-0.0043103	0.00895502	0.22012	0.37753	0.215019	0.247487	0.394383	0.195919	0.270456	0.154458	0.15709	0.270725	0.23922	0.253593
HALLMARK_MITOTIC_SPINDLE	0.0768283	0.117496	0.103172	0.0390187	0.184637	0.137709	0.135911	0.114352	0.111786	0.0413444	0.134037	0.136201	0.0361234	0.16548	0.112192	0.234066	0.122478	0.0939914	0.100704	0.186349	0.141326	0.0539212	0.0423925	-0.00588665	0.134647	0.126023	0.114769	0.150815	0.0771475	0.0787269	0.130589	0.101334	0.139037	0.15417	0.0930739	0.121405	0.0616825	0.0628502	0.159882	0.109225	0.0931707	0.143216	0.0203701	0.105196	0.145547	0.14856	0.203115	0.135495	0.0844741
HALLMARK_G2M_CHECKPOINT	0.176519	0.277235	0.194507	0.178416	0.190872	0.251102	0.249866	0.0144204	0.253496	0.0990959	0.219422	0.242639	0.0892022	0.250756	0.302135	0.2126	0.239185	-0.00220513	0.178346	0.280958	0.246272	0.15756	0.00291417	-0.00314979	0.181805	0.231234	0.178945	0.335109	0.180618	0.330891	0.253633	0.24247	0.319575	0.271036	0.111569	0.109532	0.137698	0.136518	0.371147	0.245822	0.199539	0.217604	0.253345	0.150388	0.235531	0.244273	0.309169	0.169964	0.170818
HALLMARK_E2F_TARGETS	0.231456	0.326581	0.209859	0.17878	0.261803	0.338315	0.318847	-0.0856529	0.311633	0.193185	0.365531	0.347332	0.203628	0.345635	0.380075	0.361287	0.312359	-0.0729313	0.316414	0.351746	0.344052	0.154163	0.110323	0.0225179	0.224394	0.350114	0.190681	0.462122	0.240397	0.394149	0.325123	0.289998	0.378875	0.359026	0.211789	-0.021242	0.19537	0.183131	0.402846	0.373702	0.31057	0.274547	0.291858	0.184239	0.267065	0.29314	0.375015	0.271981	0.259923
HALLMARK_HEDGEHOG_SIGNALING	-0.0496059	-0.142941	0.0234892	-0.163618	-0.27583	-0.0305312	-0.393429	-0.0547649	-0.285553	-0.303523	-0.218217	-0.0261908	-0.410953	-0.13648	-0.00128978	-0.236048	-0.0568993	-0.0485556	-0.0971005	-0.0608864	-0.234386	-0.12537	-0.0718628	-0.225014	0.0581205	0.0174145	-0.139749	0.191305	0.102252	-0.226062	-0.244636	0.0178347	-0.282067	0.0131366	-0.000577408	-0.0967435	-0.133004	-0.015794	-0.0470211	-0.0477879	-0.0734083	-0.0635641	0.328689	-0.218755	-0.011547	-0.170279	-0.255208	0.126856	-0.164383
HALLMARK_KRAS_SIGNALING_DN	0.0331781	0.0441248	0.0430505	0.122657	0.0347257	-0.0151595	0.00403951	0.131293	-0.00570829	0.0702232	0.042342	-0.0252317	0.0295134	-0.000749341	-0.0104507	-0.0498389	0.0681493	0.0240694	0.0406779	-0.00715458	-0.0285835	0.00502734	0.0817864	-0.0100928	-0.0215632	-0.0337634	0.0496031	-0.0105028	0.0379079	0.0600847	-0.0229329	0.0795635	0.00580097	-0.0415082	0.0175731	0.0117938	0.0751162	0.0552444	0.00509543	0.0928552	0.105908	-0.0112232	0.129339	0.0256765	0.0655292	0.0286956	0.00622096	0.0458151	0.0719466
HALLMARK_KRAS_SIGNALING_UP	0.150654	0.0121593	0.0677788	-0.00114161	0.0772063	-0.02079	-0.0224131	0.202554	0.0369141	0.0738677	-0.0032491	0.0210332	0.0459623	0.0905529	-0.0293164	0.0846802	0.0483178	0.0920114	0.0192282	0.156074	-0.0792774	0.0508212	0.0636612	0.0991338	0.0259031	0.156449	0.0745388	0.0575937	0.225381	0.0673779	0.0932818	0.0972711	0.029851	0.19841	-0.0147031	0.159418	0.144459	0.113733	0.104255	0.0820794	0.0176484	0.0423107	0.0263148	0.10175	-0.0424247	0.0476273	0.0890479	0.109926	0.00786496
HALLMARK_MTORC1_SIGNALING	0.083748	0.202028	0.076458	0.0207598	0.162805	0.22123	0.179535	-0.0921462	0.0735175	0.169774	0.160738	0.0500103	0.184539	0.147524	0.213189	0.249411	0.230254	-0.00294977	0.28939	0.212407	0.208493	0.0959243	0.16279	0.185132	0.0129129	0.28306	0.0924401	0.189088	0.265361	0.219394	0.239076	0.221852	0.232071	0.221372	0.0558204	0.11932	0.0783104	0.138712	0.199799	0.19375	0.141817	0.211265	0.097133	0.15084	0.133209	0.237872	0.218702	0.257007	0.200332
HALLMARK_NOTCH_SIGNALING	0.134122	0.10774	0.140956	0.0980142	0.160347	0.206424	0.128712	0.212519	0.168665	0.0807909	0.0647951	0.192437	0.118742	0.0748388	0.106823	0.197077	0.23677	0.155001	0.118456	0.109469	0.196221	0.0491764	0.177435	0.0727014	0.191848	0.0389002	0.127218	-0.0317805	0.0943812	0.0414643	0.170068	0.185374	0.10267	0.0520976	-0.00144101	0.180754	0.251923	0.185893	0.12091	-0.0271236	0.140719	0.114164	0.0936492	0.208091	-0.0951859	0.161473	-0.00223842	0.167949	0.0585122
HALLMARK_PI3K_AKT_MTOR_SIGNALING	0.0291712	0.120704	0.135536	0.0790969	0.12732	0.146022	0.0852168	0.0693198	0.117528	0.096832	0.00112053	0.120108	0.0977825	0.199768	0.132573	0.190823	0.0850058	0.151929	0.0824389	-0.00404185	0.050904	0.120586	0.0817417	0.0929283	0.12684	0.131695	0.0869746	0.110822	0.0324129	0.128154	0.18736	0.10379	0.125324	0.108149	0.133878	0.11292	0.0221332	0.128845	0.104867	0.031134	0.1053	0.0873478	0.0865286	0.0892995	0.145594	0.169283	0.163733	0.0925942	0.145231
HALLMARK_WNT_BETA_CATENIN_SIGNALING	0.0781454	0.0763727	0.0739419	0.130182	0.107624	0.0169276	0.110191	0.182003	0.146635	0.00159945	0.0605357	0.15993	0.101856	0.0488795	0.0233139	0.117392	-0.0734142	0.0127376	-0.0542975	0.266987	0.100729	0.0347205	0.000994972	0.00618584	-0.0663796	-0.00668218	0.0883481	0.261109	0.264675	-0.0174843	-0.0713573	0.0645762	0.00658977	-0.0153785	0.0650836	0.139811	-0.0494834	0.162107	0.0551318	0.143241	0.135277	-0.157623	0.185264	0.136374	0.115128	0.0496143	0.130464	0.122548	0.0994162
HALLMARK_REACTIVE_OXIGEN_SPECIES_PATHWAY	0.15012	0.0360828	0.00842275	0.125955	0.137262	0.145254	0.13108	0.142598	0.125811	0.0929806	0.0267601	0.0189946	0.27675	0.142583	0.0241856	0.16992	0.0743854	0.138726	0.206353	0.131933	0.154097	0.108807	0.210568	0.14801	0.0270162	0.295293	0.0727779	-0.00842619	0.186903	0.0450289	0.2281	0.177068	0.00271197	0.229643	0.166608	0.0752882	0.121059	0.0881752	0.121518	-0.0615054	0.0243315	0.172457	-0.0265569	0.114563	0.214271	0.190018	-0.037441	0.185144	0.0349575
HALLMARK_UV_RESPONSE_UP	0.0491681	0.120708	0.0941753	0.115995	0.0825467	0.164831	0.029708	0.0574672	0.074014	0.152516	0.0678283	0.0976753	0.095761	0.0623111	0.0746095	0.14469	0.147811	0.0435276	0.0910655	0.16578	0.0772176	0.0781199	0.144992	0.0137451	0.0486316	0.136685	0.126221	0.148056	0.112777	0.0274759	0.173295	0.0970953	0.162669	0.113973	0.112855	0.119077	0.0760744	0.0553237	0.0775819	0.0239609	0.0831637	0.0791239	0.136398	0.0746762	0.139353	0.194314	0.121816	0.137407	0.104851
HALLMARK_COAGULATION	-0.115467	-0.0059976	0.0226632	-0.0228036	2.74221e-05	-0.0725108	-0.138416	-0.0597707	-0.0947463	-0.0560011	-0.0807452	-0.120368	0.0731067	-0.111012	-0.146906	-0.0742832	0.0560651	0.213082	-0.0770468	-0.0728452	-0.102871	-0.0549525	0.0766115	-0.014268	-0.0588427	-0.00960473	-0.0227884	-0.17956	0.222817	-0.135329	0.038044	0.0193124	-0.0383611	-0.0916947	-0.145222	-0.143175	-0.0282773	-0.172916	0.0140725	-0.068867	-0.161802	0.0252876	-0.0498396	-0.0409819	-0.0462914	-0.152969	-0.0764061	-0.0140039	-0.104289
HALLMARK_ADIPOGENESIS	-0.0124859	0.0618911	0.0954199	0.023295	0.0617166	0.112099	0.0392872	0.0322436	0.0710903	0.0122656	0.0174588	0.074658	0.061261	0.153264	0.137521	0.0983046	0.0617379	0.039597	0.114877	-0.0107191	0.0330686	0.0730827	0.112207	0.163865	0.14161	0.0803817	0.099309	0.0379075	0.0491633	0.140688	0.158961	0.0402774	0.142554	0.0784135	0.039201	0.101465	0.13351	0.0447301	0.107726	0.0361366	0.020345	0.0749527	-0.144829	0.0828648	0.092381	0.186068	0.014182	0.0776103	0.0624044
HALLMARK_ALLOGRAFT_REJECTION	0.327208	-0.10397	-0.128857	-0.0882243	-0.0930164	-0.114924	-0.119407	0.394034	0.151493	0.310625	-0.139331	-0.0970324	0.349738	-0.129013	-0.163611	0.250325	-0.0148355	-0.0172739	-0.0658539	0.300623	0.131158	-0.100344	0.0307356	0.0959279	-0.165299	0.325151	-0.0422035	-0.12529	0.19639	0.0212983	0.263696	0.350248	-0.105551	0.428525	-0.0756414	0.239936	0.000339719	0.193145	0.0338561	0.0345583	0.163152	0.0620495	-0.060125	0.131328	0.0280523	-0.125178	0.175539	0.0860489	-0.109617
HALLMARK_UNFOLDED_PROTEIN_RESPONSE	0.140226	0.200849	0.132253	0.085758	0.150885	0.210397	0.173094	0.0500597	0.10075	0.072757	0.135804	0.180512	0.129073	0.162425	0.229623	0.193119	0.150808	0.087644	0.206748	0.131187	0.276062	0.131129	0.132856	0.122293	0.0544971	0.19736	0.187387	0.216417	0.149803	0.197802	0.188678	0.129337	0.218658	0.163038	0.159117	0.215287	0.0407286	0.159212	0.185255	0.105893	0.126069	0.196071	0.0608106	0.117918	0.185667	0.20199	0.194527	0.157401	0.0930586
HALLMARK_PROTEIN_SECRETION	0.0440969	-0.00741339	0.112869	0.0121717	0.0184715	0.101927	0.0495018	-0.0854035	0.103385	-0.0314046	0.0411806	0.128978	-0.0517151	0.205552	0.0867978	0.0958541	0.035008	0.100993	-0.0186785	-0.00154335	0.0201687	0.0887494	0.0984637	0.192217	0.108958	0.0609911	0.0931486	0.0481977	0.00297153	0.136094	0.11616	0.0852307	0.140724	0.0574172	0.0277581	0.142573	0.0746651	0.0614492	0.0440473	-0.0353978	-0.0409444	0.201152	-0.171863	0.00303079	0.0418601	0.192038	0.0798615	-0.0245217	0.0667257
HALLMARK_PANCREAS_BETA_CELLS	0.0273332	-0.174064	-0.135363	-0.205438	-0.191734	-0.182937	-0.207082	-0.148945	-0.267658	-0.281712	-0.288252	-0.194714	-0.311219	-0.234969	-0.184535	-0.239064	-0.238071	-0.202815	-0.246781	-0.223248	-0.221203	-0.248778	0.363905	-0.295611	-0.0926274	-0.186054	-0.213066	-0.0327915	-0.0267641	-0.178534	-0.303604	-0.0563327	-0.270741	-0.142202	-0.205725	-0.257787	-0.143879	-0.27098	-0.3076	-0.128223	-0.227226	-0.200529	0.349346	-0.245563	-0.0678528	-0.260876	-0.208448	-0.190799	-0.178214
HALLMARK_MYOGENESIS	-0.0638912	-0.00907691	0.0637911	-0.000216787	0.0315932	0.0915313	-0.0186145	0.17357	-0.0330087	0.00754196	-0.0145963	-0.0215894	0.0506217	-0.0418628	-0.0709058	-0.0306414	0.0725185	0.0628736	-0.0267163	0.111858	0.0319785	-0.0940974	0.140787	0.110204	0.067907	-0.0346244	0.0816457	-0.0720442	0.150068	-0.107613	-0.157793	-0.0161514	-0.0580092	-0.100142	-0.0568211	0.0792668	0.0925209	0.0511913	-0.0447986	0.00739526	0.0484591	-0.0642718	0.0450787	0.121436	0.110986	0.0181528	-0.0735881	0.0707149	-0.0134183
[truncated: 354 more columns]

## Sheet: Sheet3
HALLMARK	Risk_score	HALLMARK_BILE_ACID_METABOLISM	HALLMARK_FATTY_ACID_METABOLISM	HALLMARK_GLYCOLYSIS	HALLMARK_HEME_METABOLISM	HALLMARK_PEROXISOME	HALLMARK_XENOBIOTIC_METABOLISM	HALLMARK_ANDROGEN_RESPONSE	HALLMARK_ESTROGEN_RESPONSE_EARLY	HALLMARK_SPERMATOGENESIS	HALLMARK_HYPOXIA	HALLMARK_ANGIOGENESIS	HALLMARK_APICAL_JUNCTION	HALLMARK_APICAL_SURFACE	HALLMARK_APOPTOSIS	HALLMARK_TNFA_SIGNALING_VIA_NFKB	HALLMARK_IL2_STAT5_SIGNALING	HALLMARK_IL6_JAK_STAT3_SIGNALING	HALLMARK_INFLAMMATORY_RESPONSE	HALLMARK_INTERFERON_ALPHA_RESPONSE	HALLMARK_INTERFERON_GAMMA_RESPONSE	HALLMARK_COMPLEMENT	HALLMARK_EPITHELIAL_MESENCHYMAL_TRANSITION	HALLMARK_TGF_BETA_SIGNALING	HALLMARK_MYC_TARGETS_V1	HALLMARK_MYC_TARGETS_V2	HALLMARK_MITOTIC_SPINDLE	HALLMARK_G2M_CHECKPOINT	HALLMARK_E2F_TARGETS	HALLMARK_HEDGEHOG_SIGNALING	HALLMARK_KRAS_SIGNALING_DN	HALLMARK_KRAS_SIGNALING_UP	HALLMARK_MTORC1_SIGNALING	HALLMARK_NOTCH_SIGNALING	HALLMARK_PI3K_AKT_MTOR_SIGNALING	HALLMARK_WNT_BETA_CATENIN_SIGNALING	HALLMARK_REACTIVE_OXIGEN_SPECIES_PATHWAY	HALLMARK_UV_RESPONSE_UP	HALLMARK_COAGULATION	HALLMARK_ADIPOGENESIS	HALLMARK_ALLOGRAFT_REJECTION	HALLMARK_UNFOLDED_PROTEIN_RESPONSE	HALLMARK_PROTEIN_SECRETION	HALLMARK_PANCREAS_BETA_CELLS	HALLMARK_MYOGENESIS
TCGA.2F.A9KO.01	-0.327578	0.040907	0.0284159	0.00171226	-0.051555	0.117381	0.100654	0.0808094	0.0210102	-0.0255694	0.0630103	-0.097713	0.0311297	0.157447	0.0716579	0.27206	0.127756	0.119531	0.145472	0.244672	0.416592	0.117383	0.0969653	0.073262	0.106096	0.12731	0.0768283	0.176519	0.231456	-0.0496059	0.0331781	0.150654	0.083748	0.134122	0.0291712	0.0781454	0.15012	0.0491681	-0.115467	-0.0124859	0.327208	0.140226	0.0440969	0.0273332	-0.0638912
TCGA.2F.A9KP.01	-0.472989	-0.0994821	0.0343967	0.144658	-0.0334884	0.150609	0.0951842	0.0905728	0.128942	0.0516122	0.00713675	0.106161	-0.0110659	0.106308	0.0813589	0.18148	0.018743	-0.0812703	-0.184401	-0.0623034	-0.0731872	-0.068963	-0.152846	0.0328661	0.272331	0.392241	0.117496	0.277235	0.326581	-0.142941	0.0441248	0.0121593	0.202028	0.10774	0.120704	0.0763727	0.0360828	0.120708	-0.0059976	0.0618911	-0.10397	0.200849	-0.00741339	-0.174064	-0.00907691
TCGA.2F.A9KQ.01	-0.434308	0.0793949	0.11587	0.168877	0.0464119	0.098146	0.127615	0.119864	0.0934212	0.00872695	0.179896	-0.0933368	0.0870687	0.0554114	0.095061	0.0587119	0.00479982	0.0492402	-0.1295	-0.000629686	-0.107575	-0.0334878	-0.112304	0.147221	0.154429	0.108285	0.103172	0.194507	0.209859	0.0234892	0.0430505	0.0677788	0.076458	0.140956	0.135536	0.0739419	0.00842275	0.0941753	0.0226632	0.0954199	-0.128857	0.132253	0.112869	-0.135363	0.0637911
TCGA.2F.A9KR.01	-0.915113	-0.060472	0.0295535	0.103512	-0.0498452	0.163852	0.0795232	-0.0296057	0.0786546	0.025119	-0.0265738	-0.173261	0.0746066	0.0859369	0.121249	0.110759	-0.0789205	0.0428772	-0.0585726	0.167214	0.0941821	-0.0320509	-0.122884	0.0614383	0.0515449	0.111087	0.0390187	0.178416	0.17878	-0.163618	0.122657	-0.00114161	0.0207598	0.0980142	0.0790969	0.130182	0.125955	0.115995	-0.0228036	0.023295	-0.0882243	0.085758	0.0121717	-0.205438	-0.000216787
TCGA.2F.A9KT.01	-0.904565	-0.12113	-0.0889459	0.152123	0.0323554	0.0998484	-0.0132915	0.0467249	0.0934166	0.0393883	0.157165	-0.254195	0.117126	0.119291	0.162577	0.17723	-0.0141802	-0.0517071	-0.0369471	-0.114232	-0.121747	-0.0359572	0.0763762	0.117664	0.160144	0.256463	0.184637	0.190872	0.261803	-0.27583	0.0347257	0.0772063	0.162805	0.160347	0.12732	0.107624	0.137262	0.0825467	2.74221e-05	0.0617166	-0.0930164	0.150885	0.0184715	-0.191734	0.0315932
TCGA.2F.A9KW.01	-0.280216	0.00103729	0.141867	0.164103	0.0434639	0.082329	0.0741022	0.095108	0.0921111	0.0714208	0.137268	0.28111	0.106525	-0.048805	0.0935636	0.242439	0.0789343	0.132091	0.105351	0.0985196	-0.0559842	0.064968	0.0858939	0.0126844	0.223145	0.296635	0.137709	0.251102	0.338315	-0.0305312	-0.0151595	-0.02079	0.22123	0.206424	0.146022	0.0169276	0.145254	0.164831	-0.0725108	0.112099	-0.114924	0.210397	0.101927	-0.182937	0.0915313
TCGA.4Z.AA7M.01	-0.461258	-0.0150344	0.00962361	0.130751	-0.0776127	0.0987482	0.0890967	0.00296413	0.10231	0.0430878	-0.0563495	-0.279824	0.0415123	0.0359772	0.0805183	-0.0147633	-0.0181685	-0.0561886	-0.185314	-0.0536387	-0.0708801	-0.0567101	0.0193396	-0.0460839	0.12622	0.121218	0.135911	0.249866	0.318847	-0.393429	0.00403951	-0.0224131	0.179535	0.128712	0.0852168	0.110191	0.13108	0.029708	-0.138416	0.0392872	-0.119407	0.173094	0.0495018	-0.207082	-0.0186145
TCGA.4Z.AA7N.01	-0.58488	-0.0556466	-0.0462242	-0.00651675	0.0503295	0.122741	0.00672747	0.139187	0.189772	-0.0400809	0.150902	0.163211	0.233469	0.204486	0.133438	0.418751	0.242895	0.246143	0.302389	0.081216	0.348358	0.217162	0.313775	0.0846107	-0.0638983	-0.120757	0.114352	0.0144204	-0.0856529	-0.0547649	0.131293	0.202554	-0.0921462	0.212519	0.0693198	0.182003	0.142598	0.0574672	-0.0597707	0.0322436	0.394034	0.0500597	-0.0854035	-0.148945	0.17357
TCGA.4Z.AA7O.01	-0.40555	-0.0275909	0.0464289	0.114464	-0.0109552	0.0501542	0.0350903	0.0601231	0.100995	0.0068417	0.0900905	-0.179907	0.119071	0.0918529	0.0820546	0.142279	0.10943	0.0539032	-0.116821	0.158906	0.224547	0.026261	0.0932594	0.216585	0.232813	0.132978	0.111786	0.253496	0.311633	-0.285553	-0.00570829	0.0369141	0.0735175	0.168665	0.117528	0.146635	0.125811	0.074014	-0.0947463	0.0710903	0.151493	0.10075	0.103385	-0.267658	-0.0330087
TCGA.4Z.AA7Q.01	-0.525853	0.0378179	-0.037039	0.122041	0.033906	0.127495	0.0603735	0.0327307	0.102794	0.100648	0.0235019	-0.121681	0.175229	0.12274	0.0966774	0.190256	0.109949	0.106726	0.167695	0.240932	0.407921	0.194075	-0.113995	-0.132419	0.182275	0.120678	0.0413444	0.0990959	0.193185	-0.303523	0.0702232	0.0738677	0.169774	0.0807909	0.096832	0.00159945	0.0929806	0.152516	-0.0560011	0.0122656	0.310625	0.072757	-0.0314046	-0.281712	0.00754196
TCGA.4Z.AA7R.01	-0.671099	-0.0271557	0.108798	0.135407	-0.0117317	0.158407	0.12615	0.0812392	0.0380021	0.0749483	0.0269559	-0.173405	0.0505261	0.0762741	0.0665753	0.0580424	0.0516476	0.0136974	-0.16595	0.00346802	-0.116319	-0.0887498	0.0124091	-0.0513895	0.155669	0.186663	0.134037	0.219422	0.365531	-0.218217	0.042342	-0.0032491	0.160738	0.0647951	0.00112053	0.0605357	0.0267601	0.0678283	-0.0807452	0.0174588	-0.139331	0.135804	0.0411806	-0.288252	-0.0145963
TCGA.4Z.AA7S.01	-0.460154	0.00734532	0.111589	0.19225	0.0401642	0.191259	0.128312	0.0728667	0.137288	0.0423407	0.146633	-0.161191	0.0320103	0.09647	0.0664952	0.111554	-0.0275767	0.0360499	-0.077695	0.00662528	-0.087954	-0.0722245	-0.194893	0.0849718	0.221215	0.116658	0.136201	0.242639	0.347332	-0.0261908	-0.0252317	0.0210332	0.0500103	0.192437	0.120108	0.15993	0.0189946	0.0976753	-0.120368	0.074658	-0.0970324	0.180512	0.128978	-0.194714	-0.0215894
TCGA.4Z.AA7W.01	-0.0824141	-0.00193483	-0.00116216	0.120959	0.000362325	0.120827	0.00334215	-0.00300543	0.0729058	0.0531635	0.0308027	-0.233762	0.136507	0.09046	0.085337	0.288296	0.175089	0.112859	0.149337	0.306379	0.381897	0.10494	-0.00359062	-0.0848532	0.296839	0.251891	0.0361234	0.0892022	0.203628	-0.410953	0.0295134	0.0459623	0.184539	0.118742	0.0977825	0.101856	0.27675	0.095761	0.0731067	0.061261	0.349738	0.129073	-0.0517151	-0.311219	0.0506217
TCGA.4Z.AA7Y.01	-0.233451	-0.124149	0.0518788	0.225637	0.0119827	0.155683	0.142375	0.173347	0.169768	-0.00899569	0.202993	-0.197683	0.0620852	-0.0222294	0.130725	0.197947	0.0673598	0.05978	-0.133073	0.169777	-0.0317529	-0.0127602	-0.144113	0.110259	0.1799	0.0926092	0.16548	0.250756	0.345635	-0.13648	-0.000749341	0.0905529	0.147524	0.0748388	0.199768	0.0488795	0.142583	0.0623111	-0.111012	0.153264	-0.129013	0.162425	0.205552	-0.234969	-0.0418628
TCGA.4Z.AA80.01	-0.191978	0.0213586	0.0588843	0.166106	0.00019845	0.197734	0.139105	0.152646	0.10482	0.0655651	0.0224742	-0.287153	-0.00541689	0.112833	0.0211701	0.188449	0.0129102	-0.0128895	-0.0470717	0.198508	0.067542	-0.0198926	-0.294117	-0.0169008	0.219056	0.272813	0.112192	0.302135	0.380075	-0.00128978	-0.0104507	-0.0293164	0.213189	0.106823	0.132573	0.0233139	0.0241856	0.0746095	-0.146906	0.137521	-0.163611	0.229623	0.0867978	-0.184535	-0.0709058
TCGA.4Z.AA81.01	-0.105835	-0.125897	-0.0801563	0.151574	0.024081	0.166457	-0.0396955	0.0385213	0.135258	0.00815818	0.047576	-0.11559	0.123808	0.191107	0.111265	0.139415	0.100462	-0.0459747	-0.0345373	0.318694	0.391315	0.0321292	-0.124967	0.138736	0.330295	0.311341	0.234066	0.2126	0.361287	-0.236048	-0.0498389	0.0846802	0.249411	0.197077	0.190823	0.117392	0.16992	0.14469	-0.0742832	0.0983046	0.250325	0.193119	0.0958541	-0.239064	-0.0306414
TCGA.4Z.AA82.01	-0.118379	-0.0642488	-0.00894283	0.138433	0.0108486	0.116918	-0.0808203	0.0475422	0.111766	0.0123195	0.182097	-0.340794	0.163215	0.16701	0.181255	0.261598	0.0748078	0.235914	0.0475333	0.117736	0.188946	0.0689949	0.249953	0.10316	0.193199	0.318719	0.122478	0.239185	0.312359	-0.0568993	0.0681493	0.0483178	0.230254	0.23677	0.0850058	-0.0734142	0.0743854	0.147811	0.0560651	0.0617379	-0.0148355	0.150808	0.035008	-0.238071	0.0725185
TCGA.4Z.AA83.01	-0.520153	0.0556295	0.0471248	0.154512	0.0101525	0.199483	0.11103	0.076637	0.141284	-0.0436533	0.216457	-0.0288881	0.0928652	0.190232	0.096914	0.298183	0.0923436	0.14549	0.00806246	0.315802	0.162195	-0.0294284	0.00710155	0.0597926	0.103544	0.201501	0.0939914	-0.00220513	-0.0729313	-0.0485556	0.0240694	0.0920114	-0.00294977	0.155001	0.151929	0.0127376	0.138726	0.0435276	0.213082	0.039597	-0.0172739	0.087644	0.100993	-0.202815	0.0628736
TCGA.4Z.AA84.01	-0.503051	0.0161408	0.0322257	0.153673	-0.00227452	0.140591	-0.0524056	0.0279185	0.0717352	0.100566	0.0796053	-0.0268789	0.00730933	-0.00123261	0.0842737	0.143153	-0.0369784	0.0191971	-0.185606	-0.0354074	-0.139494	-0.0515984	0.0350992	0.0902113	0.267083	0.36066	0.100704	0.178346	0.316414	-0.0971005	0.0406779	0.0192282	0.28939	0.118456	0.0824389	-0.0542975	0.206353	0.0910655	-0.0770468	0.114877	-0.0658539	0.206748	-0.0186785	-0.246781	-0.0267163
TCGA.4Z.AA86.01	-0.116713	-0.0727701	-0.0502833	0.10711	0.0314959	0.0661985	-0.091966	0.0728513	0.0519454	-0.0282689	0.210019	-0.0798191	0.139836	0.127863	0.219103	0.258964	0.26073	0.157128	0.286939	0.213088	0.381083	0.187102	0.324417	0.163837	0.12724	0.172558	0.186349	0.280958	0.351746	-0.0608864	-0.00715458	0.156074	0.212407	0.109469	-0.00404185	0.266987	0.131933	0.16578	-0.0728452	-0.0107191	0.300623	0.131187	-0.00154335	-0.223248	0.111858
TCGA.4Z.AA87.01	-0.441245	-0.020455	0.153318	0.130721	-0.0112097	0.200627	0.101382	0.048144	0.071176	0.0796622	0.00404966	-0.212951	-0.0305128	-0.00594522	0.0559018	0.051828	0.0533358	-0.0513217	-0.0932295	-0.199224	0.0494538	-0.0183052	-0.109267	0.0167329	0.343432	0.286941	0.141326	0.246272	0.344052	-0.234386	-0.0285835	-0.0792774	0.208493	0.196221	0.050904	0.100729	0.154097	0.0772176	-0.102871	0.0330686	0.131158	0.276062	0.0201687	-0.221203	0.0319785
TCGA.4Z.AA89.01	-0.936442	-0.013532	0.0800447	0.130955	-0.0595114	0.146503	0.10236	0.0262837	0.0986921	-0.0656704	0.0187154	-0.312083	0.017097	0.0832667	0.116403	0.172315	-0.0437197	0.0936504	-0.255713	0.250564	0.130006	-0.106981	-0.231573	0.110113	0.23314	0.195813	0.0539212	0.15756	0.154163	-0.12537	0.00502734	0.0508212	0.0959243	0.0491764	0.120586	0.0347205	0.108807	0.0781199	-0.0549525	0.0730827	-0.100344	0.131129	0.0887494	-0.248778	-0.0940974
TCGA.5N.A9KI.01	-0.211917	0.027323	0.150499	0.221893	0.0584761	0.143288	0.155145	0.125682	0.0963086	0.0201862	0.110125	0.125681	0.148463	0.1989	0.0854861	0.195163	0.0765664	0.203616	0.0848513	0.323084	0.253325	0.0684205	0.19705	-0.076589	0.133077	0.0749389	0.0423925	0.00291417	0.110323	-0.0718628	0.0817864	0.0636612	0.16279	0.177435	0.0817417	0.000994972	0.210568	0.144992	0.0766115	0.112207	0.0307356	0.132856	0.0984637	0.363905	0.140787
TCGA.5N.A9KM.01	-0.221034	0.0953345	0.167946	0.186167	0.0498666	0.261919	0.113444	0.167626	0.154812	0.00791327	0.00987402	-0.290747	0.0103795	0.0573907	0.0752531	0.146316	0.0584834	0.0869649	0.00326025	0.190866	0.171754	-0.00561184	0.0501959	0.0202418	0.159479	0.0400197	-0.00588665	-0.00314979	0.0225179	-0.225014	-0.0100928	0.0991338	0.185132	0.0727014	0.0929283	0.00618584	0.14801	0.0137451	-0.014268	0.163865	0.0959279	0.122293	0.192217	-0.295611	0.110204
TCGA.BL.A0C8.01	-0.339542	0.0892303	0.184306	0.182709	0.164523	0.127529	0.122744	0.0998112	0.140967	0.0358978	0.124563	0.10317	0.105707	0.151454	0.0187088	-0.047874	0.0620498	0.145202	0.0461744	0.150922	0.0733516	0.0619764	-0.100507	0.10143	0.0174802	-0.0973526	0.134647	0.181805	0.224394	0.0581205	-0.0215632	0.0259031	0.0129129	0.191848	0.12684	-0.0663796	0.0270162	0.0486316	-0.0588427	0.14161	-0.165299	0.0544971	0.108958	-0.0926274	0.067907
TCGA.BL.A13I.01	-0.155265	-0.115857	0.0881409	0.102836	0.0316148	0.0566208	0.0410016	0.124261	-0.0346173	0.091918	0.0853481	0.218982	0.137641	-0.0906906	0.193184	0.177715	0.223631	0.419947	0.289018	0.242596	0.273851	0.185885	0.228316	0.0880293	0.315724	0.358621	0.126023	0.231234	0.350114	0.0174145	-0.0337634	0.156449	0.28306	0.0389002	0.131695	-0.00668218	0.295293	0.136685	-0.00960473	0.0803817	0.325151	0.19736	0.0609911	-0.186054	-0.0346244
TCGA.BL.A13J.01	-0.147629	0.119932	0.0526378	0.161031	0.0566494	0.0886727	0.0164377	0.0806383	0.096343	0.0844894	0.244991	-0.244207	0.116102	0.085883	0.129871	0.117576	0.0447596	-0.0044886	-0.171805	-0.112358	-0.0071277	0.0116966	0.246724	0.0750852	0.157999	-0.00689135	0.114769	0.178945	0.190681	-0.139749	0.0496031	0.0745388	0.0924401	0.127218	0.0869746	0.0883481	0.0727779	0.126221	-0.0227884	0.099309	-0.0422035	0.187387	0.0931486	-0.213066	0.0816457
TCGA.BL.A3JM.01	-0.291406	0.0644109	0.0519183	0.0769317	0.0592902	0.0672466	0.000419881	-0.0280394	0.0824963	0.0786727	0.047791	0.0238424	-0.0227577	0.0687949	-0.0922252	-0.11122	0.0588299	0.03082	-0.263344	-0.0405035	0.0328863	0.0306201	0.121253	0.0760544	0.251511	0.272244	0.150815	0.335109	0.462122	0.191305	-0.0105028	0.0575937	0.189088	-0.0317805	0.110822	0.261109	-0.00842619	0.148056	-0.17956	0.0379075	-0.12529	0.216417	0.0481977	-0.0327915	-0.0720442
TCGA.BL.A5ZZ.01	-0.142726	-0.0112611	0.0547928	0.116729	0.0534691	0.135011	0.111479	0.0574759	0.0274954	0.0355964	0.187632	0.487795	0.303306	0.11567	0.162336	0.355422	0.283262	0.219036	0.313878	-0.0171291	0.0114452	0.192019	0.450754	0.221397	0.219	0.23044	0.0771475	0.180618	0.240397	0.102252	0.0379079	0.225381	0.265361	0.0943812	0.0324129	0.264675	0.186903	0.112777	0.222817	0.0491633	0.19639	0.149803	0.00297153	-0.0267641	0.150068
TCGA.BT.A0S7.01	-0.10984	-0.0833944	0.166769	0.0498603	0.0364258	0.150468	-0.0349616	0.0599564	0.0129916	0.0604696	0.0592871	-0.0855492	0.0741267	0.0232432	0.0974313	0.130963	0.0163109	0.0425898	-0.0936355	-0.144027	-0.194133	-0.0156178	0.131531	0.0631754	0.365223	0.293332	0.0787269	0.330891	0.394149	-0.226062	0.0600847	0.0673779	0.219394	0.0414643	0.128154	-0.0174843	0.0450289	0.0274759	-0.135329	0.140688	0.0212983	0.197802	0.136094	-0.178534	-0.107613
TCGA.BT.A0YX.01	-0.0768257	-0.0544963	0.116839	0.197455	0.0763356	0.0919197	0.119079	0.131588	0.0738569	-0.00206135	0.00441333	-0.246845	0.135478	-0.0190661	0.0644168	0.238559	0.125744	-0.0184462	0.199313	0.280029	0.148326	0.134497	-0.0531202	0.0417609	0.239074	0.266728	0.130589	0.253633	0.325123	-0.244636	-0.0229329	0.0932818	0.239076	0.170068	0.18736	-0.0713573	0.2281	0.173295	0.038044	0.158961	0.263696	0.188678	0.11616	-0.303604	-0.157793
TCGA.BT.A20J.01	-0.1171	-0.0476445	-0.0287586	0.169817	-0.00496334	0.0659695	-0.0977826	0.126292	0.00409835	0.140178	0.172294	-0.160763	0.133305	-0.0870091	0.0878288	0.154709	0.158223	0.167275	0.20084	0.0506526	0.228158	0.197077	-0.00367115	0.0948287	0.275379	0.288276	0.101334	0.24247	0.289998	0.0178347	0.0795635	0.0972711	0.221852	0.185374	0.10379	0.0645762	0.177068	0.0970953	0.0193124	0.0402774	0.350248	0.129337	0.0852307	-0.0563327	-0.0161514
TCGA.BT.A20N.01	-0.173542	-0.15956	0.0473565	0.170563	0.053436	0.215571	0.0480741	0.123239	0.162131	0.0497649	0.0221051	-0.265384	0.0960041	-0.0698124	0.0649374	0.079672	0.0495117	0.00519479	-0.241675	-0.0997698	-0.120502	0.00109027	0.125097	0.0964388	0.291761	0.338833	0.139037	0.319575	0.378875	-0.282067	0.00580097	0.029851	0.232071	0.10267	0.125324	0.00658977	0.00271197	0.162669	-0.0383611	0.142554	-0.105551	0.218658	0.140724	-0.270741	-0.0580092
TCGA.BT.A20O.01	-0.17814	-0.143125	0.0473165	0.0814142	0.0494159	0.00756761	0.0280904	0.135488	-0.0675617	0.0282482	0.105744	0.0285471	0.10866	0.0108558	0.23202	0.252757	0.290125	0.365927	0.342498	0.389547	0.492999	0.278305	0.345031	0.0244378	0.201797	0.28043	0.15417	0.271036	0.359026	0.0131366	-0.0415082	0.19841	0.221372	0.0520976	0.108149	-0.0153785	0.229643	0.113973	-0.0916947	0.0784135	0.428525	0.163038	0.0574172	-0.142202	-0.100142
TCGA.BT.A20P.01	-0.616675	-0.0329042	0.0647078	0.136104	0.00379894	0.159718	0.139721	0.0460084	0.00562396	0.0354014	0.069236	0.0240486	0.060912	0.0502084	0.0922741	0.139069	0.0497993	0.0832515	-0.179944	0.117803	-0.0293237	-0.0765494	-0.122074	-0.0173227	0.159233	0.149744	0.0930739	0.111569	0.211789	-0.000577408	0.0175731	-0.0147031	0.0558204	-0.00144101	0.133878	0.0650836	0.166608	0.112855	-0.145222	0.039201	-0.0756414	0.159117	0.0277581	-0.205725	-0.0568211
TCGA.BT.A20Q.01	-0.338599	-0.036281	0.000833647	0.158389	-0.0051275	0.132647	0.108483	0.159194	0.17072	-0.0454968	0.0547084	-0.205386	0.133381	0.0412277	0.168792	0.172528	0.137123	0.143872	0.0307629	0.235788	0.316112	0.117507	0.292245	0.115453	0.0815315	-0.0043103	0.121405	0.109532	-0.021242	-0.0967435	0.0117938	0.159418	0.11932	0.180754	0.11292	0.139811	0.0752882	0.119077	-0.143175	0.101465	0.239936	0.215287	0.142573	-0.257787	0.0792668
TCGA.BT.A20R.01	-0.218476	0.039739	0.0841008	0.204319	0.0314325	0.110932	0.0576652	0.114593	0.115164	0.0388722	0.140976	0.0665009	0.154991	0.0607462	0.12341	0.198438	0.112344	0.00282048	0.138615	0.127728	0.212012	0.0961706	0.428329	0.0846651	0.106927	0.00895502	0.0616825	0.137698	0.19537	-0.133004	0.0751162	0.144459	0.0783104	0.251923	0.0221332	-0.0494834	0.121059	0.0760744	-0.0282773	0.13351	0.000339719	0.0407286	0.0746651	-0.143879	0.0925209
TCGA.BT.A20T.01	-0.250865	0.0274578	0.0362515	0.127954	-0.0258797	0.151456	0.106024	0.0648152	0.0996323	-0.0322796	0.062121	-0.164134	0.132283	0.114266	0.207071	0.269232	0.0727301	0.119915	-0.0939865	0.245227	0.256164	0.0110732	0.265931	0.0892563	0.196764	0.22012	0.0628502	0.136518	0.183131	-0.015794	0.0552444	0.113733	0.138712	0.185893	0.128845	0.162107	0.0881752	0.0553237	-0.172916	0.0447301	0.193145	0.159212	0.0614492	-0.27098	0.0511913
TCGA.BT.A20U.01	-0.0841234	-0.0821311	0.0548778	0.197591	0.0456746	0.0600835	0.0648342	0.128918	0.140377	-0.0201093	0.0448728	-0.200294	0.162356	0.0889774	0.0410727	0.158215	0.0995269	-0.0270344	0.0603425	0.108469	0.100231	0.0505933	0.184173	0.19011	0.3222	0.37753	0.159882	0.371147	0.402846	-0.0470211	0.00509543	0.104255	0.199799	0.12091	0.104867	0.0551318	0.121518	0.0775819	0.0140725	0.107726	0.0338561	0.185255	0.0440473	-0.3076	-0.0447986
TCGA.BT.A20V.01	-0.457474	-0.0540986	-0.0582317	0.149445	0.0400393	0.0597199	0.00128116	0.0141299	0.0861926	0.0345351	0.0727247	-0.200314	0.082591	0.223561	0.147656	0.0690969	0.0928908	0.229352	0.0228052	0.0211424	0.0665137	0.0603038	-0.122943	0.0284864	0.214644	0.215019	0.109225	0.245822	0.373702	-0.0477879	0.0928552	0.0820794	0.19375	-0.0271236	0.031134	0.143241	-0.0615054	0.0239609	-0.068867	0.0361366	0.0345583	0.105893	-0.0353978	-0.128223	0.00739526
TCGA.BT.A20W.01	-0.558178	0.00417882	0.0791028	-0.012109	0.0148105	0.0620764	0.134702	0.108974	0.198198	0.0323353	0.0197624	-0.191178	0.0672456	0.187607	0.0635204	0.16302	0.154229	0.250835	0.0305854	-0.0339657	0.14951	-0.0484413	-0.010456	0.0835901	0.219908	0.247487	0.0931707	0.199539	0.31057	-0.0734083	0.105908	0.0176484	0.141817	0.140719	0.1053	0.135277	0.0243315	0.0831637	-0.161802	0.020345	0.163152	0.126069	-0.0409444	-0.227226	0.0484591
TCGA.BT.A20X.01	-0.0501442	-0.154313	-0.00281879	0.137424	0.0630658	0.175121	-0.0634118	0.070715	0.00752501	0.0406537	0.0766404	-0.0793958	0.137171	0.0305888	0.211949	0.272332	0.130234	0.0940681	0.0879544	0.180019	0.0738831	0.0597831	0.203062	0.126574	0.287575	0.394383	0.143216	0.217604	0.274547	-0.0635641	-0.0112232	0.0423107	0.211265	0.114164	0.0873478	-0.157623	0.172457	0.0791239	0.0252876	0.0749527	0.0620495	0.196071	0.201152	-0.200529	-0.0642718
TCGA.BT.A2LA.01	-0.259533	-0.186832	-0.0675413	-0.00753183	0.0421235	0.173761	-0.101799	-0.0338357	0.0276545	0.151828	-0.00958404	-0.112758	0.0800007	0.0467069	0.112463	-0.0653444	-0.101352	-0.222653	-0.11736	-0.1898	-0.219916	-0.000638538	0.0103917	-0.000548495	0.185208	0.195919	0.0203701	0.253345	0.291858	0.328689	0.129339	0.0263148	0.097133	0.0936492	0.0865286	0.185264	-0.0265569	0.136398	-0.0498396	-0.144829	-0.060125	0.0608106	-0.171863	0.349346	0.0450787
TCGA.BT.A2LB.01	-0.24713	-0.114405	0.117006	0.1586	0.0188984	0.0560353	0.104144	0.0796273	0.128458	-0.042405	0.185415	0.0311824	0.199047	0.114886	0.12596	0.267776	0.15905	0.0901188	0.137402	0.192382	0.265994	0.0746901	0.267094	0.035696	0.184352	0.270456	0.105196	0.150388	0.184239	-0.218755	0.0256765	0.10175	0.15084	0.208091	0.0892995	0.136374	0.114563	0.0746762	-0.0409819	0.0828648	0.131328	0.117918	0.00303079	-0.245563	0.121436
TCGA.BT.A2LD.01	-0.139574	-0.0150417	-0.0261861	0.137891	0.0643853	0.147821	0.040817	0.0560079	0.0731104	0.0618504	0.0391319	0.0556821	0.193569	0.0654572	0.0680244	0.169467	0.0489179	0.176056	-0.14143	0.0852389	0.079444	-0.0521467	0.126696	0.152557	0.19952	0.154458	0.145547	0.235531	0.267065	-0.011547	0.0655292	-0.0424247	0.133209	-0.0951859	0.145594	0.115128	0.214271	0.139353	-0.0462914	0.092381	0.0280523	0.185667	0.0418601	-0.0678528	0.110986
TCGA.BT.A3PH.01	-0.205806	-0.0791039	0.0135031	0.211516	0.0713896	0.249564	0.105257	0.141286	0.0819572	0.0562914	0.176869	-0.170654	0.0750183	0.0261166	0.133904	0.182855	-0.0059592	0.109228	-0.100626	-0.103222	-0.0733754	-0.0394095	-0.109335	0.135511	0.223992	0.15709	0.14856	0.244273	0.29314	-0.170279	0.0286956	0.0476273	0.237872	0.161473	0.169283	0.0496143	0.190018	0.194314	-0.152969	0.186068	-0.125178	0.20199	0.192038	-0.260876	0.0181528
TCGA.BT.A3PJ.01	-0.131938	-0.0488481	-0.0743693	0.1435	0.0263223	0.0906543	-0.0270873	0.0310492	0.0679934	0.0900414	0.0794775	-0.254924	0.149957	0.0244135	0.228994	0.210315	0.176408	0.128319	0.157054	0.161848	0.23047	0.107756	0.185954	0.120292	0.241837	0.270725	0.203115	0.309169	0.375015	-0.255208	0.00622096	0.0890479	0.218702	-0.00223842	0.163733	0.130464	-0.037441	0.121816	-0.0764061	0.014182	0.175539	0.194527	0.0798615	-0.208448	-0.0735881
TCGA.BT.A3PK.01	-0.0649756	-0.0739088	-0.0173507	0.150324	0.00518579	0.11433	-0.00415387	0.0323692	0.0476271	0.059592	0.206293	0.212275	0.216666	0.145973	0.203652	0.342746	0.203568	0.108949	0.342735	0.107338	0.201711	0.154137	0.319961	0.139787	0.173927	0.23922	0.135495	0.169964	0.271981	0.126856	0.0458151	0.109926	0.257007	0.167949	0.0925942	0.122548	0.185144	0.137407	-0.0140039	0.0776103	0.0860489	0.157401	-0.0245217	-0.190799	0.0707149
TCGA.BT.A42C.01	-0.651013	0.0305416	0.0812687	0.143718	0.0168385	0.19779	0.177519	0.144937	0.130649	0.0502408	0.101023	-0.298749	0.0297326	0.189524	0.0786523	0.179805	-0.0467036	0.00732514	-0.0611592	0.016692	0.0358084	0.0472481	-0.198125	-0.00988151	0.184567	0.253593	0.0844741	0.170818	0.259923	-0.164383	0.0719466	0.00786496	0.200332	0.0585122	0.145231	0.0994162	0.0349575	0.104851	-0.104289	0.0624044	-0.109617	0.0930586	0.0667257	-0.178214	-0.0134183
TCGA.BT.A42E.01	-0.074194	-0.190321	-0.026273	0.0466969	-0.00465568	0.0611435	-0.0515458	0.0566722	0.0247675	0.00716116	0.13753	-0.247012	0.150248	0.139628	0.104133	0.308123	0.174654	-0.0733351	0.24135	0.378771	0.335303	0.125871	0.0884757	0.0231468	0.249513	0.334543	0.0445638	0.233042	0.315899	-0.11129	0.0765282	0.0232504	0.290521	-0.015255	0.0527082	-0.0997107	0.140928	0.119933	-0.0113015	0.0145056	0.290905	0.115741	0.0300372	-0.215633	-0.0251951
TCGA.BT.A42F.01	-0.104146	0.00497704	0.0584595	0.164354	0.0388655	0.157711	0.0612812	0.0283464	0.10977	-0.0137621	0.113082	0.0453831	0.0718565	0.00919204	0.0443297	0.287436	0.183032	0.0359183	0.280274	0.20843	0.328985	0.146246	-0.0748604	-0.00363222	0.328457	0.403113	0.023782	0.17616	0.203217	-0.312013	-0.072503	0.0596562	0.28575	0.0762914	0.121737	0.0230305	0.261655	0.144547	0.0554073	0.125052	0.355557	0.171561	0.0200284	-0.211327	-0.0729912
TCGA.C4.A0EZ.01	-0.306023	0.0288612	0.0216581	0.0274582	0.0134486	0.132886	-0.0101478	-0.0550206	0.114713	0.196466	0.0164038	0.117446	0.130733	0.111336	0.0299426	-0.297955	-0.0804564	-0.125118	-0.186193	-0.282784	-0.196509	-0.0684651	-0.0686703	0.00211057	0.232981	0.0844171	0.127935	0.319458	0.41173	0.221084	0.156808	-0.0329926	0.13275	-0.0398672	0.0179685	0.0790979	-0.0996401	0.129733	-0.00649405	-0.0393986	-0.144568	0.102429	-0.0677091	0.352233	0.11336
TCGA.C4.A0F0.01	-0.00608119	-0.060464	0.115317	0.198852	0.0417586	0.0648235	-0.00636419	0.172499	-0.00814997	0.0584813	0.00836142	0.179558	0.133999	-0.053825	0.0984247	0.13374	0.157526	0.241435	0.106899	0.0189894	0.0783498	0.0695764	0.214303	0.165252	0.467038	0.471388	0.0817004	0.348879	0.414049	-0.2252	-0.095905	0.0325803	0.286368	-0.0781053	0.170369	-0.0489209	0.158367	0.170623	-0.0729545	0.11897	0.148663	0.211061	0.200449	-0.0636026	-0.0283235
TCGA.C4.A0F1.01	-0.0210999	-0.0865481	0.0480668	0.136969	0.0641781	0.139833	0.00259268	0.0827599	0.0139518	0.0869082	0.147585	-0.211799	0.17305	0.0745785	0.204718	0.225429	0.0546608	0.157638	0.0540027	0.0943351	0.096117	0.0813672	0.188059	0.126092	0.28662	0.314044	0.126345	0.23179	0.225078	-0.000511834	-0.021049	0.0419001	0.153909	0.113567	0.151784	-0.0353579	0.0932267	0.153612	0.0245887	0.0877527	0.0101984	0.185489	0.129868	-0.159942	-0.0987444
TCGA.C4.A0F6.01	-0.213762	-0.0155888	0.0485706	0.191454	0.0101553	0.16145	0.0848491	0.0716396	0.118145	-0.0487692	0.0344456	-0.202449	0.0350316	-0.0936858	0.0660559	0.0120663	0.0290786	0.0201352	-0.148724	-0.126204	-0.0683259	0.0265167	0.145203	0.110511	0.276633	0.22589	0.111187	0.27934	0.296566	-0.0410462	-0.000842792	0.0690266	0.136317	0.184693	0.106636	0.108736	-0.00973193	0.0580091	-0.0735958	0.123298	-0.0355606	0.137419	0.0676508	-0.301505	-0.0177174
TCGA.C4.A0F7.01	-0.114431	-0.0637606	0.0633032	0.0498006	0.0369608	0.169752	0.00990827	0.123481	0.0383034	0.114496	0.130804	-0.0804812	0.10679	0.00244584	0.0357974	0.153587	0.107622	0.0183786	-0.0326695	-0.105615	-0.156276	0.0222652	0.0808773	0.0498474	0.318692	0.280849	0.115933	0.357556	0.402558	-0.199132	0.0486464	0.0246189	0.270266	-0.00987121	0.146577	0.164513	0.0846765	0.127338	-0.108629	0.09782	-0.107437	0.215065	0.0866328	-0.134482	-0.0224413
TCGA.CF.A1HR.01	-0.327728	-0.0597872	0.144414	0.250879	0.0197418	0.249298	0.128836	0.149716	0.176649	0.0034232	-0.0232581	-0.19867	0.0839769	0.100664	0.190193	0.226861	0.0309354	0.196124	-0.0474516	0.138695	0.150956	-0.00612013	-0.160735	-0.0246749	0.0968235	0.157898	0.0910013	0.132112	0.202757	-0.0258728	0.0672075	0.0517196	0.137935	0.0608644	0.183331	0.102813	0.14753	0.0116343	-0.087966	0.129834	0.0721713	0.179896	0.112934	-0.311718	0.0582941
TCGA.CF.A1HS.01	-0.0979892	-0.19759	0.0538556	0.0357274	0.0289368	0.0984943	-0.0592835	0.0406487	0.085158	0.0130857	0.138821	-0.223154	0.133491	0.192429	0.124799	0.237753	0.120661	0.0403574	0.124294	0.098086	0.12472	0.113233	0.20207	0.0550354	0.289501	0.3727	0.196818	0.312708	0.397029	0.00441496	0.0373328	0.0566771	0.267473	0.038742	0.091224	0.0700872	0.0263149	0.141018	-0.111627	0.0160521	0.00812435	0.189574	0.0610967	-0.111218	-0.0899008
TCGA.CF.A27C.01	-1.06729	-0.0758189	0.0456045	0.174655	0.0222932	0.118217	0.0782512	0.106098	0.151822	-0.00762193	0.0679353	-0.172411	0.0797961	0.0217795	0.0927515	0.101543	0.0222565	0.08933	-0.226683	0.115862	0.101835	-0.03554	-0.277891	0.115849	0.21256	0.243003	0.108011	0.180306	0.0972194	-0.151191	0.0158701	0.00353185	0.112861	0.0631978	0.0929596	0.12038	0.143517	0.113493	-0.0253374	0.041834	-0.0753111	0.132891	0.103509	-0.284849	-0.0875086
TCGA.CF.A3MF.01	-1.01899	0.0379641	0.116038	0.0835136	0.0262433	0.0731047	0.0919276	-0.00257188	0.101282	0.0373959	0.106727	-0.192264	0.0625661	0.133615	-0.0175137	0.0891541	-0.0414516	0.12273	-0.115635	0.0530554	-0.0690945	-0.101581	-0.187702	0.0567579	-0.012012	0.139723	0.10365	0.0819413	0.0638617	-0.0832269	0.0316251	-0.026848	-0.0636298	0.0416701	0.0641828	0.00567175	0.00535955	0.0249247	-0.0626003	0.0692042	-0.115671	0.0851277	-0.0394348	-0.247928	0.121522
TCGA.CF.A3MG.01	-0.335595	-0.0591083	0.102949	0.250078	0.0385004	0.228289	0.0917278	0.14175	0.197166	0.0613912	0.142784	-0.303892	0.0918504	0.0726867	0.14024	0.0904706	-0.00684126	0.0983936	-0.184938	0.0254628	0.00578264	-0.0158562	-0.250511	0.15028	0.234497	0.150269	0.141015	0.249945	0.289198	-0.161481	0.0124893	0.0441179	0.161701	0.0431723	0.211999	0.101405	0.192514	0.107053	-0.0364639	0.0945348	-0.14097	0.147677	0.139277	-0.254506	-0.023591
TCGA.CF.A3MH.01	-0.75779	-0.0157973	0.0966087	0.188304	-0.0125571	0.144587	0.0562655	0.0782652	0.167256	-0.00412534	0.0903271	-0.274235	0.0742426	0.134547	0.179591	0.148659	0.0453181	0.0372779	-0.181613	0.113886	-0.0331297	-0.0224669	-0.168461	0.10683	0.216007	0.223213	0.107957	0.106787	0.152419	-0.192857	0.075346	0.0439194	0.0817179	0.0232428	0.155439	0.138904	0.199113	0.0865036	-0.0773317	0.0792289	-0.106	0.107651	-0.0190152	-0.299614	0.0641392
TCGA.CF.A3MI.01	-0.429828	-0.140908	0.0307604	0.112406	0.0237222	0.129046	0.0577883	0.0219471	0.145329	0.00435744	0.0364559	-0.11574	0.131591	0.0258147	0.12995	0.217647	0.0782635	0.133572	-0.0315761	0.0433593	0.0597287	-0.0437165	-0.160037	0.0619661	0.207434	0.252878	0.0759454	0.0561413	0.0938043	-0.102644	-0.00926449	-0.0079803	0.136151	0.139489	0.138967	0.0901428	0.215415	0.0815447	-0.0213115	0.0628428	-0.0756641	0.133587	-0.0130935	-0.17213	0.0697918
TCGA.CF.A47S.01	-0.891659	-0.0140288	0.175264	0.153882	0.0310176	0.133698	0.170461	0.0794477	0.134372	-0.0140303	0.0776648	-0.250785	0.0240615	0.132528	0.137723	0.191228	0.0570092	0.145555	-0.130445	0.227876	0.14346	-0.0208476	-0.14682	0.0906181	0.201361	0.199784	0.0492226	-0.0633273	-0.11554	-0.169356	-0.0138935	0.00983788	0.0543895	0.0802856	0.0830047	0.0985922	0.188892	0.1038	0.0107039	0.0954642	-0.0240091	0.0966861	0.0485969	-0.21122	0.00955206
TCGA.CF.A47T.01	-0.69507	-0.0130885	0.122856	0.133676	-0.0116022	0.107977	0.143201	0.0693126	0.0642821	0.00692716	-0.0245972	-0.277506	0.0482907	0.0723472	0.158791	0.0863127	-4.41806e-05	0.0946765	-0.25521	0.0280947	-0.0710291	-0.0996787	-0.0783127	0.0368043	0.327781	0.350366	0.0595752	0.141642	0.224954	-0.121548	0.0210338	0.0161854	0.213637	0.0427778	0.148476	0.187042	0.130299	0.0849959	-0.0628723	0.0642813	-0.0829527	0.133243	-0.0452248	-0.181843	0.0341759
TCGA.CF.A47V.01	-1.49976	-0.0189598	0.0909093	0.060261	0.0226507	0.0376842	0.123704	0.00128687	0.116645	-0.0183995	0.105352	-0.171944	0.0991515	0.134137	0.0582631	0.158329	0.0580333	0.183215	-0.0671508	0.265294	0.204757	-0.0585743	-0.0986754	0.0638502	0.00383739	0.0604567	0.0741521	0.0363971	-0.00786771	-0.155237	0.049729	0.0788941	-0.0676447	0.0814538	0.0881383	0.0565304	0.0805248	0.062529	-0.0118616	0.068427	-0.0796175	0.0211509	-0.0532835	-0.183347	0.0905287
TCGA.CF.A47W.01	-1.39547	-0.146761	0.125219	0.136539	0.0383175	0.0962458	0.122456	0.0257654	0.0745053	0.0290467	0.0419895	0.0112846	0.0878433	-0.0214336	0.0910174	0.0776239	0.0287807	0.177998	-0.222617	0.0693976	-0.0990289	-0.1015	-0.213788	0.0177955	0.303406	0.330449	0.0323532	0.0479163	0.0746485	-0.0749561	-0.0345267	-0.126541	0.155922	0.109648	0.111731	0.0940632	0.282776	0.133063	0.0194421	0.0933432	-0.0826552	0.153358	-0.00215099	-0.185181	0.0420465
TCGA.CF.A47X.01	-1.01212	-0.0761485	0.064169	0.114075	0.0300778	0.120952	0.0656639	0.147667	0.106797	0.0120845	-0.0310391	-0.0422579	-0.00072732	0.00826706	0.0443846	0.205653	0.0396504	0.0883726	-0.231368	-0.0456673	0.00296907	-0.0278314	-0.289671	0.156758	0.189834	0.263382	0.119567	0.0755369	-0.0471371	-0.0389252	-0.0155864	-0.0141858	0.134272	0.106139	0.212461	0.076234	0.0681925	0.0762623	-0.192654	0.0527033	-0.13208	0.168254	0.104182	-0.184824	-0.0424387
TCGA.CF.A47Y.01	-1.37324	-0.0910113	0.113026	0.116184	0.0180773	0.0808354	0.0867138	-0.00147077	0.075774	-0.0136824	0.0965301	-0.156483	0.0695124	-0.0727523	0.0764935	0.0928869	0.00796772	0.152056	-0.258911	0.121743	-0.0280233	-0.114273	-0.128499	0.105353	0.134812	0.114267	0.0410888	-0.0495397	-0.114325	-0.0684527	-0.00295061	-0.0596673	0.015906	0.000851962	0.105625	0.127543	0.177795	0.0638308	-0.0353828	0.0816351	-0.0766758	0.0572204	0.0482427	-0.230724	0.0570781
TCGA.CF.A5U8.01	-1.69225	0.0016558	0.110698	0.150706	0.00737055	0.0774918	0.141446	0.0697349	0.136254	-0.0087251	0.00083254	-0.212811	0.0208288	0.0852637	0.174288	0.0884901	0.0170825	0.108358	-0.314455	0.0673988	0.0304713	-0.097515	-0.145521	0.0610572	0.216806	0.273264	0.035042	-0.0338842	-0.0775821	-0.106605	-0.0306756	-0.0615175	0.0989405	0.0644675	0.125366	0.0620207	0.12461	0.053322	-0.00890043	0.0953731	-0.0414776	0.121687	0.101593	-0.152986	-0.0473283
TCGA.CF.A5UA.01	-0.557174	-0.0705469	0.109057	0.149659	-0.0417033	0.159504	0.124592	0.0597295	0.0981957	-0.0228227	0.0677698	-0.173667	0.089357	0.1196	0.0903844	0.0835908	0.026207	0.110522	-0.223155	0.061211	-0.0205987	-0.0675936	-0.174916	0.0123959	0.298142	0.246441	0.0185489	0.136014	0.228266	-0.138523	0.0418196	-0.0490375	0.130575	-0.0179644	0.142336	0.2205	0.210004	0.104574	-0.0633519	0.0786419	-0.161876	0.148566	-0.0447064	-0.150061	0.0124479
TCGA.CF.A7I0.01	-0.891509	0.0822911	0.177638	0.0807304	0.0216713	0.178015	0.130677	-0.0126912	0.184054	-0.00457911	0.0640323	-0.0423042	0.0801478	0.118287	0.0818484	0.141108	-0.0222857	0.103661	0.0326982	0.0175204	-0.0465544	-0.03195	0.0170337	0.0177987	0.168212	0.0908259	0.0501706	0.0551004	0.0758373	-0.0298683	0.0284293	0.04968	-0.00472973	0.162453	0.115793	0.162034	0.117907	0.0558999	-0.0796601	0.0828191	-0.0161003	0.033115	-0.0136101	-0.202367	0.168003
TCGA.CF.A8HX.01	-1.32211	0.0912449	0.108294	0.0601772	-0.00526963	0.172189	0.162683	0.0203974	0.0890296	0.0586008	-0.00225859	-0.13803	0.081253	0.0693254	0.024159	0.0294275	-0.0126816	0.112276	-0.181782	-0.0560466	0.0473787	-0.038627	-0.17616	0.0715354	0.061973	0.109638	0.0968707	0.129757	0.169605	-0.139535	0.106886	-0.0224653	-0.00185944	0.0461716	0.0657855	0.172825	0.00888708	0.00245066	0.256256	0.0486253	-0.103082	0.0235968	-0.0469193	-0.215319	0.101443
TCGA.CF.A8HY.01	-0.618243	-0.0566408	0.0405682	0.160309	-0.0278463	0.23874	0.0791453	0.0700094	0.0836431	0.0580294	0.0573482	-0.0985957	0.0904394	0.0201461	0.13758	0.171604	0.0623078	0.183109	-0.187207	0.0130679	-0.085721	-0.058961	-0.162682	-0.0299313	0.333333	0.325623	0.0635399	0.067526	0.0959594	-0.231642	0.0216069	-0.00520051	0.121295	0.0497768	0.147924	0.0901583	0.224283	0.150075	0.0086433	0.0832357	-0.0761405	0.161751	-0.0513355	-0.140124	0.103963
TCGA.CF.A9FF.01	-0.502785	-0.0223316	0.117166	0.105673	-0.0253667	0.164249	0.157354	0.0613883	0.0790459	0.0376875	0.0283298	0.0473736	0.0555509	0.190983	0.0761507	0.158014	0.0943271	0.124092	-0.0257714	0.0920405	0.170773	-0.0159457	-0.0306456	0.0271532	0.112241	0.129797	0.0508753	0.0982645	0.172859	-0.00523524	0.0360659	0.06291	0.084854	0.126869	0.12303	0.0081021	0.137043	0.0360633	-0.0890077	0.0520703	0.113856	0.0768452	0.00404825	-0.286615	0.120058
TCGA.CF.A9FL.01	-0.842153	-0.0177347	0.0562615	0.164723	-0.0202705	0.105277	0.0623208	0.046374	0.0839731	-0.0295644	0.0658915	-0.0585642	0.122555	0.0338935	0.084949	0.112834	0.10312	0.150922	-0.120588	0.0364269	0.0623606	-0.027182	0.234933	0.116209	0.191321	0.112277	0.0636865	0.156341	0.15117	-0.291938	0.0215355	0.053247	0.102248	0.190123	0.117474	0.151998	0.119648	0.0158124	0.0147394	0.0538688	-0.0289829	0.118381	0.0597902	-0.238014	0.104408
TCGA.CF.A9FM.01	-0.880168	-0.0160135	0.0683357	0.121971	0.04711	0.165464	0.137617	0.0599723	0.179153	-0.000122286	0.0635671	-0.0452063	0.0444887	0.0222416	0.162439	0.219469	0.0738642	0.00217133	-0.0179314	0.302468	0.0812938	-0.0196319	-0.246173	0.151842	0.0768521	0.0711993	0.0620744	0.0251156	-0.155724	-0.128042	0.00639576	0.0340189	0.00125531	0.129668	0.13035	0.0642754	0.217598	0.0121703	0.132843	0.109803	-0.0901833	0.0951472	0.141212	-0.196112	-0.0625897
TCGA.CU.A0YN.01	-0.0985531	-0.0091481	-0.0575339	0.0553452	0.112524	0.030653	0.00324982	-0.00113178	0.0863779	0.0603497	0.189186	-0.0673527	0.0797929	0.0625826	0.136013	0.239876	0.211667	0.130085	0.24481	0.0362137	0.12015	0.116829	0.172978	0.191972	0.185908	0.158864	0.179295	0.310576	0.369434	-0.0399771	0.0543729	0.123943	0.281654	0.0888072	0.0110271	0.1899	0.033295	0.105436	-0.106534	0.00477675	0.168236	0.168182	0.0781394	-0.196849	-0.0751476
TCGA.CU.A0YO.01	-0.18443	0.0040252	0.0154196	0.120494	0.0638598	0.0775484	0.0491792	0.153652	0.203513	0.00828777	0.126691	-0.142624	0.182706	0.232982	0.232734	0.343367	0.132295	0.146822	0.125214	0.345498	0.326097	0.104523	0.0332817	0.0566498	0.145675	0.175795	0.111538	0.115193	0.00497455	-0.0078204	0.0628327	0.179235	0.0664996	0.251017	0.212359	0.127864	0.0559238	0.0578371	-0.0645425	0.102357	0.173059	0.134304	0.115343	-0.208282	0.134659
TCGA.CU.A0YR.01	-0.124079	-0.0268299	0.15516	0.0698985	0.00422122	0.180045	0.0597364	0.147159	0.025938	0.0506898	-0.0136371	-0.169152	0.0826154	0.174118	0.0706818	0.230098	0.154549	0.160362	0.243607	-0.0202759	0.226522	0.173872	0.176268	-0.0283781	0.287481	0.335141	0.109716	0.19649	0.383107	-0.168629	0.00170799	0.12454	0.180529	0.22058	0.128311	0.0340215	0.130123	0.0905992	0.011443	0.149874	0.217933	0.182225	0.124169	-0.219483	0.0119466
TCGA.CU.A3KJ.01	-0.0737748	-0.05407	-0.0850777	0.067024	0.0890796	0.135164	-0.0100403	0.0633818	0.0882943	0.112017	0.114631	-0.231974	0.142372	0.0184258	0.1401	0.304927	0.128142	0.075274	0.077368	0.108859	0.102263	0.0853449	0.0475333	0.127433	0.139481	0.185897	0.192961	0.250005	0.321555	-0.356732	0.0123901	0.0409054	0.168144	0.0603241	0.145368	0.0343073	0.062867	0.104508	0.0354637	0.036204	0.0218026	0.18436	0.237474	-0.0753735	-0.110993
TCGA.CU.A3QU.01	-0.315318	-0.0295053	0.123578	0.158668	0.0605535	0.132207	0.139635	0.167147	0.124188	0.1006	-0.000733155	-0.18594	-0.0118419	0.121558	0.0726899	0.231477	0.0593484	-0.0632804	-0.141087	0.134567	0.0295144	0.0485774	-0.201218	0.056491	0.167473	0.143737	0.133699	0.185788	0.349823	-0.203488	-0.051866	-0.0636099	0.185878	0.0999756	0.166558	0.0265245	0.15302	0.140264	-0.0913767	0.0955528	-0.109719	0.171197	0.181725	-0.119036	-0.0687457
TCGA.CU.A3YL.01	-0.991567	0.0377038	-0.0202749	0.07242	0.0226312	0.115222	0.103754	-0.0535072	0.152167	-0.0182197	0.0478052	-0.0700988	0.05576	0.132109	0.0425753	0.133534	0.0476548	0.0995272	-0.00281989	0.106978	0.07736	-0.0773513	-0.0900968	0.00570956	-0.0177401	0.0797577	0.115621	0.0749785	0.0883887	-0.00722854	0.0947997	0.0262636	-0.0704783	0.0956617	0.0791251	0.0156868	0.132036	0.108953	-0.129906	0.00554516	-0.0348046	0.00629357	-0.0750788	-0.145599	0.0939841
TCGA.CU.A5W6.01	-0.750622	0.0935567	0.089426	0.195153	0.040761	0.207981	0.149918	0.0779185	0.105839	0.0418868	0.0164126	-0.167566	0.0372912	0.0914998	0.0451415	0.167535	0.0219607	0.0603009	-0.060332	0.12169	0.109723	0.00167743	-0.162421	-0.00698616	0.147035	0.166316	0.028716	0.106637	0.208687	-0.237786	0.0384083	0.0298642	0.163561	0.105817	0.12039	0.0197158	0.216334	0.148181	-0.0808654	0.105337	-0.125905	0.159536	0.125952	-0.14197	-0.00287477
TCGA.CU.A72E.01	-0.125929	0.13108	0.0767075	0.151594	0.000579486	0.202437	0.198128	0.0010859	0.0712242	0.00122577	0.0244261	-0.0950165	0.109624	0.0998121	0.217258	0.0831785	0.0147741	-0.0486437	-0.056839	0.0222814	-0.0721155	0.0366264	0.14957	0.0210661	0.240628	0.267112	0.0570186	0.155102	0.20561	-0.146999	0.0520778	0.0726652	0.201163	0.131306	0.139495	-0.00937212	0.276766	0.108089	0.280631	0.135349	-0.0775482	0.118451	0.0401574	-0.218811	0.0662988
TCGA.DK.A1A3.01	-0.119932	0.00754018	-0.00687278	0.163998	0.0493669	0.167742	0.0243189	0.138324	0.131899	0.0642491	0.106351	-0.00400678	0.0745743	0.0928447	0.037753	0.113194	0.157175	0.152993	0.125104	0.0794239	0.261111	0.0572036	0.262525	0.136355	0.173514	0.125839	0.071534	0.125345	0.177538	-0.0655063	0.0211746	0.119077	0.206316	0.171391	0.151971	0.0254878	0.109668	0.151222	-0.0660241	0.170745	0.142036	0.214623	0.170717	-0.207085	0.00652665
TCGA.DK.A1A5.01	-0.271464	-0.0643335	0.00442072	0.147121	-0.0137534	0.108254	0.0134647	0.110372	0.0881422	-0.0186899	0.149322	-0.11561	0.141572	0.178224	0.154456	0.135216	0.0852478	0.139742	-0.00252567	0.188641	0.199032	0.0553893	0.325846	0.152361	0.202018	0.221697	0.141627	0.250586	0.325845	-0.172879	-0.0220906	0.113476	0.160574	0.137629	0.191057	0.138323	0.0295755	0.113982	-0.0880141	0.0694272	-0.00321195	0.176154	0.112192	-0.123063	0.136867
TCGA.DK.A1A6.01	-0.427782	-0.117113	-0.0461689	0.147972	0.00251158	0.228549	-0.0185256	0.152876	0.0564027	0.0132348	-0.0213681	-0.237116	-0.00685372	0.0555866	0.0875638	0.167445	0.0761612	0.0945922	-0.0336444	0.162321	0.267501	0.0827369	-0.113098	-0.021311	0.32952	0.289295	0.141161	0.301712	0.41322	-0.341708	-0.122484	-0.021942	0.247709	0.206737	0.108582	0.0219661	0.174517	0.146896	-0.184043	0.125647	0.23046	0.212012	0.150257	-0.234832	-0.0860659
TCGA.DK.A1A7.01	-0.360546	-0.0771841	0.0556047	-0.00126706	0.0185147	0.234765	0.135746	0.0330733	0.089448	0.0594799	-0.0490675	-0.1795	0.0492617	0.121062	0.0695113	0.0760811	0.112721	0.0229186	-0.0619483	-0.113492	0.00246341	-0.0826927	-0.119345	0.0220705	0.224336	0.223375	0.0216805	0.194462	0.188528	-0.0903916	0.104921	-0.00156423	0.119416	0.0387648	0.0983003	0.151601	0.0399142	0.0737177	-0.00814846	0.0356268	0.027958	0.116428	-0.00534356	-0.101608	0.0420678
TCGA.DK.A1AA.01	-0.310198	-0.0597725	0.0598325	0.157928	0.0749409	0.093872	0.0593111	0.125083	0.143949	0.000205566	0.100818	-0.211258	0.0942869	0.12847	0.182892	0.160064	0.0559897	0.16497	-0.168393	0.187715	0.0338601	-0.00937829	-0.0722201	0.204249	0.236658	0.318085	0.104669	0.10791	-0.00357072	-0.153307	0.0108501	0.0902923	0.121973	0.103634	0.164194	0.172544	0.127158	0.0884684	0.0152062	0.121708	-0.0244598	0.170806	0.188173	-0.264426	-0.0590858
TCGA.DK.A1AB.01	-0.136165	-0.0251141	0.0539596	0.0885049	0.0453334	0.0729231	0.0345971	0.0672912	0.0694634	-0.00867848	0.173507	-0.00573184	0.202871	0.127121	0.182126	0.128755	0.121689	0.156062	0.201427	0.37532	0.363928	0.183997	0.409105	0.14403	0.0456935	-0.0205778	0.0938753	0.16744	0.062988	0.0497941	0.152026	0.205954	0.0925091	0.195864	0.11232	0.0946433	0.123008	0.0825844	0.0492455	0.0523596	0.139756	0.0756454	0.0754028	-0.08201	0.148416
TCGA.DK.A1AC.01	-0.312595	-0.0449269	0.151672	0.00323293	-0.0680178	0.107556	-0.0113009	0.0632196	0.0465402	0.0836787	-0.0111127	-0.274189	-0.0522279	-0.158749	0.0632448	0.238684	0.158525	0.0130572	0.149733	-0.0802484	0.0972798	0.0857324	0.066909	0.0921815	0.314497	0.304978	0.111838	0.269036	0.40746	-0.0651931	-0.0406762	0.0220072	0.247761	0.102569	0.113539	0.0699652	-0.00825995	0.0986658	-0.155132	0.0963025	0.192851	0.268741	0.152749	0.00675267	-0.159525
TCGA.DK.A1AD.01	-0.257044	0.0459682	0.120644	0.154686	-0.0393147	0.122521	0.151159	0.068735	0.0863186	-0.00348986	-0.0451208	-0.237941	0.0445778	0.123822	0.046373	0.0240155	-0.00395775	0.01063	-0.105386	0.0198988	0.173873	0.0109603	0.044957	-0.0325511	0.288186	0.285137	0.0785711	0.183277	0.288155	-0.152906	0.0519556	0.0281816	0.185288	0.171056	0.11597	0.143714	0.0109755	0.0595796	-0.232743	0.0349967	0.00200758	0.18591	0.068275	-0.186705	0.0323963
TCGA.DK.A1AE.01	-0.200472	-0.0301872	0.130087	0.169301	-0.0352469	0.0539603	0.0537806	0.0992045	0.0318285	0.0302325	0.0249914	-0.377953	-0.00526477	0.140796	0.015406	0.0417657	0.0717147	-0.0771043	-0.192417	-0.0737698	-0.0206574	0.0500614	-0.0743663	0.178284	0.374245	0.446324	0.13667	0.391453	0.451159	-0.316789	0.0135709	0.0221659	0.264048	-0.0366064	0.130053	0.12488	0.125727	0.100956	-0.198684	0.0637098	0.00339631	0.23728	-0.0121533	-0.130841	-0.0485482
TCGA.DK.A1AF.01	-0.269338	0.00109454	-0.00252176	0.12908	0.0889166	0.0853394	0.0963964	0.159369	0.189346	-0.0358402	0.180469	0.383935	0.257631	0.250469	0.178513	0.422809	0.328663	0.342915	0.372127	0.247674	0.328345	0.234377	0.448458	0.132895	0.00600103	0.0471536	0.149209	0.100466	0.116898	0.135583	0.0541257	0.289012	0.0343479	0.236218	0.0702857	0.0107592	0.145751	0.102187	-0.0110398	0.0909246	0.308469	0.0853468	0.0253053	-0.168081	0.128393
TCGA.DK.A1AG.01	-0.565532	-0.112136	0.0114578	0.115153	0.0147171	0.151919	0.0909153	0.0355109	0.16993	0.00136063	0.0759576	-0.120359	0.0686722	0.0719588	0.167043	0.178418	0.0390383	0.00315934	-0.106226	0.111022	0.00458592	-0.0334837	-0.174729	0.0116138	0.165668	0.241638	0.0955443	0.0747001	0.0546229	-0.15364	0.0575444	0.0454554	0.047699	0.0321569	0.121369	0.109321	0.163138	0.088933	-0.0761986	0.0475514	-0.0170648	0.09049	-0.0238634	-0.312132	0.00146072
TCGA.DK.A2HX.01	-0.213599	0.068639	-0.0378064	0.14027	0.0948554	0.136182	0.0433198	0.054768	0.218458	-0.0705736	0.134455	0.143737	0.25957	0.259428	0.155033	0.166191	0.122749	0.277546	0.0558152	0.018241	0.152373	0.0743606	0.421062	0.140027	-0.0460654	-0.15153	0.146758	0.0654622	0.0437007	0.192286	0.00217998	0.187759	-0.065656	0.325183	0.10249	0.105193	0.162061	0.109324	-0.0379412	0.0924193	-0.0541454	0.0744311	0.187796	-0.163323	0.193877
TCGA.DK.A2I1.01	-0.33074	-0.0118218	0.146031	0.170369	-0.0371658	0.159389	0.0889738	0.0378546	0.0835105	0.0413695	0.0668235	0.0118002	0.147463	0.0750682	0.105017	0.104582	0.128173	0.143281	0.134485	0.00078878	0.175776	0.0960327	0.341529	0.116629	0.2436	0.153354	-0.0271766	0.0280135	0.15735	-0.256598	-0.0455291	0.139859	0.197315	0.174171	0.0586845	0.0731575	0.212656	0.0565063	-0.0353109	0.0961165	0.222813	0.173603	0.0454487	-0.239775	0.15212
TCGA.DK.A2I2.01	-0.0819632	-0.0150357	0.0081399	0.191746	-0.0271784	0.085057	0.0298505	0.0962962	-0.000953063	-0.0340114	0.058802	0.0794383	0.165857	0.0589886	0.157325	0.301	0.162001	0.0372374	0.310506	0.110214	0.135715	0.12968	0.293211	0.181864	0.288927	0.385851	0.0508667	0.145653	0.253174	0.0241618	-0.0200202	0.188323	0.298357	0.0927058	0.095917	0.00335561	0.119594	0.0921096	-0.025043	0.0761528	0.187746	0.131923	0.0552236	-0.0779263	0.00221266
TCGA.DK.A2I4.01	-0.221043	-0.0141761	-0.139736	0.0801433	0.0533534	-0.0413695	-0.0271354	0.108431	0.130866	-0.0224506	0.0557966	0.0916832	0.176122	0.0697729	0.125436	0.389965	0.285294	0.361645	0.403632	0.309154	0.433758	0.29656	0.380172	0.145802	0.069352	0.00453203	0.181674	0.182907	0.266945	0.0174569	-0.0361113	0.259011	0.0937729	0.102555	0.0819917	0.0489014	0.141849	0.157851	-0.107836	0.0677509	0.399169	0.0910516	0.0438602	-0.180515	0.0768089
TCGA.DK.A2I6.01	-0.14166	-0.0748175	0.0141746	0.164257	0.0473284	0.0789533	-0.0235047	0.0691103	0.0780582	0.0642902	0.143727	-0.225423	0.121214	0.0290857	0.109849	0.141789	0.057933	0.039353	-0.085041	-0.0949601	-0.0964868	-0.0907379	0.120617	0.225463	0.342103	0.429039	0.169299	0.26149	0.360129	-0.275101	-0.00350814	0.00690154	0.245299	0.00222703	0.114775	0.12158	0.131852	0.190114	-0.0513211	0.14295	-0.0481565	0.213931	-0.00396077	-0.185832	-0.00888248
TCGA.DK.A3IK.01	-0.366576	0.0983537	0.126016	0.0432639	-0.0153814	0.0709318	0.166944	-0.057934	0.091088	0.0224623	0.0336164	-0.173487	0.0862687	0.211551	0.0602056	0.0560825	0.0403715	-0.0148621	-0.118775	-0.0223021	-0.0190239	-0.0455976	0.171694	0.136899	0.0746395	0.135106	0.0134399	0.0138228	-0.0180745	-0.194981	0.0680311	0.0513685	0.0494211	0.0894914	0.0677796	0.161112	0.0582234	0.0395366	0.00743016	-0.00890273	-0.110172	0.060685	-0.0298222	-0.254203	0.148923
TCGA.DK.A3IL.01	-0.389124	-0.0631045	0.0221492	0.139287	-0.0293402	0.0954015	0.0615704	0.0301158	0.0602871	0.0273804	-0.0126623	-0.227727	0.0514719	0.151791	0.133673	0.0447818	-0.00476762	-0.00298966	-0.251853	-0.146727	0.0155455	-0.0276539	0.0789595	-0.000622041	0.173837	0.180136	0.116398	0.189015	0.257289	-0.117984	0.0744804	0.0223212	0.119457	0.183246	0.100751	-0.00468106	0.0504516	0.0468802	-0.107682	0.0155674	-0.105265	0.0945349	-0.0493392	-0.21846	0.132366
TCGA.DK.A3IM.01	-0.0900253	-0.126396	-0.0788588	0.083984	0.0611736	0.181779	-0.0261711	0.0153036	0.0652233	0.101512	0.0376225	-0.260412	0.109866	-0.0218103	0.11593	0.203611	0.0204721	-0.0716322	0.0192195	-0.123628	-0.202123	0.010017	0.0179801	0.104851	0.352547	0.410307	0.170197	0.355089	0.39868	-0.173509	0.0105148	-0.0036458	0.261563	0.0342963	0.123809	0.191	0.023066	0.0850948	-0.0517582	0.0017184	-0.0958961	0.179361	0.0409529	-0.0613529	-0.0688607
TCGA.DK.A3IN.01	-0.193883	-0.0206488	-0.00347898	0.163853	-0.00893626	-0.0329562	0.0127782	-0.00115767	0.0314173	0.0657765	0.112203	-0.0394807	0.136982	0.170641	0.132436	0.22298	0.136882	0.159231	0.212824	0.0226654	0.0742648	0.0880621	0.369227	0.178295	0.140448	0.286902	0.139131	0.221844	0.23871	0.00187725	0.0184415	0.167849	0.124555	0.213911	0.0546489	-0.0269563	0.0353281	0.0769148	0.0110986	0.0672665	0.1689	0.0675703	0.00434378	-0.221542	0.0299148
TCGA.DK.A3IQ.01	-0.241943	-0.0317929	-0.0227808	0.15407	-0.000632611	0.0014394	0.0043435	0.000254927	0.0954242	-0.043627	0.217957	0.203885	0.280463	0.164199	0.212078	0.191398	0.179247	0.23933	0.0964414	-0.0547776	-0.0302592	0.0444798	0.512462	0.172807	-0.098312	-0.146479	0.135939	-0.0452169	-0.170104	0.177147	0.0410717	0.135557	-0.0992969	0.205174	0.10178	0.192034	0.0447144	0.0711745	0.0133218	-0.0195477	-0.080876	0.0768827	0.014195	-0.187442	0.335247
TCGA.DK.A3IS.01	-0.309785	-0.0899268	0.070255	0.17463	-0.0196502	0.128974	0.0437604	0.0930913	0.0473337	0.0465226	-0.0471116	-0.127704	0.0424572	0.0012699	0.196244	0.061324	-0.00962752	0.0586115	-0.31863	0.191179	0.113275	-0.0546469	-0.184962	0.0914411	0.288744	0.320042	0.108278	0.284977	0.373916	-0.157327	0.0136813	-0.0134115	0.168023	0.0703509	0.15879	0.153624	0.156365	0.172303	-0.0753718	0.0613204	-0.0728774	0.232584	0.150598	-0.273901	-0.114016
TCGA.DK.A3IT.01	-0.265179	-0.0706167	0.0690375	0.166171	0.00726103	0.10059	0.0846893	0.0554291	0.113558	0.0256983	0.14871	-0.147637	0.154569	0.190469	0.0816194	0.0143793	0.0531429	0.0151982	0.00916197	-0.0666553	0.126522	0.075205	0.179837	-0.00115316	0.190867	0.239478	0.0909912	0.23573	0.348843	-0.226325	0.0206204	0.0517976	0.228624	0.159276	0.0804973	-0.16374	0.0683815	0.134221	-0.0698811	0.119632	0.0438103	0.13262	0.0166653	-0.312343	0.124171
TCGA.DK.A3IU.01	-0.176828	0.0540858	-0.00520372	0.0603617	0.00471163	-0.0595684	-0.0449953	0.0370033	0.094767	0.0172034	0.120317	0.0460428	0.216432	0.179346	0.154863	0.270439	0.237882	0.267097	0.248697	0.305478	0.451414	0.223788	0.361815	0.114968	0.105873	0.0507206	0.107497	0.158544	0.209121	0.152173	0.0899224	0.125165	0.067485	0.236425	0.106256	0.208077	0.241211	0.0481251	-0.0554214	0.00422311	0.386745	0.120191	0.0347258	-0.153928	0.205853
TCGA.DK.A3IV.01	-0.54894	-0.0954696	0.0752875	0.110517	0.047512	0.041089	0.0863815	0.0725477	0.103995	0.0393274	-0.0124736	-0.306842	0.0509695	0.194601	0.0871446	0.125571	0.150614	0.105703	0.097155	0.380057	0.285691	0.138172	-0.317516	-0.0292213	-0.0344396	0.0274727	0.123631	0.244348	0.29641	-0.104924	0.0707174	0.0325603	0.0520827	0.10168	0.0705567	0.000792056	-0.000356062	0.108268	-0.0788881	-0.0440277	0.233713	0.0684467	0.0813558	-0.229632	-0.122017
TCGA.DK.A3WW.01	-0.0973356	-0.11072	0.0418576	0.179095	0.0138006	0.0719146	-0.0077908	0.118235	-0.0196381	-0.00416394	0.0920975	-0.216189	0.147701	0.0175638	0.100866	0.279762	0.232248	0.16076	0.221439	0.421331	0.374364	0.137301	0.0717437	0.0503378	0.381756	0.372264	0.069064	0.288457	0.337053	-0.353373	-0.141081	0.059711	0.308585	-0.167982	0.114115	0.128651	0.191709	0.117291	-0.0370777	0.0984156	0.349398	0.199282	0.116952	-0.100892	-0.0873256
TCGA.DK.A3WX.01	-0.151691	-0.0787234	-0.0392872	0.110096	0.0279869	-0.0149954	0.0064781	0.0359049	0.112743	-0.00714703	0.0817649	-0.059728	0.164938	0.0947861	0.0461965	0.227456	0.178758	0.0925999	0.228205	0.0685552	0.332595	0.129027	0.309294	0.12224	0.218968	0.371161	0.178464	0.296913	0.353144	-0.147495	-0.0229144	0.118138	0.244529	0.0104392	0.133554	0.0636088	0.0195798	0.083646	0.028403	0.0768375	0.185587	0.153066	0.06054	-0.163127	-0.094091
TCGA.DK.A3WY.01	-0.360112	-0.065639	0.0528268	0.0487473	-0.0231189	0.0250992	-0.0456302	0.102969	-0.0124276	0.0544648	0.0701025	0.0658222	0.141696	0.0846902	0.0721363	0.182917	0.240076	0.144532	0.228271	0.165797	0.354517	0.238318	0.300434	0.0925943	0.262023	0.144203	0.10517	0.277946	0.38214	-0.14576	0.0335357	0.11563	0.104745	-0.0308185	0.109931	0.126093	0.181151	0.0591892	-0.12517	0.0104045	0.409219	0.124569	-0.126844	-0.0725809	0.164986
TCGA.DK.A3X1.01	-0.40361	-0.145719	0.0682643	0.142634	-0.00192894	0.206638	0.0331899	0.117265	-0.0171898	-0.0172343	-0.024205	-0.093493	0.0898245	0.0236753	0.0721803	0.193044	0.0752168	0.0223171	-0.0898916	0.0299197	-0.0182302	0.0167132	0.133503	0.0409623	0.19346	0.276851	0.0540289	0.189571	0.313213	-0.29135	-0.0364886	0.00349284	0.214618	0.104262	0.113044	0.180434	0.119535	0.11508	-0.0840518	0.0397088	-0.113985	0.136968	0.0645606	-0.132426	0.0134671
TCGA.DK.A3X2.01	-0.420737	-0.102305	-0.0183043	0.1639	0.026531	0.0990423	-0.0402228	0.00189808	0.107553	0.120713	-0.0129956	-0.376335	0.0074219	0.0245343	0.185647	0.0462736	-0.0128195	-0.0866039	-0.358735	0.0202417	0.065666	-0.0362399	-0.197415	0.138262	0.245279	0.311513	0.190086	0.390949	0.440552	-0.21712	0.0244451	-0.0167504	0.191695	-0.0384714	0.173871	0.0699837	0.102177	0.144556	-0.10799	0.106696	-0.107644	0.210299	0.0658557	-0.247802	-0.0197199
TCGA.DK.A6AV.01	-0.879359	0.0545222	-0.0323873	0.205845	-0.0192608	0.252235	0.0941074	0.0793251	0.160563	-0.0107629	0.0300522	0.0693338	0.0432783	0.151692	0.0762297	0.161892	0.116749	0.0649427	-0.150794	-0.255928	0.00656758	-0.0243423	-0.0732237	0.0667299	0.32671	0.351324	0.112333	0.257031	0.344772	-0.216214	0.0305411	0.067644	0.28083	0.16608	0.16977	0.0127755	0.162282	0.147916	0.117137	0.114835	0.0639186	0.229138	0.0588638	-0.198382	-0.0249867
TCGA.DK.A6AW.01	-0.982209	0.0895542	0.051909	0.0703891	0.0445515	0.0520903	0.193896	0.113843	0.0465002	0.0236671	0.160453	0.159465	0.105544	0.145174	0.0685312	0.231194	0.0901702	0.122697	-0.12856	0.0490908	-0.0966584	-0.12577	-0.0288388	0.107616	0.184462	0.18124	0.0610953	0.0281193	0.0388687	-0.155332	0.0433095	0.00168058	0.0331381	0.0308357	0.0452147	0.137957	0.263068	0.113248	0.163539	0.164113	-0.139954	0.0676931	0.0756755	-0.0951142	0.0465808
TCGA.DK.A6B0.01	-0.477857	-0.125307	0.078451	0.161062	0.0348392	0.152425	0.0728664	0.00713508	0.125152	-0.0226131	0.0181783	-0.187281	0.0378669	0.0608738	0.089306	0.152704	-0.0320987	0.0789999	-0.265507	0.183908	-0.0215612	-0.126927	-0.180377	0.0686401	0.261159	0.279369	0.045066	0.0109213	-0.070139	-0.153559	0.0110709	-0.0038567	0.0817556	0.0606232	0.121381	0.100979	0.212277	0.0546276	-0.0271158	0.0765685	-0.0733742	0.132848	0.0522301	-0.187275	-0.0418656
TCGA.DK.A6B1.01	-0.412372	0.104127	0.149285	0.103681	0.039414	0.209722	0.183652	0.171604	0.105683	0.0487544	0.0322443	0.0802507	0.00261776	0.0980174	0.0357126	0.237115	0.0897762	0.00255685	-0.0339946	0.25743	-0.0271444	-0.0578933	-0.108014	-0.0210352	0.237721	0.116858	0.0800168	0.208655	0.293731	-0.270647	-0.0506862	0.0174771	0.0977704	-0.0279411	0.17497	-0.116458	0.0663698	0.0669053	-0.0932647	0.0759	-0.0416098	0.136855	0.137048	-0.124933	-0.0691379
TCGA.DK.A6B2.01	-0.273003	-0.0988372	0.0789761	0.143081	0.0327608	0.0858612	0.043355	0.0755831	0.155606	-0.0233257	0.133645	-0.0840976	0.119421	0.253987	0.0252096	0.0998158	0.165714	0.128431	0.128173	0.202258	0.358131	0.148106	0.26938	0.0404576	0.120172	0.0887784	0.0643719	0.150086	0.176766	-3.87724e-05	-0.0223368	0.155229	0.0586374	0.27243	0.15287	0.108288	0.0607172	0.0925659	-0.0604472	0.0851512	0.268062	0.141617	0.0424137	-0.138257	0.0443218
TCGA.DK.A6B5.01	-0.790082	-0.0164915	-0.0157911	0.168019	0.0387683	0.146022	0.144476	0.0327863	0.163844	0.0190789	0.0200356	-0.236419	0.151972	0.174945	0.100707	0.18443	0.0202677	0.0278496	0.0487382	0.194387	0.232029	0.064933	0.0256632	0.0180125	-0.0169411	0.0466642	0.0960796	0.104697	0.212328	-0.251383	0.136275	0.00491042	0.0850668	0.0656595	0.10053	0.157643	0.138256	0.0376188	0.059429	0.119673	0.0332345	0.0386219	0.0188722	-0.26725	0.0112204
TCGA.DK.A6B6.01	-1.08274	-0.0994934	0.143193	0.0971539	0.0362831	0.184579	0.186909	0.108565	0.151173	0.0244255	0.0348805	-0.258961	-0.0480346	0.105483	0.135374	-0.0369735	0.0951987	-0.0262659	-0.0124748	0.309935	0.389334	0.01357	-0.307302	-0.00265066	0.0990498	0.108551	0.0644756	0.138308	0.142955	-0.105636	-0.0228898	0.021148	0.146201	0.112702	0.175675	0.0572115	0.0874388	0.0428465	-0.131474	0.086899	0.210436	0.127196	0.105213	-0.253186	-0.085905
TCGA.DK.AA6L.01	-0.840241	-0.186701	0.0345366	0.130065	0.0392557	0.10787	0.119895	-0.0275279	0.131502	0.0215886	0.0520979	-0.0838494	0.075905	0.0653547	0.100903	0.208206	0.00261157	0.0831979	0.0262824	0.289335	0.110762	0.0350794	-0.000227971	-0.0121555	0.179743	0.214045	0.079935	0.151948	0.231341	-0.378256	0.092278	0.0213604	0.118585	0.120379	0.104981	0.0756682	0.10065	0.0965611	0.0211297	0.0541869	0.0432209	0.113998	-0.00694054	-0.205129	0.0738728
TCGA.DK.AA6M.01	-0.242923	-0.0933341	-0.0296117	0.0693995	-0.00561118	0.12162	0.0550274	0.0215615	0.0640101	0.0092126	0.120724	0.0130898	0.168465	0.160077	0.245546	0.227795	0.182977	0.0722285	0.16094	0.238872	0.285219	0.0493962	0.265953	0.138989	0.275617	0.262426	0.0936212	0.169737	0.300302	-0.175249	0.00663338	0.0673391	0.186611	0.0485585	0.11567	0.191809	0.213425	0.160528	0.176817	0.0439985	0.194053	0.126218	-0.0623767	-0.236151	0.0496002
TCGA.DK.AA6P.01	-1.20288	-0.0889457	0.138044	0.0737444	0.0203075	0.143523	0.108755	0.101551	0.150575	0.0453737	0.056353	-0.212934	0.0413558	0.0296226	0.0754511	0.0473297	-0.00487316	0.0937032	-0.228995	-0.0933832	-0.0618126	-0.0251902	-0.242515	0.0884616	0.160606	0.201908	0.150965	0.208118	0.192624	0.0953653	0.0261623	-0.0237483	0.0886878	0.0841309	0.129811	0.243122	0.0451183	0.118599	-0.0118255	0.0263661	-0.205849	0.126308	0.0673948	-0.145601	-0.0738084
TCGA.DK.AA6Q.01	-0.163477	-0.027756	-0.0272229	0.119901	0.0173136	0.0884364	0.0320469	0.00500739	0.0875843	-0.0079908	0.098195	-0.370699	0.119899	0.16022	0.100964	0.173126	0.0845082	-0.00618428	-0.0755757	0.179982	0.24466	0.0387105	-0.101367	0.00344621	0.231073	0.297763	0.0897937	0.255023	0.333656	-0.0176035	0.0252684	0.0283688	0.214179	-0.0337317	0.115176	0.162779	0.222643	0.182254	-0.0506407	0.0927087	0.176778	0.129174	-0.0521152	-0.120434	-0.030083
TCGA.DK.AA6R.01	-0.0654446	-0.0858136	-0.0369021	0.14416	0.0741824	0.0870493	-0.0128405	0.0305684	0.0524576	0.0358681	0.129651	-0.225334	0.170505	0.0743514	0.226937	0.152752	0.127052	0.064841	-0.030391	0.18776	0.229072	0.0374835	0.152614	0.0806919	0.241375	0.316426	0.198561	0.285999	0.371467	-0.247113	0.0271512	0.061207	0.232122	-0.0507527	0.131493	0.0643344	0.156995	0.103025	0.0237425	0.0512825	-0.048353	0.116706	0.111317	-0.279689	0.00367979
TCGA.DK.AA6S.01	-0.421891	-0.109299	-0.0710611	0.110765	0.00591852	0.0861382	0.000665789	0.0330575	0.0858488	-0.0157746	0.142283	-0.145186	0.201237	0.112008	0.0967545	0.237489	0.186824	0.172383	0.176372	0.246747	0.283989	0.0710551	0.378909	0.185556	0.0916945	0.150202	0.106619	0.121466	0.108841	0.19675	0.0340617	0.13345	0.0922434	0.145854	0.0868299	0.178463	-0.0577692	0.0779106	0.00914345	-0.0566332	0.209147	0.0752273	0.00381739	-0.00157871	0.127696
TCGA.DK.AA6T.01	-0.478802	-0.0479277	0.0509307	-0.0418198	0.0175429	0.138536	-0.0624947	0.0813866	-0.00536228	0.0478708	-0.145075	-0.266415	-0.023874	-0.0238629	0.0432202	0.160393	0.125376	0.0951854	0.0176699	-0.0941384	0.142343	0.0816253	-0.117878	0.0179976	0.361821	0.294218	0.0694016	0.294812	0.449078	0.0619048	-0.021631	0.0134977	0.227404	-0.0696814	0.120211	0.0498094	0.121519	-0.000372748	-0.184837	0.0266769	0.272247	0.161238	-0.117615	-0.101947	0.0386129
TCGA.DK.AA6U.01	-0.455337	-0.0232348	0.0580858	0.105165	-0.0287584	0.181011	0.165921	0.0819238	0.197209	0.0312885	0.00358012	-0.151032	-0.00129271	0.122081	0.0579434	0.0671437	0.0533267	0.0114668	-0.157997	0.0824702	0.15783	-0.00694333	-0.0840757	-0.0400329	0.194589	0.275193	0.169398	0.223204	0.367072	-0.18897	0.0487987	0.0127551	0.205171	0.139059	0.0751056	0.130094	0.210092	0.0337106	-0.135094	0.00237417	-0.158997	0.172941	0.0227336	-0.189379	-0.0492414
TCGA.DK.AA6W.01	-0.320607	0.000330828	-0.0678277	0.115678	0.0122867	0.158008	-0.0187574	-0.0498171	0.0480257	0.0896507	-0.0314954	-0.164042	0.0763899	0.0476323	-0.0601503	-0.183216	0.00306451	-0.131408	-0.0462877	-0.13816	-0.152158	-0.0513574	-0.0184282	0.0433924	0.182987	0.206179	0.101497	0.34671	0.388	0.320656	0.173111	0.056494	0.171627	0.0252619	0.0277647	0.192765	-0.172175	0.101236	-0.160141	-0.0685784	-0.0650089	0.121023	-0.120989	0.148491	-0.00176854
TCGA.DK.AA6X.01	-0.678404	-0.000275871	0.0905189	0.110749	0.0699535	0.208807	0.121318	0.148765	0.136548	0.0248099	0.0449283	-0.069224	0.0257519	0.146992	0.109904	-0.0504546	0.0430527	0.174787	0.131886	0.190071	0.317163	0.083995	-0.104019	-0.0506408	-0.0391579	-0.113998	0.0424112	0.152845	0.236499	0.0663816	0.104635	0.118141	0.0753255	-0.0761689	0.0939439	-0.0316251	0.103331	-0.0515313	0.040783	0.0345289	0.11005	0.0127833	0.0782179	-0.00986082	0.0702313
TCGA.DK.AA71.01	-0.231738	-0.0849588	0.0758146	0.211989	-0.00312393	0.0955737	0.115311	0.0575861	0.128638	-0.0205208	0.0435621	-0.246776	0.061811	0.0765302	0.123633	0.0550785	-0.0158835	-0.102955	-0.222852	0.0466363	0.10046	-0.0209395	-0.0877604	-0.0450146	0.327157	0.215383	0.0863686	0.198358	0.213084	-0.185469	0.0482726	0.0321528	0.187975	0.156153	0.168109	0.0525665	0.206759	0.134177	-0.149364	0.0436328	-0.063884	0.191436	0.0653753	-0.101181	0.0242884
TCGA.DK.AA74.01	-0.111097	0.0961451	0.0899162	0.153158	0.0133165	0.0957936	0.0631824	-0.0177348	0.00606706	0.00741175	0.18004	0.329249	0.235369	0.151505	0.141225	0.282401	0.192557	0.279243	0.257865	0.255298	0.303481	0.141951	0.423869	0.018471	0.190194	0.185801	-0.0301215	0.00860161	0.122726	-0.0266241	0.084668	0.175891	0.125317	0.185998	0.043422	0.0628661	0.284611	0.123341	0.0891545	0.097291	0.320505	0.08025	-0.0958642	-0.239408	0.219795
TCGA.DK.AA75.01	-0.377525	-0.0363299	0.169228	0.0951572	-0.0252495	0.177338	0.0899834	0.018578	0.0599017	0.0787684	-0.098453	-0.110348	0.02325	0.110298	-0.0138733	0.00717074	-0.0397027	-0.076051	-0.188415	-0.0847677	-0.0909797	-0.0424156	-0.163101	-0.0377986	0.316488	0.33077	0.0922254	0.162111	0.2889	-0.158839	0.0766734	-0.0949462	0.227962	0.120701	0.0808799	0.0584676	0.0965885	0.0571182	-0.130375	0.0359407	-0.160484	0.176553	-0.0459701	-0.09517	0.0455924
TCGA.DK.AA76.01	-0.830295	-0.0373457	0.0957807	0.0561453	0.0207225	0.0726381	0.104139	0.0598166	0.085055	0.024796	-0.0492814	-0.0800174	-0.036322	0.0480028	0.123127	0.0561651	0.00599541	0.0462956	-0.194775	0.203105	0.00309024	-0.0567055	-0.297026	0.0292104	0.171721	0.135008	0.142252	0.251975	0.243037	-0.0658608	0.0125695	0.045533	0.0851158	0.076992	0.18022	-0.0073156	0.0773594	0.0619828	-0.145678	0.0464452	-0.169406	0.178032	0.0667715	-0.204181	-0.135167
TCGA.DK.AA77.01	-0.483761	-0.101414	0.0380501	0.21295	-0.00491645	0.142	0.143435	0.0710402	0.118665	-0.00485896	0.08278	-0.186	0.0549888	0.0495442	0.113466	0.137172	0.0193467	0.115125	-0.223395	0.267995	0.249625	-0.0288766	-0.165502	0.0143914	0.285518	0.289202	0.0830098	0.236836	0.33397	-0.179759	0.0697575	0.0204418	0.219952	0.0395376	0.130455	0.00189538	0.0877258	0.127111	-0.0959987	0.128518	0.112166	0.235308	0.130866	-0.312836	-0.0311664
TCGA.E5.A2PC.01	-0.170146	0.0104496	0.0569965	0.219234	0.0272885	0.131588	0.0766387	0.102001	0.161507	0.0181748	0.0336478	-0.264196	0.0899704	0.00116391	0.131423	0.162828	0.0745619	-0.0480212	-0.170401	0.270726	0.185066	0.0330138	-0.223832	0.0425406	0.282627	0.316026	0.0975226	0.252943	0.313066	-0.364982	-0.0270804	0.0338412	0.220951	0.14943	0.148075	0.0446815	0.23398	0.137737	-0.0265769	0.135192	0.0171856	0.152311	0.124094	-0.262755	-0.0827744
TCGA.E5.A4TZ.01	-0.339458	-0.0772091	-0.02923	0.0634614	0.0262051	0.0450592	0.00502733	0.0145861	0.164882	0.115126	0.0924571	-0.369921	0.0350793	0.132304	0.0386264	0.045684	-0.0456731	-0.129766	-0.123776	0.0246772	-0.0145532	0.0264359	-0.360385	0.00441278	0.174722	0.159262	0.18181	0.312452	0.372549	-0.30601	0.0611828	0.0348033	0.177358	0.0606935	0.147728	0.0390958	0.0366534	0.0955075	0.00611767	-0.00856331	-0.13806	0.11606	0.0212715	-0.21634	-0.0972655
TCGA.E5.A4U1.01	-2.41578	-0.032265	0.0848595	0.0410914	-0.0156707	0.201039	0.187471	0.0289168	0.137769	0.0865255	0.022852	0.0265453	-0.0171713	0.134585	0.0647626	-0.00915734	-0.0736182	0.0563069	-0.18379	-0.0834718	-0.142701	-0.0778485	-0.248086	-0.087378	0.128073	0.236154	0.0133215	0.0992444	0.181263	-0.0826094	0.103764	-0.0891783	0.0339951	-0.0554352	0.0716559	0.0246663	0.0815381	0.0681387	-0.052004	0.0372757	-0.148825	0.0943954	-0.0680986	0.0163733	0.00260894
TCGA.E7.A3X6.01	-0.150356	-0.155341	0.00128825	0.152167	0.0398981	0.125652	0.01398	0.0362919	0.100895	-0.00430365	0.0168815	-0.165904	0.0794121	0.117253	0.217442	0.101112	0.0917517	0.0580242	-0.0184897	0.367579	0.388221	0.0714566	0.0549306	0.129282	0.19138	0.304639	0.142681	0.21204	0.283948	-0.225678	0.00340564	0.073547	0.119261	0.0685382	0.105463	0.0600921	0.207049	0.109358	-0.0728739	0.0240588	0.196191	0.196022	0.119559	-0.29434	-0.0596464
TCGA.E7.A3Y1.01	-1.65775	-0.0591567	0.0746926	0.0815491	-0.0114187	0.0620439	0.0827228	-0.0417692	0.0398102	0.00327038	0.0130251	-0.127607	0.0652043	0.0161185	0.029809	0.0286003	-0.0565067	0.142827	-0.224968	0.0436955	-0.0210166	-0.103539	-0.201102	0.0210759	0.129328	0.20476	0.0366369	0.0681723	-0.00632259	-0.0698618	0.0291259	0.0269398	0.0275234	0.0362619	0.0748586	0.0612079	0.158056	0.0531427	-0.0388976	0.0389649	-0.0630359	0.0573609	-0.0337792	-0.281901	0.00428985
TCGA.E7.A4IJ.01	-0.483386	-0.155549	0.129655	0.183844	0.00268263	0.0441588	0.125217	0.0959102	0.0768036	0.0134723	-0.017848	-0.253393	0.042813	0.0684484	0.140661	0.0976556	0.0542655	0.056536	-0.0902671	0.231661	0.166631	-0.0276168	-0.20561	-0.0535079	0.162323	0.198524	0.0705997	0.141048	0.228159	-0.120356	-0.0263452	0.0175746	0.21201	0.0945625	0.112372	0.13395	0.152662	0.0968203	-0.0869662	0.0397739	0.0899474	0.150198	0.0945408	-0.141172	0.00437777
TCGA.E7.A4XJ.01	-1.20178	0.0106869	0.114526	0.146656	0.0169819	0.229528	0.137593	-0.0112713	0.0797754	0.0236056	0.0704502	-0.352785	0.0874183	0.173102	0.0518004	0.0889417	-0.00375017	-0.0548516	-0.114861	0.0337971	-0.086302	-0.0644226	-0.0825839	0.104288	0.187668	0.292202	0.0568488	0.0760516	0.0803583	-0.158106	0.0656368	-0.0471127	0.133259	0.119338	0.078561	0.100517	0.0200688	0.0637397	-0.0577732	0.0599423	-0.0826027	0.088822	-0.0960088	-0.165488	0.0729051
TCGA.E7.A519.01	-1.23231	-0.0342681	0.150009	0.101727	0.0381942	0.0695108	0.128397	-0.0496282	0.119785	-0.00885566	0.0399249	-0.0477705	0.105605	0.159622	0.127569	0.19308	0.119134	0.200362	0.00169076	0.257576	0.187467	-0.0265207	-0.094042	-0.0181962	0.126333	0.16346	0.012499	-0.107789	-0.112348	-0.0845028	0.0417314	-0.0187873	-0.0363323	0.0460732	0.0508541	0.152833	0.227989	0.0789418	0.0447799	0.0859594	0.16695	0.0755958	-0.14211	-0.225622	0.166193
TCGA.E7.A541.01	-0.48975	0.0102035	-0.0203662	0.090072	-0.00973821	0.163745	0.125418	0.0864409	0.146836	-0.00403687	-0.00335772	-0.229459	0.129149	0.138244	0.144482	0.121815	0.102986	0.0386464	-0.0457656	0.344862	0.304747	0.0292433	-0.122969	-0.0158277	0.177924	0.141685	0.140131	0.21849	0.381164	-0.0359649	-0.0181472	0.0256186	0.169657	0.102894	0.12542	0.147789	0.128635	0.110792	-0.0693841	0.0799017	0.217806	0.119251	-0.0433298	-0.272054	0.0287899
TCGA.E7.A5KE.01	-1.14389	-0.0534358	0.0226485	0.0771523	0.0244353	0.0993553	0.0356357	0.0603926	0.0952912	0.0797356	0.019298	-0.128345	0.0301371	0.0950476	0.00151675	-0.022528	-0.050116	-0.0519722	-0.221456	-0.181699	-0.170816	-0.00333582	-0.29137	0.0239756	0.17691	0.173646	0.101	0.274839	0.328382	-0.131971	0.0145094	-0.0620725	0.0929852	0.14949	0.122254	0.0894794	-0.0262569	0.0591952	-0.0578034	0.0395665	-0.10487	0.130915	0.0446659	-0.139398	-0.0570447
TCGA.E7.A5KF.01	-0.718512	-0.130421	0.0450476	0.16862	0.0259879	0.0826639	0.0878961	0.0678397	0.143757	-0.00956643	0.115033	-0.277191	0.0222414	0.174866	0.189423	0.169761	-0.0937839	0.0538952	-0.287499	0.200445	0.13836	-0.0570104	-0.273158	0.045156	0.169175	0.147246	0.104477	0.2028	0.164752	-0.107826	-0.00816834	0.00247498	0.0583532	0.161123	0.0900446	0.150234	0.127837	0.0349527	-0.120895	0.0387691	-0.14121	0.101406	0.0756743	-0.191529	-0.0991857
TCGA.E7.A677.01	-0.637384	0.0559258	0.0719602	0.115326	0.0554735	0.0543751	0.122372	0.10004	0.117326	0.0246837	0.14213	-0.0642833	0.0677285	0.181102	0.0470346	0.30509	0.100057	0.0796633	-0.0255715	0.211813	-0.0193606	-0.0109531	-0.0303191	0.130099	0.0189296	0.0556135	0.123407	0.162033	0.190045	0.107536	0.039506	0.0672337	0.0261475	0.107689	0.106243	0.27121	0.052711	0.0521563	-0.0342292	0.0453729	-0.0649681	0.0784795	0.0159152	-0.251474	0.0422452
TCGA.E7.A678.01	-1.05422	-0.0226866	0.131345	0.186005	0.0353799	0.0705337	0.123689	0.0272363	0.0748796	0.0173308	0.0267186	-0.24935	0.0368514	-0.0824849	0.143479	0.0618639	0.00241507	0.116722	-0.228261	0.202097	0.0917939	-0.0651946	-0.271626	0.0547387	0.267014	0.238306	0.0345818	-0.0484143	-0.10498	-0.0803447	-0.0519866	-0.0899249	0.0604132	0.105177	0.133116	0.149841	0.230604	0.0651883	-0.103489	0.107705	-0.0237048	0.131267	0.0619828	-0.237162	-0.054956
TCGA.E7.A6MD.01	-0.4877	-0.0637992	0.00510943	0.127935	-0.0477682	0.0160014	0.0781598	-0.00199711	0.14201	0.0228072	0.0541956	-0.0627673	0.13929	0.0652245	0.225017	0.195143	0.119015	0.161983	0.023496	0.0509163	0.151031	0.106145	0.18168	-0.0427761	0.0754981	0.130744	0.102501	0.139024	0.125174	-0.0695116	0.0581384	0.129759	0.10273	0.0985333	0.13467	0.205709	0.136156	0.0925446	-0.0361041	0.0571261	0.206697	0.147669	0.023045	-0.254522	0.0394385
TCGA.E7.A6ME.01	-0.369026	-0.0600395	0.0912626	0.0367731	-0.0299764	0.147751	0.106475	0.0363507	0.0763561	0.0900314	0.0410315	-0.165816	0.037762	0.177085	0.0310573	0.0542664	0.0491711	-0.032206	-0.0594311	0.172503	0.201814	0.044855	-0.140538	-0.149227	0.0957709	0.0467456	0.0449108	0.210143	0.274298	-0.0487569	0.13965	0.0619917	0.145847	0.0300422	0.048197	-0.012217	0.0309483	0.1316	-0.258677	-0.0661757	0.0702241	0.0623144	-0.0455994	0.408622	0.0125852
TCGA.E7.A6MF.01	-0.668195	-0.0331564	0.0886798	-0.0140122	0.0895015	0.000329678	0.031482	0.165458	0.195991	0.0413037	0.0265688	-0.124502	0.0511567	0.259113	0.109093	0.0149799	0.0193598	-0.120014	-0.0675147	0.120976	-0.0678467	0.00449529	-0.284283	0.160618	0.00518662	0.00721271	0.149372	0.0881979	-0.1152	-0.116197	0.0721174	0.12808	-0.133745	0.0952055	0.170988	0.210394	0.0227686	-0.0915508	-0.0310408	0.0636027	-0.16902	0.0624117	0.0587036	0.0275101	-0.0884926
TCGA.E7.A7DU.01	-1.13894	-0.0434869	0.0191113	0.156271	-0.0237261	0.128785	0.114633	0.110314	0.123944	0.0198661	-0.0128056	-0.153674	0.0845876	0.0679203	0.175914	0.103706	-0.00583696	0.0993104	-0.250405	0.151622	0.0549107	-0.117521	-0.185556	0.0444695	0.226368	0.242438	0.0780184	0.0932584	0.16335	-0.0925625	0.0146773	-0.0454963	0.113632	0.135025	0.117533	0.0878577	0.204193	0.0617565	0.0332964	0.0602301	-0.0530191	0.128167	-0.00550424	-0.299917	-0.00318434
TCGA.E7.A7DV.01	-0.193826	-0.0391048	0.00291353	0.17449	0.0282723	0.0994694	0.076613	0.0680332	0.097702	0.0467001	0.0680168	0.0472968	0.101094	0.125211	0.197021	0.16382	0.120992	0.286627	0.195656	0.29482	0.294712	0.179518	0.307255	0.0941714	0.209797	0.19599	0.0357952	0.120358	0.299274	-0.144005	-0.0837263	0.132968	0.286732	0.110602	0.102499	0.0573975	0.300738	0.147978	0.030802	0.151208	0.235557	0.165578	0.0703945	-0.266482	0.0489866
TCGA.E7.A7PW.01	-1.21822	-0.0367064	0.135114	0.110314	-0.0460025	0.156008	0.167442	-0.0217404	0.0682049	0.117967	0.0159215	-0.251948	0.0158752	0.111308	0.0972576	0.0039329	-0.0339626	0.00698156	-0.214343	-0.0742923	-0.00605779	-0.0393884	-0.255792	-0.130248	0.13717	0.00714228	0.0341462	0.109984	0.239813	-0.06161	0.10869	-0.102705	0.0814935	-0.0318929	0.0193549	0.0272273	0.0827615	0.0781701	-0.0899455	-0.0266578	-0.184353	0.0303033	-0.133808	0.0363211	-0.000430405
TCGA.E7.A7XN.01	-0.137029	-0.178023	0.0197092	0.164362	0.0220408	0.151438	0.0464773	0.113378	0.0465988	0.00860501	0.043622	-0.225032	0.15085	0.10029	0.188832	0.182509	0.146348	0.149016	0.182278	0.501607	0.453074	0.118007	-0.156958	0.0324118	0.255605	0.299052	0.104816	0.294772	0.307034	-0.382172	-0.0571784	0.104299	0.219648	-0.0507167	0.203603	-0.0852397	0.163058	0.0825326	-0.0469509	0.0725522	0.300641	0.179819	0.0415059	-0.339984	-0.101075
TCGA.E7.A85H.01	-0.76076	-0.0838353	0.0997153	0.129141	-0.00790533	0.182012	0.0948919	0.0168956	0.0268223	0.052775	-0.00500766	-0.199443	0.017326	-0.0205378	0.105992	-0.0294598	0.0462141	-0.0723859	-0.0981775	0.00869545	0.114384	-0.0133674	0.0187238	-0.0630458	0.261073	0.309893	0.0852436	0.227304	0.356221	-0.19484	0.0242736	-0.0271891	0.241896	0.147507	0.102423	0.136245	0.0955552	0.0850128	-0.150018	0.0531187	0.0876644	0.255717	0.0587662	-0.131157	0.0668452
TCGA.E7.A8O7.01	-0.827717	-0.02084	0.100143	0.122274	0.0295551	0.107606	0.100458	0.156417	0.214443	-0.0220077	0.0869058	-0.326606	0.0597143	0.117536	0.173373	0.236569	0.0797893	0.079485	0.0575627	0.308871	0.211243	0.0683322	-0.194662	0.158003	0.0588067	0.0483007	0.137028	0.0305196	-0.133841	-0.152168	-0.0215005	0.130141	0.0148027	0.206279	0.140178	0.052605	0.138575	0.0373461	-0.0214596	0.0717486	-0.0116847	0.0795073	0.136442	-0.226045	-0.0835559
TCGA.E7.A8O8.01	-0.828491	-0.143405	0.127205	0.10907	-0.0167906	0.140499	0.121157	0.0341906	0.0503688	0.0682245	0.0262057	-0.386853	0.068006	0.140343	0.0997685	0.0130961	0.010468	0.0383997	-0.29885	-0.0479213	-0.0237709	-0.0766419	-0.17463	0.105289	0.284572	0.279253	0.0658387	0.115932	0.24357	-0.181849	0.0275662	-0.00442528	0.130235	0.0653967	0.115494	0.133233	0.135597	0.0917495	-0.0998352	0.0533498	-0.111581	0.12212	-0.00937387	-0.229217	0.0164379
TCGA.E7.A97P.01	-0.194694	-0.0141174	0.0393882	0.153649	0.00616732	0.148204	0.0351315	0.113191	0.067843	-0.0236873	0.091299	0.0197757	0.216554	0.252464	0.114224	0.273847	0.226626	0.218959	0.260538	0.445831	0.411464	0.144448	0.249068	0.0956707	0.236135	0.23289	0.118935	0.235765	0.317402	-0.220444	0.0418228	0.155545	0.268154	0.0757097	0.142173	0.0796316	0.211511	0.0841519	0.176914	0.0568834	0.293258	0.136123	0.0975684	-0.167026	0.0887545
TCGA.E7.A97Q.01	-2.33876	0.0345546	-0.00226453	0.0755984	-0.0365138	0.151764	0.0711721	0.0240695	0.0551128	0.0442811	0.045428	-0.0542932	0.100965	0.0258969	0.0367162	0.127809	0.017887	-0.00667525	-0.0229048	-0.0454671	0.136026	-0.0571804	0.177592	0.115433	-0.0728153	-0.0936015	0.0853778	0.0367763	0.163253	-0.0630628	0.09042	0.0154928	-0.00637871	0.100998	0.044801	0.127122	0.0727993	0.0384194	-0.113921	0.0727486	-0.0607169	0.0675476	0.0892325	-0.249935	0.168725
TCGA.FD.A3B3.01	-0.156471	-0.0605463	0.0208051	0.0130215	0.0033872	-0.0296758	-0.0367455	0.0518238	0.0280467	0.00926255	0.101534	0.0307753	0.164459	0.12125	0.109177	0.425158	0.221942	0.155786	0.358705	0.382034	0.391698	0.213388	0.323563	0.0973852	0.263922	0.365984	0.144222	0.345326	0.370122	-0.141645	0.0166469	0.138202	0.209436	0.10661	0.0545639	0.0913874	0.0426101	0.121213	-0.0628831	0.0378608	0.364249	0.199312	-0.028371	-0.160828	0.0230199
TCGA.FD.A3B4.01	-0.150988	-0.107322	-0.105029	0.101413	0.0399681	0.117465	-0.0489618	0.0770411	0.0153784	-0.0737565	0.152988	-0.104976	0.218718	0.20252	0.203128	0.233114	0.162984	0.137757	0.140296	0.416313	0.414293	0.15249	0.373604	0.163531	0.194624	0.215167	0.111128	0.232539	0.353079	-0.0182902	0.0334681	0.0818441	0.191162	0.0130185	0.090608	0.136517	0.0415735	0.0348234	-0.00776875	0.00757255	0.288151	0.0775167	0.0266578	-0.10601	0.137701
TCGA.FD.A3B5.01	-0.107282	-0.0131422	-0.0599775	0.192566	0.045383	0.0914674	0.0247603	0.0258349	0.122814	0.0473536	0.131638	-0.32191	0.187553	0.215025	0.176783	0.150333	0.0965306	0.126619	0.0612552	0.137297	0.0638219	0.0707044	0.221428	-0.0171044	0.159633	0.20126	0.151569	0.193565	0.196267	-0.176923	0.0376925	0.027921	0.166316	0.0827081	0.126394	0.0455034	0.0414701	0.0592016	0.0557864	0.0529845	-0.0545887	0.131094	0.0607063	-0.304135	-0.0350053
TCGA.FD.A3B6.01	-0.162298	-0.147638	-0.016523	0.156634	-0.0241299	0.0478063	0.000998997	0.048234	0.108391	0.0136431	0.107117	-0.0907426	0.0603011	0.0582237	0.08797	0.149357	0.171101	-0.00264691	0.163985	0.172401	0.364233	0.105316	0.11427	0.0324253	0.262029	0.400451	0.115667	0.257949	0.35846	-0.252327	0.00876908	0.138574	0.293129	-0.00343048	0.0671594	-0.0146432	0.159968	0.121836	-0.100554	0.0143872	0.304564	0.157148	0.0519726	-0.218479	-0.0349053
TCGA.FD.A3B7.01	-0.103033	-0.0710423	-0.0616861	0.145267	0.0193604	-0.0433773	-0.0359272	0.0268801	0.0764849	0.0213575	0.120195	0.300156	0.283519	0.172377	0.177157	0.25189	0.263297	0.286014	0.360642	0.191721	0.353351	0.269336	0.463395	0.0828368	0.154753	0.273798	0.140738	0.213551	0.286599	0.0179691	-0.0383904	0.223159	0.226792	0.13147	0.0446624	0.146836	0.132416	0.136461	-0.103161	-0.0278721	0.384806	0.100456	-0.00517125	-0.110767	0.00822595
TCGA.FD.A3B8.01	-0.122069	-0.0417295	-0.0317797	0.0322776	0.0465419	-0.00374337	-0.037511	0.16088	0.00304336	0.0190334	0.170635	0.23457	0.240634	0.189899	0.233202	0.391498	0.303775	0.339905	0.440038	0.335088	0.45721	0.289484	0.45122	0.13651	-0.0112399	0.0716761	0.162902	0.172912	0.187556	-0.0611408	0.0437098	0.235712	0.0638108	0.11276	0.152769	0.0302566	0.154793	0.0397693	0.163748	0.0703247	0.390688	0.113461	0.0114743	-0.219249	0.204642
TCGA.FD.A3N5.01	-0.079295	-0.144833	-0.0192166	0.122055	0.0917099	0.0135463	0.0498407	0.046702	0.127088	0.0354381	0.153591	-0.175016	0.190968	0.107095	0.202579	0.206797	0.158749	0.0969244	0.0335714	0.179007	0.171687	0.0411147	0.134115	0.117209	0.220101	0.179592	0.20544	0.326522	0.41044	0.0192571	0.0646534	0.0333311	0.197932	-0.0914951	0.0944609	0.0894892	0.0739425	0.155648	-0.0864336	-0.0131059	0.00822426	0.139673	0.0496389	-0.252198	0.08102
TCGA.FD.A3N6.01	-0.103847	-0.11558	0.0243132	0.0698342	0.0540613	0.0390339	0.021982	0.0861821	0.0316859	0.0253117	0.0487601	-0.424565	0.113129	0.134347	0.0704972	0.188571	0.0825742	0.071355	-0.0354018	0.279598	0.217281	0.062772	-0.0378562	0.145409	0.269096	0.357194	0.148086	0.34342	0.360802	-0.109202	0.02379	-0.00159214	0.17344	-0.0700191	0.0800125	0.0515914	0.0859128	0.125949	-0.0841503	0.0373668	0.0816131	0.17708	0.10261	-0.195431	-0.133927
TCGA.FD.A3NA.01	-0.170056	-0.00616756	0.0572667	0.18681	-0.0467485	0.162148	0.123931	0.0885259	0.18108	0.0595408	0.0911041	-0.202478	0.13906	0.118904	0.10882	0.275859	0.177582	0.0482629	0.143709	0.218643	0.198487	0.00666308	0.191664	0.0991952	0.180489	0.270598	0.128293	0.205452	0.316296	-0.208357	0.0706636	0.104104	0.196761	0.1997	0.113268	0.0379301	0.200727	0.114555	0.0386875	0.122931	0.102774	0.17442	0.0345272	-0.132613	-0.00584271
TCGA.FD.A3SJ.01	-0.422638	-0.0622966	0.045122	0.0339917	-0.000783826	0.204407	0.109259	-0.0501938	0.100725	0.08761	-0.0208245	-0.0413207	0.0678827	0.116135	0.0445712	-0.0819395	-0.0191126	-0.00360898	-0.0793992	-0.0717453	-0.0135178	0.0128398	0.148079	-0.0598827	0.194033	0.235702	0.120387	0.230681	0.298007	-0.0415455	0.0878752	0.00657113	0.197517	0.197909	0.0353722	0.193445	0.150155	0.0434683	-0.145848	0.0567029	-0.0642845	0.13587	-0.00359555	-0.250844	0.168485
TCGA.FD.A3SL.01	-0.225599	0.105697	0.118394	0.154407	0.0251555	0.13988	0.0870207	0.0812976	0.131556	0.0332153	0.172315	0.155877	0.19728	0.0755003	0.139665	0.257331	0.15875	0.134668	0.11092	0.00744141	0.161681	0.123304	0.436993	0.150201	0.0528746	-0.0096401	0.0714399	0.129864	0.165752	0.14143	0.0123942	0.158484	0.0788598	0.211587	0.0867987	0.0838405	0.156401	0.109181	-0.0455995	0.0735691	0.0601205	0.116294	0.0744286	-0.234929	0.257677
TCGA.FD.A3SM.01	-0.099541	0.0216535	0.0702143	0.23942	0.0194935	0.149113	0.14414	0.174856	0.0454966	0.0332523	0.180204	-0.1182	0.145626	0.129759	0.172111	0.17206	0.0549567	0.116493	-0.0849511	-0.104413	-0.0221902	0.029708	0.271005	0.137421	0.0497521	0.0688913	0.107925	0.14588	0.122394	-0.0132362	-0.0280508	0.0930583	0.128361	0.15978	0.189882	0.0666336	0.182153	0.0979232	-0.0767552	0.139686	-0.128453	0.153959	0.158937	-0.255025	0.0755363
TCGA.FD.A3SN.01	-0.227791	-0.106466	0.0164332	0.154566	0.0209283	0.133726	-0.00742276	0.032082	0.101187	0.0288531	0.161771	-0.120246	0.180187	0.0480697	0.215816	0.196986	0.0679594	0.019077	0.00170684	0.178263	0.140291	-0.0153922	0.191719	0.177374	0.215966	0.347824	0.160168	0.209057	0.281456	0.0623818	0.0274075	0.0326052	0.247397	0.202599	0.112832	-0.0102087	0.135588	0.136922	-0.0397404	0.115349	0.0359537	0.150168	-0.0136558	-0.372401	0.147194
TCGA.FD.A3SO.01	-0.0939274	-0.112682	0.0158565	0.138077	0.0459467	-0.0242853	-0.0426543	0.0423894	0.13392	-0.0304389	0.166867	-0.14972	0.161426	0.00914268	0.0965492	0.226096	0.149686	0.0987655	0.196972	0.228302	0.265194	0.0945411	0.296758	0.194451	0.2059	0.293636	0.181286	0.291696	0.352148	0.171298	-0.0534143	0.129324	0.205642	0.163431	0.0544701	0.106444	0.0871014	0.170752	-0.13378	0.0773168	0.150886	0.153754	0.0522667	-0.135463	0.0135909
TCGA.FD.A3SP.01	-0.246859	0.0365566	-0.0551611	0.090779	0.0148223	-0.0244218	0.00229817	0.0418614	0.104341	-0.015152	0.244176	0.0386925	0.239587	0.108728	0.210339	0.299218	0.265092	0.275427	0.357225	0.190348	0.31604	0.199142	0.492391	0.183799	-0.0203331	0.0689887	0.198256	0.179143	0.222515	0.190158	0.0509264	0.1764	0.0835355	0.261118	0.078824	0.194642	0.0715232	0.112099	-0.0726855	-0.031909	0.340949	0.0874125	-0.0370989	-0.189899	0.152144
TCGA.FD.A3SQ.01	-0.470047	0.170973	0.0846387	0.147133	0.0320899	0.145014	0.109637	-0.01405	0.224249	-0.0427992	0.220268	0.134196	0.243504	0.348639	0.190773	0.251484	0.133592	0.236457	0.145207	0.319491	0.217857	0.0664908	0.397221	0.1265	-0.197556	0.00861692	0.050842	-0.143235	-0.274573	0.245525	0.104686	0.175895	-0.0451264	0.208855	0.0471275	0.145731	0.0146092	0.0499601	0.0277122	0.0872396	0.0569094	0.0780623	-0.00292013	-0.252822	0.246802
TCGA.FD.A3SR.01	-0.307375	0.0306669	-0.0480187	0.0648373	0.0655812	-0.0295358	-0.0478279	0.0433716	0.140627	0.0644347	-0.00528676	-0.142268	0.0653078	0.223938	0.192363	0.0042344	0.111179	0.146722	0.0356524	0.252794	0.274166	0.122368	0.220222	0.0835796	-0.0226632	0.0427033	0.136945	0.181849	0.167112	0.0639494	0.0732662	0.0385145	-0.011046	0.263132	0.10669	0.0652097	-0.0822864	0.109914	-0.0742586	-0.0230533	0.222977	0.155254	0.0281825	-0.0947852	0.0502829
TCGA.FD.A3SS.01	-0.298501	-0.0269522	0.0259716	0.221487	0.0419385	0.0860839	0.00194934	0.112462	0.0422074	0.0472191	0.020127	-0.185584	0.0862537	0.0459204	0.0770572	0.148081	0.00990571	-0.0684531	-0.189039	-0.0116315	-0.0440389	0.0305018	0.126397	0.0708753	0.159497	0.0228218	0.15216	0.226251	0.338675	-0.138152	0.106787	-0.0315451	0.0963136	0.131522	0.0613948	0.247313	0.240077	0.106959	-0.096946	0.0282052	-0.140714	0.111135	0.0810359	-0.151491	0.0881897
TCGA.FD.A43N.01	-0.375568	0.0319423	0.0880344	0.17796	0.00691854	0.164532	0.179082	0.0246785	0.165036	-0.0045923	0.0988449	0.171602	0.150489	0.165538	0.152796	0.291081	0.135839	-0.00543921	0.0130448	0.12421	0.160308	-0.0345422	0.165349	0.0467119	0.116906	0.151124	0.133318	0.114479	0.123876	-0.0778644	0.0256211	0.110037	0.101645	0.299513	0.0599833	0.0929802	0.0947631	0.0723092	-0.0988802	0.0971392	-0.0206659	0.133623	-0.0255747	-0.161146	0.0778483
TCGA.FD.A43P.01	-0.752193	-0.0872108	-0.0314602	0.0662573	-0.0629906	0.159693	0.0147026	0.0699244	0.135559	0.0981876	0.0510863	-0.173645	0.017408	0.127109	-0.0177623	0.170682	0.188684	-0.062201	0.178067	0.191472	0.387252	0.13636	0.0790226	-0.21642	0.127528	0.105273	0.105878	0.238483	0.3347	-0.0805579	0.0778746	0.0879121	0.159162	0.254896	0.0499777	0.200645	0.102247	0.0549026	-0.13395	-0.0634136	0.330795	0.0810967	-0.090131	-0.169185	-0.0638752
TCGA.FD.A43S.01	-0.37386	0.0249514	0.152657	0.115717	-0.0176787	0.125782	0.141854	0.0349483	0.114168	-0.0484565	0.137116	0.257954	0.203334	0.354571	0.191172	0.302744	0.22125	0.171587	0.18998	0.232728	0.243409	0.100392	0.2977	-0.0388479	0.0991839	0.111394	-0.0295363	-0.161895	-0.242117	-0.0879948	0.131806	0.176363	-0.023068	0.140899	0.106135	0.123384	0.30468	0.0311677	0.0789202	0.0639275	0.337646	0.0223921	-0.128795	-0.166067	0.268891
TCGA.FD.A43U.01	-0.32087	-0.0394123	0.0502345	0.109351	-0.0194728	0.0377297	0.124104	-0.0370196	-0.0230833	0.0143202	0.101135	0.287877	0.198015	0.0337563	0.149732	0.139937	0.196659	0.168046	0.2112	0.104381	0.210763	0.116799	0.347106	0.054891	0.105159	0.146962	-0.00409503	-0.0436275	0.0125641	-0.278784	-0.038506	0.096364	0.0102817	0.133035	0.078585	0.0604761	0.179503	0.0934622	0.0196167	0.0107373	0.293896	0.0703855	-0.133339	-0.232119	0.21546
TCGA.FD.A43X.01	-1.25716	-0.100311	-0.00366302	0.173393	-0.0151635	0.145085	0.0856925	-0.0441091	0.131016	-0.030584	0.0439422	-0.17054	0.0809105	-0.039633	0.136535	0.0979752	0.0063383	0.136154	-0.292008	0.0968311	-0.0803873	-0.0825846	-0.169492	0.0554253	0.211093	0.278327	0.0934481	0.0650882	0.0335076	-0.118497	-0.0160268	-0.00261633	0.0974466	0.035822	0.130715	0.110973	0.176875	0.117378	-0.0234985	-0.000372358	-0.134605	0.125008	0.0213949	-0.204906	0.00329027
TCGA.FD.A43Y.01	-0.114872	-0.0368871	-0.0810027	0.113057	-0.0161659	0.17823	0.0696581	-0.0371779	0.0512232	0.0134949	0.194668	0.0138832	0.155934	0.181706	0.138346	0.162849	0.0540969	-0.0651818	0.0503293	0.187768	0.221935	0.0841326	0.322332	-0.018675	0.190735	0.262051	0.062453	0.081504	0.228206	-0.204113	0.011	0.105549	0.223953	0.160711	0.125982	0.0404664	0.104054	0.123288	0.0701962	0.0904266	0.0828553	0.130529	0.0221669	0.0393542	0.0384605
TCGA.FD.A5BR.01	-0.315096	-0.0173989	0.0822141	0.138418	0.0283791	0.1704	0.125702	0.0660955	0.169638	0.00462249	0.165205	-0.0643944	0.174714	0.323249	0.0767362	0.318905	0.151444	0.110742	0.233886	0.0167227	0.112239	0.0717335	0.186552	0.00725948	0.0790647	0.227442	0.052285	0.0784734	0.107889	-0.0569882	0.0631418	0.159965	0.0711807	0.221893	0.14085	0.119264	0.0803064	0.0736293	-0.0601399	0.0524084	0.174729	0.110534	-0.0505196	-0.225137	0.117527
TCGA.FD.A5BS.01	-0.129744	0.0778996	0.0883938	0.145466	0.0492829	0.0777516	0.148238	0.0595167	-0.0314265	0.0470715	0.148776	0.376707	0.181706	0.063856	0.139201	0.265834	0.219128	0.360988	0.316269	0.335194	0.427068	0.205582	0.423884	-0.00359913	0.101731	0.0904442	-0.0261091	-0.0153907	0.0638396	0.118082	0.0764528	0.151423	0.089304	0.0789695	0.00506327	0.0387907	0.247766	0.097803	0.063579	0.0724016	0.412184	0.100923	-0.0608609	-0.202011	0.18863
TCGA.FD.A5BT.01	-0.0655236	0.0129368	0.0540944	0.171344	-0.0296661	0.0583068	0.0343743	-0.0141942	-0.00805145	0.0339757	0.115702	0.197834	0.17587	0.13731	0.168332	0.292298	0.159766	0.268281	0.229508	0.259892	0.29837	0.117402	0.455636	0.048802	0.177275	0.239025	-0.0187502	0.0360643	0.0379039	-0.0556489	0.0459603	0.0704818	0.0565804	0.153344	0.0483331	0.0758516	0.251333	0.15326	0.0236926	0.0557339	0.337447	0.117848	-0.0597477	-0.113623	0.246858
TCGA.FD.A5BU.01	-0.100615	-0.113892	0.0160069	0.123657	0.0444607	0.0354418	0.0911064	-0.0135153	0.0637359	-0.00467494	0.142818	-0.209852	0.219281	0.188844	0.166606	0.247564	0.16312	0.135883	0.173292	0.285178	0.247915	0.104234	0.351744	0.0846714	0.213359	0.307986	0.108018	0.194757	0.202962	-0.157476	0.0095514	0.130634	0.245998	0.146337	0.0978483	0.125593	0.233753	0.105874	-0.000878704	0.050344	0.211914	0.16645	0.0219991	-0.168149	0.167434
TCGA.FD.A5BV.01	-0.447025	0.0254256	0.0697727	0.16147	0.0118977	0.230023	0.0509957	0.160823	0.0648111	-0.0193528	0.0647633	0.0130616	0.105686	0.230502	0.0798418	0.133834	0.0888572	0.0202892	0.0445734	-0.00759583	-0.134346	-0.0419676	0.0241986	0.0789122	0.241302	0.275507	0.069091	0.21354	0.308052	-0.12181	0.024721	0.0842879	0.234124	0.0723982	0.180485	0.0158203	0.0754586	0.0647548	-0.125242	0.116973	-0.0540235	0.136752	0.0867907	-0.255389	-0.00495914
TCGA.FD.A5BX.01	-0.0679198	-0.000787944	0.0818502	0.0889839	-0.00567629	0.0379953	0.0240198	0.0778903	-0.0693564	-0.0136592	0.171517	0.264682	0.195312	-0.0546774	0.192322	0.276254	0.190339	0.298802	0.155524	0.200921	0.183893	0.189148	0.361847	0.117227	0.235818	0.272696	0.0257502	0.0405619	0.0515532	-0.0245743	-0.0342301	0.131457	0.169426	0.188686	0.0815779	-0.0295437	0.191781	0.096733	0.0998166	0.123387	0.153989	0.195395	-0.0112567	-0.0474196	0.192037
TCGA.FD.A5BY.01	-0.177825	-0.0720733	-0.0129372	0.180029	0.0342407	0.0623649	0.0579143	0.0260496	0.0662195	0.0434624	0.0729227	-0.141026	0.16129	0.143923	0.115317	0.122825	0.0236302	0.0356163	0.0570821	0.169893	0.0334525	0.0591574	0.215481	0.0967548	0.239837	0.19323	0.113275	0.267944	0.33635	-0.333327	0.0675553	0.0190414	0.161913	0.0627505	0.137707	-0.0125619	0.155394	0.0708018	0.067593	0.0810817	0.00379208	0.102888	0.0388497	-0.216896	0.159922
TCGA.FD.A5BZ.01	-0.303849	0.0298662	0.0653527	0.202624	-0.0103419	0.176438	0.152299	0.0336169	0.149107	-0.0117393	0.181536	0.117205	0.257607	0.182759	0.174343	0.263291	0.142946	0.162011	-0.0337776	0.0216289	0.104817	0.030512	0.456176	0.136356	-0.0143602	0.0583354	0.0682939	0.090672	0.113045	-0.012782	0.0665241	0.1371	0.0561482	0.184669	0.115983	0.167846	0.0652998	0.0845796	0.0123039	0.0667507	-0.059058	0.0856545	0.0174208	-0.227625	0.198364
TCGA.FD.A5C0.01	-0.136555	-0.0866081	0.0601745	0.201488	0.0491545	0.0664662	0.0450077	0.129383	0.14633	0.00486363	0.142261	-0.222171	0.110981	0.162024	0.0981672	0.252508	0.0453421	0.0695532	-0.0126974	-0.0170812	-0.0847834	0.0809414	0.09066	0.0410964	0.17871	0.141248	0.137719	0.270197	0.314465	-0.245266	0.00981256	0.0510376	0.103012	0.224487	0.185919	0.0613254	0.05139	0.146434	-0.0780538	0.0523909	-0.0299569	0.17143	0.144167	-0.267224	0.142153
TCGA.FD.A5C1.01	-0.114325	0.0842724	-0.0160729	0.116546	0.0206864	0.14413	0.059722	-0.0134423	0.151254	0.00898371	0.131234	-0.106056	0.185659	0.120632	0.125521	0.312384	0.139239	0.183889	0.243333	0.364303	0.362848	0.134667	0.281535	0.0718316	0.238206	0.268942	0.0179514	0.10237	0.261357	-0.0301654	0.0399641	0.142449	0.319651	0.0206007	0.0767488	-0.0810275	0.246732	0.120734	0.0846929	0.11264	0.315303	0.124949	-0.00677998	-0.22767	0.069067
TCGA.FD.A62N.01	-0.101962	-0.0569928	0.0113338	0.0672447	0.0250548	0.000969709	0.0706419	0.0705571	0.0751198	-0.0122467	0.169899	0.11143	0.231154	0.106323	0.177851	0.3127	0.273691	0.256798	0.298496	0.393068	0.455435	0.221321	0.386576	0.0860616	0.201024	0.234627	0.0773947	0.113676	0.212088	0.00125731	-0.0129852	0.123182	0.176767	0.197709	0.0512975	0.214925	0.264171	0.126088	-0.0141397	0.112041	0.405158	0.0954841	-0.0790383	-0.0903021	0.101615
TCGA.FD.A62O.01	-0.378981	-0.0486735	0.133448	0.128137	0.0124559	0.126132	0.146173	0.0558469	0.101061	0.0207893	0.0609252	-0.250955	0.0695721	0.144571	0.137175	0.13824	-0.0111449	0.073202	-0.0769651	0.0795933	-0.0488714	-0.0563779	0.0341664	0.136092	0.236398	0.235474	0.143124	0.216137	0.218497	-0.026936	-0.0417856	0.109619	0.127164	0.172521	0.025181	0.217557	-0.0306305	0.121459	-0.0973521	0.0932058	-0.0751986	0.157118	0.0617292	-0.333151	-0.0245399
TCGA.FD.A62P.01	-0.128254	-0.0549214	0.0232284	0.186679	0.0519262	0.124411	0.0537916	-0.0509354	0.0505752	0.013373	0.154229	-0.170869	0.195561	0.163696	0.127729	0.280212	0.0521706	0.121129	0.159706	0.0316869	0.259136	0.102992	0.209239	-0.0545163	0.200547	0.295825	0.0456904	0.136099	0.251601	-0.187258	0.0619627	0.0875063	0.246273	0.191522	0.148131	0.0769708	0.204276	0.124402	0.0067586	0.0562298	0.207171	0.201581	-0.012257	-0.155911	0.118024
TCGA.FD.A62S.01	-0.134242	-0.0407336	-0.0208964	0.0868994	-0.00879001	0.0599724	-0.0707572	-0.0751734	0.0541718	0.0200468	0.135775	0.0729631	0.214174	0.218358	0.20959	0.254437	0.222979	0.297016	0.300537	0.222648	0.281161	0.160702	0.453167	0.165277	0.0569896	0.229038	0.182864	0.259208	0.288527	0.0964577	0.0772891	0.145284	0.159206	0.20875	0.0873524	0.129989	-0.0277321	0.10548	0.110532	0.0711307	0.269216	0.102607	-0.0035401	-0.138454	0.113525
TCGA.FD.A6TA.01	-0.256576	0.0323578	0.110519	0.14019	-0.0268953	0.0989235	0.161266	0.0712423	0.0848436	0.0291246	0.0467598	-0.0481592	0.177234	0.154747	0.131116	0.238943	0.156834	0.197242	0.147661	0.0955823	0.260378	0.159573	0.270841	0.0437098	0.118044	0.117324	0.065379	0.0691604	0.209146	-0.036969	0.0890676	0.118239	0.140538	0.159521	0.0929187	0.0370294	0.0148509	0.0644481	-0.113167	-0.0286692	0.256614	0.149086	-0.00831139	-0.150249	0.191959
TCGA.FD.A6TB.01	-0.309731	0.0640511	0.108997	0.11881	0.00259435	0.0701335	0.118362	0.0269371	0.109793	-0.0091255	0.135368	0.0395222	0.202636	0.239191	0.109772	0.333922	0.185631	0.10211	0.295396	0.186892	0.32979	0.15768	0.248881	-0.0975311	0.00984633	0.0289279	0.0672624	0.0934514	0.170536	-0.0268034	0.0979044	0.166387	0.0463966	0.159964	0.0795983	0.215079	0.0788221	0.020582	-0.0600224	0.0855848	0.359186	-0.00818727	-0.131112	-0.113303	0.163133
TCGA.FD.A6TC.01	-0.527317	-0.104412	0.0330978	0.177999	0.0168034	0.062681	0.00434665	0.00455233	0.105106	0.0312936	0.138665	-0.111169	0.161076	0.138566	0.130779	0.197603	0.054837	0.12187	0.0548684	0.0581799	-0.0732129	0.0358287	0.271757	0.0228864	0.140008	0.130195	0.072328	0.197814	0.263927	-0.0935552	0.0367307	0.0756226	0.0101327	0.133833	0.147106	0.117117	0.0639818	0.106864	-0.0534297	0.03504	-0.0534732	0.0984006	0.0346374	-0.264181	0.155595
TCGA.FD.A6TD.01	-0.0952087	-0.00651429	0.0989339	0.178005	0.00191368	0.180529	0.0641098	-0.000169524	-0.0150321	-0.062432	0.169079	0.201065	0.139616	0.0417129	0.179542	0.30042	0.178585	0.174285	0.24995	0.364052	0.281859	0.142805	0.271381	-0.0081468	0.271457	0.321335	0.0480152	0.17689	0.284073	-0.22938	0.0389682	0.154407	0.213984	0.0633603	0.0693533	-0.0105147	0.244064	0.116111	0.292336	0.0456426	0.301583	0.146761	-0.0610075	-0.090294	0.0475017
TCGA.FD.A6TE.01	-0.598176	0.0557991	0.0635266	0.177386	0.0327853	0.199053	0.161761	0.121727	0.173861	0.062643	0.118148	-0.0510578	-0.029441	0.0472635	0.118899	0.0679384	0.019144	-0.0363808	-0.17277	0.0699862	0.118166	-0.0274828	-0.26562	-0.0840776	0.0939086	-0.102949	0.128006	0.264845	0.38586	-0.281526	0.00226935	0.00934592	0.0749062	-0.051388	0.0676914	0.0649022	0.15861	0.0696999	-0.038618	0.0924839	-0.0449843	0.0644889	0.0800636	-0.158542	-0.0156948
TCGA.FD.A6TF.01	-0.199215	-0.0142991	0.0646066	0.164262	0.00189092	0.0706403	0.0461848	-0.0685484	0.107401	-0.00536257	0.12248	0.10131	0.185228	0.128773	0.0485477	0.275399	0.147148	0.0912381	0.102439	-0.275727	-0.00682932	-0.00751931	0.38301	0.044173	0.24641	0.257582	0.0871945	0.0890549	0.253782	-0.0747656	0.0569099	0.130262	0.197108	0.142342	0.0238006	-0.0345831	0.184175	0.184344	-0.00892132	0.0873237	0.0321303	0.097206	-0.0712648	-0.211826	0.256315
TCGA.FD.A6TG.01	-0.270295	-0.0387594	0.0120772	0.124901	-0.00196531	0.00455324	0.0540854	0.0274966	0.0992621	-0.0327812	0.0614586	0.0747125	0.181001	0.111045	0.166491	0.0174382	0.128401	0.134792	0.0161444	-0.141709	0.0590823	0.146843	0.281389	-0.0985959	0.0995828	0.213349	0.116386	0.165012	0.187572	0.000144834	0.117191	0.114823	0.066179	0.223786	0.127652	0.157395	0.0964099	0.0738416	-0.0819331	0.0596079	0.174982	0.128753	-0.0579029	-0.134502	0.193528
TCGA.FD.A6TH.01	-0.197202	-0.0264102	0.0819705	0.224272	0.0238854	0.151145	-0.013883	0.0861746	0.107809	0.0139354	0.144991	-0.00316806	0.113573	0.0142073	0.134853	0.231569	0.026452	0.0778883	-0.144906	0.0567458	0.0454185	0.115468	0.219482	0.158744	0.266726	0.209768	0.207085	0.260915	0.330303	0.0768578	-0.0306414	-0.0193456	0.22068	0.169919	0.076552	0.240483	0.274281	0.12814	0.100882	0.138777	-0.00263481	0.151696	0.064425	-0.173928	0.115281
TCGA.FD.A6TI.01	-0.27123	0.119332	0.133439	0.212463	0.0863304	0.263419	0.158751	0.191323	0.225082	0.019122	0.172239	-0.0971683	0.0779285	0.187704	0.0261296	0.364394	-0.00828308	0.0805792	0.00995995	0.239535	0.072244	0.00332249	-0.0287825	0.00818009	-0.0164744	0.0478703	0.0298247	-0.0748062	-0.158013	-0.0571521	0.0160688	0.084289	0.0353772	0.0811323	0.119576	0.115277	0.206957	0.101774	-0.0621543	0.223164	-0.0621652	0.145595	0.171463	-0.141084	0.098959
TCGA.FD.A6TK.01	-0.142828	-0.0420945	-0.0907877	0.0893137	0.0326026	0.0109746	-0.0598149	0.141735	0.0453538	-0.00582451	0.125199	0.0180201	0.245179	0.0532236	0.121037	0.276709	0.251785	0.274106	0.216844	0.219317	0.378042	0.120493	0.446384	0.188686	0.205427	0.293081	0.128788	0.221985	0.260698	-0.0780736	-0.00188134	0.182586	0.147768	0.0959184	0.0743766	0.0193977	0.192926	0.0989642	0.00362623	0.0740371	0.307	0.135083	0.0190147	-0.25761	0.175128
TCGA.FJ.A3Z7.01	-0.594969	0.0212359	0.0451002	-0.00235195	0.0421051	0.141777	0.0579715	0.110983	0.00250948	0.0384329	0.0908736	0.0371294	0.0655687	0.172065	0.0420533	0.393172	0.144917	0.0490822	0.139817	-0.00765958	-0.0387287	0.0320722	0.225011	-0.020547	0.0748291	0.130606	0.0850623	-0.0311413	-0.0203542	-0.0841132	-0.021328	0.0569259	0.0556514	0.199568	0.0782927	0.00262943	0.124856	0.0271716	-0.014438	0.0858824	-0.0297378	0.108947	0.0501397	0.0163323	0.0776772
TCGA.FJ.A3Z9.01	-1.08716	-0.0383675	0.0591137	0.15887	0.00604309	0.129519	0.129886	0.00621656	0.132978	0.0114975	0.0965816	-0.188169	0.0588638	0.161469	0.111464	0.124805	-0.00905292	0.0662583	-0.263712	0.0865888	-0.0578091	-0.0323686	-0.145999	0.191752	0.202853	0.242497	0.104196	0.154757	0.21827	-0.151336	0.0166572	-0.00754092	0.13546	0.0837278	0.103815	0.0775854	-0.0178733	0.0579416	-0.116322	0.0783936	-0.0850367	0.0936133	0.059248	-0.164638	-0.0203777
TCGA.FJ.A3ZE.01	-1.62234	-0.187538	0.0539781	0.100276	0.0235529	0.174904	0.0558898	0.145796	0.0671759	0.0498804	-0.0208229	-0.323503	-0.000332873	-0.0529245	0.0409342	0.0114355	-0.0774374	-0.0409255	-0.174614	-0.0895484	-0.0637826	-0.0196249	-0.149199	0.0526964	0.124109	0.0994572	0.0590773	0.213227	0.299158	-0.174889	0.083659	-0.00336216	0.0853168	0.0349312	0.120352	0.0831642	0.0209498	0.0360988	-0.0622969	0.0395891	-0.182193	0.112834	0.226952	-0.265908	-0.0468321
TCGA.FJ.A3ZF.01	-1.10341	0.091049	0.101432	0.0202117	-0.0637852	0.151874	0.109152	0.0911508	0.0481545	0.115768	-0.0275281	-0.292039	-0.0151862	0.121538	0.0153358	-0.0457973	0.0397277	-0.0508737	-0.0837976	-0.01777	-0.118685	-0.108038	-0.206253	0.0110236	0.202214	0.11971	0.130447	0.203773	0.294455	-0.201054	-0.00515631	-0.0954358	0.163794	0.0808073	0.0722018	-0.0575482	-0.0886696	-0.00802737	-0.174759	0.0388828	-0.13498	0.0928838	-0.0346991	-0.126559	-0.0614272
TCGA.FJ.A871.01	-0.19767	-0.113792	-0.0110309	0.163658	-0.0285376	0.145421	0.0493666	0.00672616	-0.0499581	0.0635851	0.0476927	0.0594709	0.116915	-0.0290869	0.0507627	0.152803	0.115315	0.075994	-0.155604	-0.0491307	-0.12611	-0.0572991	0.34748	0.171744	0.344661	0.396503	0.0952291	0.17137	0.289041	0.0480595	0.0366186	-0.0599241	0.254431	-0.00728726	0.0606136	0.197753	0.151862	0.159995	-0.0399689	0.0401524	-0.0719886	0.196745	-0.0645491	-0.180897	0.123097
TCGA.FT.A3EE.01	-0.169005	-0.0746189	0.0521019	0.202946	0.0112065	0.142151	0.0446568	0.116118	0.174659	0.0386075	0.0832559	-0.303667	0.100202	0.194924	0.0608758	0.202898	0.0636166	0.0202755	0.0419558	-0.00467338	-0.157739	-0.0720422	0.0572433	0.259505	0.290081	0.354807	0.148096	0.161668	0.154339	-0.0282726	-0.0145716	0.160028	0.324713	0.210262	0.139299	0.0248898	0.174592	0.155588	-0.0109792	0.177284	-0.0311247	0.270923	0.153467	-0.170485	-0.049087
TCGA.FT.A61P.01	-0.0862533	0.0197069	0.0406794	0.198939	0.0256296	-0.026365	-0.00473263	0.0317781	0.151383	-0.0416551	0.150559	0.0400734	0.199562	0.136621	0.136953	0.26319	0.21811	0.0762982	0.166125	0.203928	0.331604	0.146468	0.374343	0.0998923	0.227437	0.199385	0.183084	0.186654	0.296525	-0.168866	-0.0476468	0.199568	0.154411	0.103577	0.0976147	0.0581082	0.152611	0.150185	-0.0112794	0.120666	0.265576	0.121499	0.00163305	-0.17111	0.134683
TCGA.G2.A2EC.01	-0.413175	0.0550514	0.183116	0.101787	0.0757765	0.176453	0.149892	0.0484998	0.230265	-0.0586275	0.0743065	0.0568099	0.197428	0.160664	0.255665	0.0669966	0.244161	0.301432	0.116859	0.114176	0.117161	-0.00984416	0.276068	0.198267	0.0672577	-0.186632	0.0189199	-0.0410886	-0.148749	0.0755642	0.0604466	0.1548	-0.00176037	0.279213	0.12172	0.241489	0.0113696	0.0214098	-0.0688295	0.0931869	0.217904	0.0746047	0.118896	-0.294799	0.133543
TCGA.G2.A2EF.01	-0.384221	-0.0878195	-0.107302	0.0433434	0.00669584	0.0221667	-0.0704307	0.0634974	-0.108349	0.0394475	0.0577492	-0.214814	0.146601	0.0708981	0.141585	0.121673	0.209682	0.0530928	0.175771	0.405373	0.358499	0.13629	0.216901	0.0963312	0.260922	0.328586	0.142806	0.281974	0.351822	-0.480413	-0.0122347	0.0847313	0.252787	-0.163893	0.139475	-0.0176014	0.0841943	-0.000767159	-0.0397639	0.0423138	0.257418	0.124074	0.100499	-0.0194972	0.0252425
TCGA.G2.A2EJ.01	-0.0733288	-0.0278224	0.0357519	0.161759	0.0549756	0.104765	-0.00833429	0.0717332	0.0394761	0.00636075	0.111686	-0.286227	0.136443	0.102173	0.11221	0.276184	0.111042	-0.0754695	0.0779403	0.365468	0.260223	0.0972137	-0.0435764	0.160583	0.271459	0.368716	0.135959	0.320882	0.312207	-0.166334	-0.0296955	0.0335387	0.276309	-0.0907942	0.179599	0.0426725	0.150571	0.124737	-0.0683974	0.0678406	0.0270371	0.241039	0.187924	-0.0530362	-0.123686
TCGA.G2.A2EK.01	-1.17342	-0.0261426	0.143926	0.10227	0.093213	0.0808474	0.174843	0.120715	0.23811	-0.0155926	0.0867491	-0.276438	0.0929723	0.224401	0.131219	-0.0355161	0.067557	0.0109279	-0.00653779	0.0152116	0.00184997	0.0515888	-0.0566424	-0.00667868	0.0575301	0.075953	0.018353	0.00552862	-0.0829926	0.0177647	0.142604	0.0594216	-0.0525813	0.138832	0.0324732	0.134651	-0.0699072	0.0648022	0.0383679	0.076186	0.0514877	0.047114	0.113114	-0.23873	0.10471
TCGA.G2.A2EL.01	-0.292427	-0.0811248	-0.0221514	0.0388764	0.0374734	0.179757	-0.10325	0.0264031	0.0564923	0.196673	0.0696327	-0.258249	-0.00136551	0.0526309	0.0502907	-0.182168	-0.0994875	-0.221117	-0.247061	-0.0905933	-0.15585	-0.00521051	-0.159331	0.00137602	0.247862	0.198949	0.127939	0.361726	0.463464	0.130312	0.12068	-0.0330967	0.234902	-0.131968	0.0321553	-0.0603607	-0.144975	0.133738	-0.213925	-0.0753882	-0.172574	0.166214	0.10556	0.335631	-0.038329
TCGA.G2.A2EO.01	-0.112622	-0.155253	0.142106	0.165978	-0.0154624	0.165957	0.0504913	0.160415	0.00613314	0.0240761	0.111617	0.0255022	0.0652023	-0.0382409	0.0853922	0.243408	0.185051	0.232503	0.0727288	-0.0733233	0.151552	0.0334934	0.287702	0.0412419	0.327049	0.296839	0.000128758	0.178048	0.296303	-0.0623383	-0.0948731	0.115284	0.267831	-0.00131368	0.152423	0.131954	0.196322	0.105586	-0.0180846	0.0676902	0.289999	0.218453	-0.0142658	-0.216173	0.0840671
TCGA.G2.A2ES.01	-0.15894	-0.21318	0.0852965	0.148992	0.014108	0.0290188	-0.0128741	0.119883	0.0843303	0.0217761	0.122704	-0.233212	0.17533	0.0675027	0.0886406	0.26114	0.0944352	-0.0460717	0.200874	0.243206	0.32933	0.0807784	0.148476	0.128177	0.343639	0.38098	0.124195	0.2833	0.348935	-0.211946	-0.0430773	0.0849062	0.282124	0.0864832	0.104664	0.0129337	0.140783	0.114352	-0.0732728	0.100736	0.163593	0.213545	0.0250989	-0.218252	-0.0617439
TCGA.G2.A3IB.01	-0.129991	-0.0956952	-0.00362806	0.182518	0.0658798	0.0548549	0.146964	0.126826	0.052074	-0.0108808	0.125618	-0.400542	0.188349	0.227277	0.125169	0.176243	0.103292	0.0012272	-0.051748	0.11742	0.116361	0.0181096	0.0779195	0.0891754	0.283769	0.350571	0.177049	0.286378	0.328588	0.00486822	0.0334886	0.0241322	0.285034	-0.00520831	0.149304	0.123876	0.133409	0.0960354	0.062036	0.0917081	-0.0771155	0.15535	0.0622341	-0.218597	-0.0284642
TCGA.G2.A3IE.01	-1.65047	-0.0327871	0.064939	0.109748	0.0177614	0.154126	0.138789	0.042152	0.188535	0.00527815	0.00204354	-0.228197	0.0412277	0.141028	0.1795	0.0467446	0.0788535	0.080999	-0.114863	0.0824109	-0.0653642	-0.0568097	-0.169233	0.146689	0.155976	0.0829568	0.0495449	0.0873848	0.0339061	0.0194361	0.0200174	0.0128203	0.110368	0.18982	0.159261	0.140473	0.12895	0.0257699	0.0186887	0.104942	-0.103668	0.127186	0.0631819	-0.169077	-0.0217717
TCGA.G2.A3VY.01	-1.0948	-0.0591166	0.0179392	0.11405	0.0122644	0.256356	0.125279	0.0643625	0.162541	0.101833	0.0998588	-0.11784	0.00690572	0.161737	0.0960937	-0.0567335	0.0108116	0.0844697	-0.134794	-0.0403145	-0.026352	-0.0113428	-0.143376	0.0727383	0.0911633	0.0749507	0.137872	0.229621	0.283376	-0.0627564	0.0309391	-0.0475796	0.0669695	0.130048	0.123779	0.162135	0.0593302	0.0572815	-0.149058	0.0291189	-0.177496	0.229103	0.136426	-0.232727	-0.0326768
TCGA.G2.AA3B.01	-0.801175	0.11965	0.239511	0.115984	-0.000895025	0.205696	0.164167	0.13647	0.0806009	0.0310734	-0.012076	-0.240832	-0.012194	0.20802	0.000901944	0.0650803	0.0283818	0.0597121	-0.0863112	0.155133	0.113913	-0.0373949	-0.18171	0.00518965	0.239809	0.183678	0.0345643	0.174446	0.316699	-0.0717659	0.0267966	-0.0476591	0.209248	-0.0131729	0.120984	-0.0857071	0.121949	0.0363715	-0.0615297	0.0959227	-0.00577537	0.155807	0.0584813	-0.110682	-0.0693349
TCGA.G2.AA3C.01	-0.254087	-0.104086	0.0399585	0.154694	0.0166615	0.0246507	0.112112	0.0141657	-0.107609	0.00108188	0.0512508	0.0152744	0.147555	-0.0420357	0.153069	0.149822	0.139711	0.101908	0.12008	0.140657	0.163164	0.0996002	0.179803	-0.0380051	0.344386	0.358624	0.0907334	0.160684	0.296661	-0.18119	-0.142482	0.0156503	0.270216	0.0249308	0.0769661	-0.098017	0.375944	0.137495	-0.0322445	0.111589	0.15156	0.177616	0.00807012	-0.0385278	0.0576671
TCGA.G2.AA3D.01	-1.69384	-0.0769669	0.0964238	0.162436	-0.0140082	0.12577	0.198227	0.0970547	0.100764	0.077592	0.0818362	-0.0629079	0.114063	0.173854	0.0670579	0.0776489	-0.00525155	0.222149	-0.160705	0.092558	0.157596	-0.0213628	-0.293498	-0.061106	0.108347	0.193875	0.0772575	0.212789	0.282023	-0.0934676	0.099176	-0.0118827	0.166473	0.103001	0.18515	0.0853258	0.110475	0.171673	-0.0589612	0.0787959	-0.129296	0.167033	0.0131708	-0.243681	-0.0535964
TCGA.G2.AA3F.01	-1.04469	0.0287778	0.112788	0.184874	0.0185137	0.194712	0.156041	0.102252	0.194228	0.0542699	0.0449768	-0.149997	0.0404445	0.168467	0.0931379	0.0174494	-0.0156369	-0.0693419	-0.22559	-0.0468938	-0.0322366	-0.0542878	-0.150402	0.0232481	0.166296	0.165411	0.136895	0.201503	0.229272	-0.0253673	-0.0159641	-0.0440227	0.186554	0.257459	0.0813942	0.0679668	-0.0561119	0.0892337	-0.143387	0.068242	-0.129147	0.174568	0.0672865	-0.258993	-0.0597372
TCGA.GC.A3BM.01	-0.675259	-0.0474144	-0.0492952	0.0810786	0.0295805	0.0926979	0.0706681	0.03145	0.102513	0.0346045	-0.106742	-0.266217	0.053763	0.0433864	0.162989	0.121066	0.0281671	0.117734	-0.190403	0.200114	0.162868	-0.0087725	-0.214573	0.17197	0.236033	0.362295	0.0968944	0.264968	0.243911	-0.22372	0.0380229	0.0329535	0.0634136	0.0434858	0.11758	0.17099	0.0422033	0.100206	-0.0451171	0.0489927	-0.0808431	0.124125	0.0637802	-0.274623	-0.116601
TCGA.GC.A3I6.01	-0.240833	-0.163145	-0.0702371	0.160462	0.0621735	0.0503456	-0.0171785	0.0654023	0.133324	0.0215019	0.0714215	-0.422366	0.118499	0.0990172	0.111467	0.202554	0.074542	0.14246	0.124613	0.332404	0.309668	0.118971	0.0478109	0.100007	0.0578207	0.0404532	0.168023	0.304481	0.396133	-0.0585485	0.106886	0.106332	0.0393017	0.0554153	0.063413	0.0997381	0.0941254	0.0445638	0.0348707	0.0519768	0.101179	0.0666857	0.0689791	-0.270743	-0.0273293
TCGA.GC.A3OO.01	-0.385141	-0.0114733	0.117748	0.158448	0.0981805	0.0716413	0.075398	0.129143	0.211628	-0.0406088	0.0829771	0.0512023	0.186359	0.202077	0.133361	0.231274	0.109941	0.0499102	0.106415	0.19051	0.109728	0.0884916	0.197778	0.0446254	0.0562558	0.0142689	0.220631	0.252189	0.278717	0.211549	0.0820653	0.116551	-0.0132108	0.193238	0.140484	0.13503	0.0478366	0.0874886	-0.0519868	0.0880458	-0.104955	0.0400459	0.0907665	-0.22571	0.181728
TCGA.GC.A3RB.01	-0.352059	-0.200166	0.0223092	0.158907	-0.00839616	0.0956159	0.0358639	0.035181	0.227401	0.0343526	0.00939052	-0.401204	0.104362	0.148091	0.0869097	0.0742686	0.0540183	-0.0108971	-0.196514	0.15838	0.116897	-0.0295312	-0.0772331	0.164344	0.343093	0.436412	0.180426	0.357973	0.357769	0.00959369	0.0261209	0.0513703	0.255581	0.203041	0.13475	0.167838	0.115815	0.14772	-0.156294	0.0688205	-0.0305513	0.26693	0.00471811	-0.191489	-0.11182
TCGA.GC.A3RC.01	-0.0875981	-0.146376	-0.0707074	0.11231	0.068735	0.00712034	-0.0219927	-0.0495647	0.0340031	0.000281389	0.115011	-0.0608263	0.13448	0.100502	0.173762	0.177367	0.168891	0.12832	0.166185	0.312758	0.295553	0.152409	0.147711	0.124395	0.159776	0.241816	0.192492	0.315794	0.375012	-0.0196985	0.0116267	0.106886	0.194283	-0.0117171	0.114343	0.115746	0.0890602	0.118119	-0.0761822	0.008783	0.24936	0.18574	0.0669624	-0.179472	-0.112208
TCGA.GC.A3RD.01	-0.501044	-0.145662	-0.0124505	0.119672	-0.00714644	0.137796	0.0783053	0.0249586	0.20716	0.051908	0.0353372	-0.154586	0.0715581	-0.0504844	0.136803	0.130487	0.0057083	0.116981	-0.113005	-0.0306792	-0.00932385	0.0038564	-0.0613979	-0.046068	0.160701	0.208962	0.0971698	0.162205	0.213164	-0.295206	0.0484625	0.00538562	0.103473	0.107449	0.0938306	0.150246	0.0658153	0.071937	-0.0225406	0.0672147	-0.0894162	0.173324	0.10834	-0.298087	-0.0338761
TCGA.GC.A3WC.01	-0.324428	0.00167273	0.0194373	0.0261605	0.0322065	-0.115446	0.0813611	0.0476198	-0.00703589	0.0332424	-0.04294	-0.193288	0.112324	0.236036	0.13163	0.201608	0.15371	0.159942	0.18418	0.283023	0.371917	0.175491	0.0103578	-0.0119206	0.123568	0.256912	0.0520402	0.294987	0.306634	-0.127459	0.071932	0.162617	0.17453	-0.0788045	0.046256	-0.0929459	0.143686	0.0592097	-0.0629859	0.0683327	0.338871	0.06515	-0.0516835	-0.0673291	0.0262637
TCGA.GC.A3YS.01	-0.199645	-0.04636	-0.0515542	0.112105	-0.036541	0.0361032	0.0591203	-0.000828762	0.00672496	0.0166914	0.0850475	-0.277562	0.186216	0.229736	0.0845777	0.222225	0.104892	0.188546	0.145663	0.115684	0.0138137	0.0438895	0.374062	0.192083	0.248112	0.28051	0.0711411	0.296664	0.355569	-0.201708	0.0459804	0.0809263	0.151186	0.153974	0.0808697	0.164805	0.0410925	0.0347378	0.0671022	-0.0267012	0.0763349	0.119131	-0.0227958	-0.116427	0.0700185
TCGA.GC.A4ZW.01	-0.325551	-0.05651	-0.0438314	0.113206	0.0739177	0.156155	0.0177607	0.0834816	0.21848	0.0989461	0.0499098	-0.168374	-0.000592318	-0.0368868	0.0223703	0.130972	-0.0270822	-0.115382	-0.191024	-0.0298743	-0.0570576	-0.0389706	-0.164991	0.103743	0.21264	0.208596	0.181352	0.288467	0.387101	-0.338342	0.0539652	-0.0152331	0.185717	0.0368034	0.115563	0.255751	0.0995563	0.21402	-0.152961	0.0681505	-0.109868	0.195952	0.12687	-0.17203	-0.0179438
TCGA.GC.A6I1.01	-0.0743564	-0.068251	0.0529758	0.196372	-0.00179747	0.124346	0.0544299	0.056643	-0.0158436	0.00928674	0.0352564	-0.0626001	0.158367	0.0049493	0.153436	0.295084	0.178937	0.264645	0.374628	0.297157	0.324668	0.198075	0.158611	0.0349543	0.331521	0.378918	0.0339297	0.203064	0.210918	-0.302348	-0.0490799	0.0467313	0.326194	-0.0722783	0.0864461	0.0605201	0.237476	0.174807	0.0543908	0.0661491	0.410492	0.207016	0.0423267	-0.0485687	-0.0155588
TCGA.GC.A6I3.01	-0.423201	-0.0253813	0.0695041	0.115757	-0.0161611	0.122771	0.158029	-0.0534642	0.0614941	0.0436875	-0.0173119	-0.133462	0.0665039	0.107418	0.166751	0.0951325	0.139257	0.107743	0.0807441	0.16213	0.255579	0.0505942	0.0325818	-0.17059	0.275586	0.282345	0.0127849	0.0804131	0.159322	-0.357286	0.0170317	-0.0260681	0.147511	0.0807686	0.0546138	0.0482134	0.179523	0.079191	-0.0779784	0.0312035	0.271704	0.110238	-0.145595	-0.207198	0.092641
TCGA.GD.A2C5.01	-0.558205	0.0185802	0.0700998	0.210936	-0.0130695	0.144134	0.143998	0.0882764	0.111424	0.0558594	0.0083014	-0.117888	0.0730623	0.0703031	0.0991577	0.00123402	-0.00401684	0.120632	0.0526806	0.0311282	0.12922	-0.020566	0.156766	0.133782	0.149782	0.171994	0.0743878	0.195559	0.265893	-0.188381	0.0371553	0.0154149	0.144687	0.151557	0.127145	-0.113672	0.020908	0.0628662	-0.157393	0.0590995	-0.0984725	0.131638	0.113857	-0.205471	0.124799
TCGA.GD.A3OP.01	-0.502014	0.0878047	0.183887	0.0722815	0.067761	0.148964	0.149776	0.0937372	0.239155	0.0198265	0.0833732	-0.201383	0.142268	0.165213	0.153178	0.130694	0.0726292	0.11697	0.0589798	0.115385	0.160785	0.0338368	0.157255	0.183393	-0.0159781	-0.10338	0.0898873	0.0786706	-0.0301311	0.077867	0.0526385	0.183365	-0.101789	0.173751	0.15798	0.130568	0.034797	0.0249438	-0.0558963	0.0945089	0.0505576	0.0306404	0.133532	-0.200527	0.0874508
TCGA.GD.A3OQ.01	-0.156431	-0.0702564	0.02625	0.214596	0.0691467	0.069662	0.0195364	0.127242	0.205568	0.0173047	0.213338	-0.375442	0.123908	0.250475	0.199317	0.259243	0.126734	0.0711987	0.0370632	0.21419	0.114926	0.0465432	0.141391	0.270385	0.196594	0.228878	0.213058	0.288794	0.337254	-0.0650086	-0.00432532	0.143709	0.215357	0.173899	0.119581	0.131089	0.113828	0.0886876	-0.0692987	0.0990039	-0.0701927	0.154205	0.0930187	-0.137422	-0.00343179
TCGA.GD.A3OS.01	-0.553748	-0.045782	-0.109685	0.145319	0.00298073	0.139705	0.00947095	-0.0687092	0.0976708	0.0680603	0.146975	0.0412334	0.205599	0.0837768	0.177178	0.0528276	0.0449246	0.0537187	0.0516202	0.0617619	0.0205421	0.0354997	0.373927	0.106155	0.0228189	0.215374	0.0863526	0.185402	0.239078	0.250351	0.235799	-0.0317328	0.000359696	-0.0526362	-0.0318733	0.168008	-0.0344986	0.119581	-0.0574598	-0.125812	0.0130104	0.024186	-0.0281787	-0.0215727	0.217119
TCGA.GD.A6C6.01	-0.244169	-0.00655148	0.0986176	0.204955	-0.000791695	0.106789	0.176236	-0.0272423	0.0561857	0.034753	0.0333671	-0.184062	0.0723248	0.101551	0.158563	0.0521485	0.0330467	0.139299	-0.1708	0.21993	-0.00230379	-0.109713	-0.137447	-0.150562	0.236147	0.307912	0.0445622	0.101048	0.176588	-0.165359	0.0283728	-0.0579629	0.100285	0.073268	0.10041	0.0989344	0.121314	0.11642	-0.0521957	0.0892013	-0.0884237	0.155434	-0.127454	-0.245754	0.0354661
TCGA.GU.A42P.01	-0.439795	0.0325656	0.0731723	0.115673	0.00827533	0.160171	0.0814831	0.104941	0.0597942	0.122085	0.00293377	-0.200066	0.0386167	0.141984	0.00711042	0.0976768	0.010049	-0.013509	-0.112924	-0.10849	-0.1578	-0.0305319	-0.177879	0.0713255	0.132659	0.0549966	0.159016	0.254581	0.315643	-0.184107	0.0195395	-0.00334878	0.0769635	0.116957	0.111519	0.0110276	-0.0636406	0.0946898	-0.0550268	0.0550891	-0.259625	0.0813067	0.116607	-0.148237	-0.0815221
TCGA.GU.A42Q.01	-0.104949	-0.112764	-0.0144211	0.154393	0.0348738	0.0675747	0.0145869	0.0746025	-0.0233281	0.0308197	0.0999134	-0.454182	0.150821	0.200387	0.0866396	0.125977	0.00455663	0.0803393	-0.0422305	-0.0761449	-0.173922	0.0543124	0.024272	0.103915	0.248057	0.331117	0.162364	0.289969	0.379634	0.0915239	0.0465164	0.0607595	0.260772	-0.0191875	0.143814	-0.0135375	0.22288	0.127397	0.0207187	0.0620444	-0.101768	0.185404	0.0375566	-0.0555979	-0.0448059
TCGA.GU.A42R.01	-0.499846	-0.0703865	-0.0707845	0.0561044	0.00957433	0.130941	0.0152357	0.0404303	0.159565	0.0265759	0.0661408	-0.17489	0.0834964	0.158812	-0.0339833	0.0692433	0.0112096	0.0298046	-0.181388	-0.097745	0.0449063	-0.00420327	-0.118776	0.123366	0.10797	0.0337855	0.0938315	0.211196	0.203621	-0.0353058	0.0816809	0.0459886	0.077544	0.138631	0.0977984	0.193096	0.0028638	0.129205	-0.0686853	-0.0129481	-0.169256	0.0657769	0.0950627	-0.207229	-0.0932855
TCGA.GU.A762.01	-0.0906608	-0.0374903	0.0656342	0.140599	0.00760802	-0.0041313	0.0629108	0.0642031	-0.0189122	-0.0311255	0.110426	0.0817341	0.163111	0.129191	0.220729	0.239947	0.211371	0.198956	0.239481	0.339794	0.414362	0.109642	0.283349	0.00541577	0.256734	0.336319	0.119068	0.198021	0.314379	-0.139438	-0.0378956	0.0924555	0.16011	0.0313094	0.0423789	0.114561	0.258216	0.147237	0.249097	0.11502	0.349134	0.16119	-0.046363	-0.0628143	0.0100792
TCGA.GU.A763.01	-0.783499	-0.00625228	0.139927	0.157414	-0.0126074	0.136553	0.17354	0.102151	0.0549553	0.0124248	0.0233109	0.0695965	0.0346464	0.0205922	0.0349252	0.0701582	-0.0221303	0.179605	-0.319071	0.183531	0.0462428	-0.113304	-0.189711	0.0117631	0.334154	0.371265	-0.0268405	0.0688775	0.211269	-0.172497	0.0143512	-0.0588575	0.178902	-0.0260401	0.138224	0.100684	0.221297	0.114933	-0.0375865	0.105871	-0.0988704	0.167598	-0.00636883	-0.27599	-0.00647021
TCGA.GU.A764.01	-0.146686	0.0732457	-0.0133364	0.184687	-0.00383122	0.111153	0.051386	-0.00795325	0.075924	0.0930597	0.102715	0.211627	0.195818	0.00153401	0.120064	0.267229	0.155902	0.165406	0.194387	0.000764108	0.234448	0.0408495	0.341324	0.0465417	0.170557	0.1459	0.0647653	0.120082	0.304736	-0.00299185	0.0819533	0.0899024	0.213522	0.186302	0.0349415	0.187482	0.0737538	0.129672	0.202586	0.00929769	0.236772	0.052867	-0.136005	-0.186679	0.241855
TCGA.GU.A766.01	-0.123162	-0.162124	-0.0480007	0.0660683	-0.0213174	0.0571353	0.0627517	0.0997699	-0.00188578	-0.0206026	0.161018	-0.0059138	0.173415	-0.0733352	0.14745	0.340435	0.171196	0.304392	0.313266	0.466877	0.473561	0.167446	0.177162	-0.0205145	0.253273	0.33638	0.0756545	0.140776	0.264218	-0.218323	-0.00353194	0.0814596	0.269027	-0.123598	0.0774958	0.10703	0.283748	0.136351	-0.0178288	0.0347178	0.328862	0.177669	-0.0593126	-0.0444349	0.144382
TCGA.GU.A767.01	-0.305569	-0.00565707	0.11427	0.0877971	-0.0151967	0.108122	0.155188	0.073752	0.138459	0.0115903	0.00924414	0.212187	0.140961	0.158655	0.0849428	0.132914	0.0646705	0.0783816	-0.111979	-0.111279	-0.00424082	-0.103569	0.0852564	-0.0107809	0.26282	0.188501	0.0215833	0.0558032	0.199598	-0.050974	0.118807	-0.0410672	0.155173	0.170875	0.0519668	0.0919622	0.174947	0.134792	-0.0631556	0.0632793	-0.0822854	0.134894	-0.13348	-0.241239	0.256643
TCGA.GU.AATO.01	-0.127868	0.013015	0.0829358	0.19414	4.68495e-05	0.183267	0.0869491	0.08274	0.137936	0.0160684	0.0954178	-0.125276	0.0860922	0.036929	0.133963	0.180877	0.136812	0.144518	0.0426307	0.0905439	0.133661	0.0292019	0.0521868	-0.027113	0.213999	0.0819756	0.0297306	0.0706547	0.171468	-0.117522	0.0570821	0.0206935	0.152456	0.101687	0.13596	-0.0418163	0.216531	0.0986724	-0.063887	0.0866442	0.155336	0.0806382	0.0576955	-0.13271	0.135513
TCGA.GU.AATP.01	-0.377367	0.0301572	0.000855614	0.105185	-0.0824409	0.134685	0.0909714	0.00391961	0.0659379	0.0615644	0.111786	-0.090429	0.167446	0.10147	0.067441	0.19176	0.115897	0.161094	0.130772	0.321292	0.250975	0.0484439	0.361149	0.0580514	0.0209081	0.044218	0.0444351	0.0154011	0.153451	-0.034347	0.026545	0.0410078	0.124414	0.0975215	0.0702925	0.0909493	0.147357	0.115239	0.0678888	0.0103542	-0.019767	0.0755764	-0.029282	-0.208253	0.149562
TCGA.GU.AATQ.01	-0.247758	-0.142762	0.104364	0.148109	-0.0066625	0.122428	0.071188	0.00511982	0.0576451	-0.00603579	0.0181914	-0.315361	0.122914	0.0683591	0.0926994	0.0867303	0.0126771	0.0568088	-0.0625706	0.0282809	0.073076	-0.0194744	-0.0826854	-0.00290002	0.31551	0.384242	0.0984661	0.290028	0.364411	-0.167622	0.0329849	0.0178146	0.217132	0.00789371	0.186375	0.11799	0.208444	0.13483	0.0366341	0.0722292	-0.0763097	0.154254	-0.00144555	-0.168161	0.0341455
TCGA.GV.A3JV.01	-0.404162	0.0805318	0.098001	0.0467137	0.0351847	0.222258	0.0673788	0.107946	0.130605	0.0153783	0.0521564	-0.0853944	0.0460626	0.124855	0.094518	0.248385	0.140749	0.136349	0.0423494	0.134196	0.181121	0.0306799	0.162264	0.150225	0.152032	0.19224	0.149123	0.167737	0.255279	-0.021232	-0.0279986	0.0450802	0.0300242	0.151976	0.0884935	0.269827	0.153378	0.142943	-0.123428	0.0994982	0.185385	0.145568	0.0898686	-0.152795	0.0878705
TCGA.GV.A3JW.01	-0.90213	-0.0316863	0.0302367	0.0436305	0.0280865	0.163837	0.14457	0.0730335	0.184655	0.0291923	0.0630825	-0.243586	0.0638704	0.134293	0.104152	-0.0984938	-0.00529654	0.0257229	-0.186572	-0.202931	-0.00573079	-0.0243302	-0.206922	0.0894353	0.0963386	0.100581	0.102755	0.230065	0.240329	-0.105357	0.092133	-0.00485913	0.143201	0.118146	0.0461957	0.0405528	0.0520058	0.0417721	-0.0944069	-0.00418546	-0.168047	0.141952	0.0639701	-0.166107	-0.0510933
TCGA.GV.A3JX.01	-0.306051	0.0172947	0.042588	0.14783	0.051116	0.0897058	0.118465	0.155702	0.170244	0.0276765	0.003344	-0.372087	0.120643	0.190797	0.114697	0.113086	0.12773	0.0900208	0.0394162	0.318778	0.29495	0.0804776	-0.0850214	0.0941385	0.0211706	-0.0701806	0.173016	0.223721	0.328528	0.0753268	0.141291	0.0975985	0.0592022	0.0125137	0.135264	0.312027	0.127321	0.0972324	-0.0273263	0.0446562	0.0515826	-0.000616452	0.087891	0.106702	-0.0221334
TCGA.GV.A3JZ.01	-0.346662	-0.026428	0.0894549	0.161037	-0.0406454	0.133603	0.0267361	0.0494441	0.125905	0.054103	-0.0388758	-0.0041514	0.0850726	-0.102901	0.0513638	0.0824036	0.0603605	-0.0484874	-0.0577024	-0.00919235	-0.0943437	-0.00527127	0.124203	0.0331197	0.22698	0.194619	0.158795	0.257423	0.35453	-0.220111	0.00522607	0.0397633	0.281163	0.11797	0.155184	0.161506	-0.0439406	0.0902753	-0.0473394	0.0238672	-0.139813	0.172837	0.06958	-0.058794	0.0172901
TCGA.GV.A3QF.01	-0.67727	0.0925716	0.124406	0.202556	0.0245429	0.082183	0.182778	0.0898813	0.104512	0.0930831	0.0886807	-0.161581	0.04091	0.0953126	0.10743	0.195445	-0.0436945	0.0429175	-0.0757422	0.0223636	-0.0496495	-0.00547262	-0.181088	0.0504663	0.1834	0.218676	0.118266	0.160439	0.28473	-0.0830187	0.00815049	-0.0209892	0.179552	0.0502834	0.107148	0.0195827	0.106834	0.0457138	0.0211877	0.0946718	-0.168474	0.134952	0.0606734	-0.237824	0.00790106
TCGA.GV.A3QH.01	-0.413962	-0.099641	0.0406452	0.0890765	0.0216362	0.206679	0.0622694	0.0593139	0.215028	0.0596955	0.0621422	-0.306643	-0.039839	0.114281	0.0269075	0.118747	0.00496773	0.11793	-0.205168	0.152676	0.143548	-0.0171284	-0.204766	0.11065	0.170497	0.236946	0.208136	0.30148	0.321648	-0.137533	0.0518251	0.0215726	0.112884	0.0257334	0.10068	0.100342	-0.00804087	0.147141	-0.113056	0.0684049	-0.147496	0.152558	0.0475611	-0.221484	-0.0784882
TCGA.GV.A3QI.01	-0.36061	0.0181552	0.0887181	0.152146	0.0590777	0.204342	0.114086	0.0123819	0.184154	0.134364	0.166618	-0.11292	-0.0293093	-0.00770905	-0.0125771	-0.0485188	-0.00733218	0.0785319	-0.0927839	0.0201714	-0.0893714	-0.00203426	-0.0582644	-0.0572606	0.0131205	-0.0219684	0.0843484	0.286843	0.407128	0.00657272	0.0445487	0.0611218	0.055281	-0.0810857	0.0946355	0.0619939	-0.0156138	0.12582	-0.214664	0.0178266	-0.262842	0.0474649	0.0243519	0.147952	-0.0666446
TCGA.GV.A3QK.01	-0.936093	-0.0741693	0.185122	0.122615	0.0227965	0.178652	0.115187	0.081731	0.100732	0.0609264	-0.01784	-0.211267	0.0258885	0.175266	0.0768992	0.153731	0.127902	0.110605	0.0285476	0.266159	0.292562	-0.0420656	-0.341172	0.0419598	0.194585	0.178406	0.0714406	0.183273	0.221711	-0.119103	0.022995	0.0246583	0.145229	0.157654	0.155475	-0.0127589	0.056725	0.0625529	-0.0878893	0.100878	0.191107	0.147341	0.0753122	-0.196883	-0.0326727
TCGA.GV.A40E.01	-0.387543	-0.0774566	-0.00959048	0.176162	-0.0143884	0.0597245	0.0164028	-0.00946619	0.0903666	0.0358128	0.163143	-0.127159	0.191844	0.119457	0.115705	0.251164	0.0767999	0.0341475	0.116355	0.231379	0.2058	0.0550563	0.178281	0.0551587	0.273497	0.372839	0.110249	0.222946	0.332188	-0.160104	0.0200544	0.0504605	0.2691	0.0306948	0.0304317	0.12323	0.0972116	0.0952445	0.0476397	0.0343197	0.0412022	0.162946	-0.0157843	-0.138447	0.00334586
TCGA.GV.A40G.01	-0.764214	-0.0130901	0.138437	0.110012	0.0360307	0.196898	0.093656	0.134495	0.0643778	0.0825468	0.041523	-0.12	-0.00325765	0.162267	0.0961575	0.0961847	-0.0311324	-0.0604581	-0.128168	-0.095155	-0.0847336	-0.00587926	-0.170732	-0.0933319	0.195928	0.222252	0.134081	0.158399	0.325094	-0.1057	0.0137983	-0.0560628	0.134074	0.0625916	0.177432	0.110142	0.0480421	0.1201	-0.153682	0.0225726	-0.137505	0.0432908	0.0577111	-0.0590176	0.0394418
TCGA.GV.A6ZA.01	-0.770958	-0.132252	0.0639411	0.125333	-0.0858798	0.151713	0.105367	0.0926652	0.0340436	0.0156443	-0.0750463	-0.138407	0.0264766	-0.00478251	0.0962461	0.100545	0.0364384	-0.0627359	-0.174596	0.174085	0.153154	-0.0764877	-0.262269	-0.039399	0.287014	0.308258	0.0814837	0.22095	0.366219	-0.16435	-0.0194982	-0.0459894	0.222312	0.0498368	0.141939	0.14579	0.151764	0.0928174	-0.173428	0.0551629	0.112693	0.136514	-0.0866386	-0.250239	-0.0954445
TCGA.H4.A2HO.01	-0.394435	0.0401778	0.165453	0.14582	0.0675924	0.143831	0.186524	0.155115	0.0972911	0.0120735	0.054139	0.131558	0.0349887	0.158713	0.0610374	0.0398988	0.0991917	0.0956259	0.0635945	0.180843	0.0855535	0.0292817	-0.0585991	0.0412151	0.172652	-0.102841	0.00453245	-0.0557642	-0.0693224	-0.0409221	-0.0110171	0.0863151	0.0668729	0.283838	0.16574	0.111875	0.0475262	-0.00675453	0.0894652	0.171392	0.0895142	0.0675201	0.156995	-0.0619443	0.0396269
TCGA.H4.A2HQ.01	-0.412577	-0.16659	-0.0373916	0.103595	0.00925314	0.16753	0.01249	0.077778	0.109587	0.100094	0.00366491	-0.372331	0.0760888	-0.0866589	0.0409007	0.0989741	-0.0312375	0.0771546	-0.271932	0.186597	0.14571	0.0387299	-0.158117	0.142003	0.148794	0.135624	0.135237	0.295891	0.287482	-0.238724	0.0426536	0.0608119	0.106349	0.101141	0.135296	0.176834	0.0528237	0.0507216	-0.0456525	0.00785258	-0.152361	0.102359	0.0796704	-0.227338	-0.0864905
TCGA.HQ.A2OE.01	-0.488779	0.0101883	0.0535673	0.107968	0.0539147	0.175563	0.131097	0.0733481	0.0909747	0.0488674	0.147645	-0.0707487	-0.0241213	0.0791047	0.069266	0.111056	0.0159706	0.0309283	-0.0611466	-0.0431373	-0.0547307	-0.0466556	-0.281047	0.14374	0.216236	0.275036	0.188696	0.283329	0.341563	-0.0425938	0.0364295	-0.0294025	0.163287	-0.00718794	0.180295	0.221721	0.00515267	0.0670748	-0.104687	0.103096	-0.105241	0.193018	0.0709599	-0.215094	-0.0666748
TCGA.HQ.A2OF.01	-0.188451	0.0756247	0.181269	0.14821	0.0448246	0.0463278	0.141629	0.103188	0.125003	0.0803092	0.000460045	-0.209571	0.0744402	0.187209	0.0783905	-0.057912	-0.0152618	0.0571941	-0.151575	-0.116631	-0.157313	0.0446733	-0.0998526	0.0159891	0.166026	0.127774	0.138493	0.276317	0.306234	-0.0685754	0.0854486	0.0853399	0.163698	0.183746	0.175112	0.0930623	-0.0752545	0.0966462	0.0917166	0.121872	-0.153943	0.131509	0.148882	-0.0620355	-0.103922
TCGA.HQ.A5ND.01	-0.077446	-0.0476342	0.0440856	0.215168	0.0059668	0.129384	-0.00637962	0.095312	-0.0172922	0.0387646	0.0189452	-0.218068	0.137051	0.00336458	0.227822	0.0838368	0.101494	0.124574	-0.134691	0.213787	0.076413	0.0406733	-0.0680419	0.0669707	0.311429	0.256267	0.12752	0.321863	0.454441	-0.113968	-0.00237779	0.0939971	0.309162	0.0293974	0.169233	0.0870912	0.110935	0.0497746	-0.0547564	0.101345	-0.0540156	0.19035	0.0847915	-0.202567	0.0871604
TCGA.HQ.A5NE.01	-0.121278	-0.105481	0.0180169	0.199482	0.0646364	0.0815284	0.0252904	0.12823	0.144864	0.0593628	0.202214	-0.0868047	0.170639	0.203123	0.0664674	0.354793	0.139747	0.0439501	0.175829	0.296278	0.0913766	0.041373	0.187898	0.0514734	0.12117	0.152221	0.165078	0.240768	0.302497	0.0361744	0.0665505	0.191468	0.204463	0.133345	0.153706	0.0417487	0.127878	0.136268	0.066917	0.0549955	-0.0100282	0.124903	0.0924585	-0.136507	0.0294705
TCGA.K4.A3WS.01	-0.368917	0.0378654	-0.00427279	0.0354082	-0.0765597	0.0708886	0.0811451	0.0658719	0.0392394	-0.0340326	0.128955	0.261622	0.203177	0.211196	0.156671	0.170979	0.223271	0.197427	0.180644	0.119959	0.30935	0.110234	0.428604	0.0557518	-0.0133964	0.0668014	0.0362533	0.0995664	0.147404	0.0650686	0.0646574	0.145005	0.0344432	0.20638	0.0266328	0.151126	0.13535	0.0466419	-0.0219148	0.0323405	0.188284	0.0224724	-0.0772339	-0.136167	0.206016
TCGA.K4.A3WU.01	-0.875806	0.153358	0.0197191	-0.0132874	-0.0387496	0.0564267	0.121621	0.191867	0.167203	0.0279938	0.140014	0.168117	0.177212	0.290293	0.0996222	0.190148	0.206076	0.185805	0.230818	0.0168949	0.203838	0.114384	0.232463	-0.0141905	-0.150725	-0.219368	-0.0264028	-0.0856295	-0.037663	-0.151339	0.169218	0.152517	-0.0852368	0.129628	0.0331401	0.235143	-0.0164063	-0.0276948	0.0415102	-0.00405019	0.24717	0.0047413	0.0145401	-0.0882978	0.254831
TCGA.K4.A3WV.01	-0.30713	0.00677552	-0.00764951	0.279044	-0.0463702	0.0431463	0.149936	0.00401267	0.0934593	0.0756716	0.146442	-0.0125853	0.158828	-0.0121961	0.0595108	0.0714669	-0.0110443	-0.0486999	0.0238366	0.147548	-0.0572522	0.0117365	0.00305605	-0.0563147	0.0490308	0.127082	0.102276	0.218132	0.248266	0.00845413	0.0601391	-0.00863516	0.119807	0.0674877	0.143618	0.0654835	-0.0238536	0.0838886	-0.0457589	-0.0342496	-0.121263	0.132179	-0.0305978	-0.00942052	0.0203034
TCGA.K4.A4AB.01	-0.133125	0.058325	-0.0172914	0.209605	0.046657	0.0718176	0.069812	0.156365	0.19081	-0.00246655	0.197038	-0.189301	0.193873	0.195745	0.183019	0.374968	0.136616	0.20215	0.0883306	0.169168	0.0193751	0.0485129	0.292736	0.170738	0.0473004	0.0943169	0.095709	-0.0579365	-0.212391	-0.00365115	0.0775748	0.127689	0.0128021	0.208069	0.158863	0.169333	0.19391	-0.00600179	0.069565	0.0744941	-0.0707363	0.100659	0.112283	-0.0659629	0.15652
TCGA.K4.A4AC.01	-0.0596512	-0.0569052	-0.0037024	0.155452	0.0261516	0.0890391	0.055962	-0.0226061	0.0446155	0.0283761	0.0398573	-0.202809	0.124399	0.117186	0.157205	0.190101	0.145048	0.0162532	0.0201598	0.218176	0.227544	0.0234028	0.103623	0.0761426	0.326641	0.431837	0.139393	0.301985	0.366561	-0.259863	-0.0269902	0.0109421	0.29034	-0.135477	0.130671	0.137511	0.248983	0.138976	-0.0550002	0.0782087	0.0863205	0.162527	0.0495135	-0.189475	-0.00563589
TCGA.K4.A54R.01	-0.204456	-0.0408011	0.0640697	0.137091	0.00251807	0.131071	0.132874	0.0577606	0.00587071	0.0703002	0.176855	-0.321672	0.141406	0.181772	0.17631	0.217555	0.186119	-0.0169628	0.0727305	0.297187	0.376892	0.0629316	0.261508	0.00679577	0.270993	0.20805	0.109982	0.232857	0.30462	-0.254627	-0.0239722	0.0390399	0.185988	0.0358679	0.0860555	0.0388473	0.0909618	0.121881	-0.0804095	0.0343657	0.263417	0.180338	0.0598903	-0.203516	0.135233
TCGA.K4.A5RH.01	-0.204603	-0.123534	-0.0668423	0.0382776	0.0316674	7.69336e-05	-0.0181519	0.122077	0.00467574	0.048279	0.143756	0.03989	0.153478	-0.023695	0.252356	0.242503	0.265956	0.245927	0.333066	0.276803	0.405582	0.159765	0.394812	0.18966	0.143074	0.158225	0.196731	0.216227	0.320752	-0.0369044	-0.0694152	0.155058	0.210066	-0.0443454	0.034013	0.207928	0.263705	0.117599	-0.09808	-0.0788365	0.383037	0.121741	0.060021	-0.0353897	0.0879444
TCGA.K4.A5RI.01	-0.211537	0.0202128	0.100793	0.183822	0.0206504	0.207021	0.116883	0.0667213	0.0602627	0.00977848	0.10193	-0.185027	0.133775	0.111536	0.0992063	0.114226	0.0872646	0.128781	-0.095585	0.142619	0.0238545	0.0730185	0.130585	0.087217	0.283279	0.319645	0.110688	0.261645	0.375845	-0.108669	0.00286681	0.0977827	0.201596	0.130706	0.204243	0.118801	0.209004	0.0512277	0.129132	0.126344	-0.0229832	0.112889	0.0824991	-0.20555	0.0574929
TCGA.K4.A5RJ.01	-0.351333	0.0642639	0.12645	0.062614	0.0249701	0.0136271	0.0991632	0.115148	-0.00259709	0.0530249	0.0716092	0.058873	0.0424715	0.0328702	0.118754	0.0233404	0.16078	0.267445	0.264692	0.348607	0.40101	0.181249	0.107071	-0.0749786	0.153926	0.105586	0.0300387	0.202759	0.333924	-0.0258338	-0.0314755	0.104377	0.180392	0.0987442	0.0601587	0.100246	0.308872	0.126133	-0.0983746	0.269693	0.374814	0.0182839	0.0774593	-0.0152613	-0.0258673
TCGA.K4.A6FZ.01	-0.158642	-0.0595841	0.0323436	0.184196	0.0598779	0.0705985	0.100636	0.233884	0.204589	0.0128038	0.151178	-0.0511211	0.113402	0.185065	0.204867	0.366909	0.18578	0.136242	0.232919	0.366719	0.253437	0.110049	0.0341321	0.0845671	0.129133	0.17777	0.16438	0.218809	0.239096	-0.00387445	0.0810526	0.143998	0.18479	0.0891505	0.142521	0.0560885	0.174534	0.108959	0.0529654	0.0899536	0.13114	0.114439	0.159676	-0.173701	-0.0519441
TCGA.K4.A6MB.01	-0.711892	-0.0426762	-0.0113176	0.169922	-0.0093629	0.152735	0.100506	0.0933329	0.140876	0.053406	0.020219	-0.0709504	0.187042	0.241786	0.115009	0.146716	0.0349195	0.0427602	-0.0768136	-0.213758	-0.0678126	-0.0114686	0.186504	-0.0137421	0.0854863	0.0741526	0.0903023	0.172495	0.272179	-0.0424563	0.101031	0.0334096	0.131052	0.219713	0.10869	0.233487	-0.0245035	0.0878919	-0.0906754	0.0517605	-0.131698	0.162649	-0.0162678	-0.237215	0.0803151
TCGA.K4.A83P.01	-0.329261	0.0278572	0.021416	0.0508339	0.0102112	0.161768	0.065291	0.136459	0.156765	0.0255894	0.119589	0.204885	0.191897	0.247157	0.183721	0.409684	0.227248	0.21118	0.295686	0.106753	0.329349	0.143231	0.345588	-0.0548993	0.0651702	-0.0132204	0.0457288	0.0214357	0.0120962	0.0764227	0.11699	0.182811	0.0240495	0.182249	0.051313	0.103345	0.199575	0.0586186	-0.0879769	0.0392276	0.357033	0.0302253	-0.126951	-0.091373	0.244524
TCGA.K4.AAQO.01	-0.360598	0.135987	0.116158	-0.0578552	0.0197727	0.0885761	0.107221	0.116419	0.112628	0.0230063	0.0328183	0.235045	0.191935	0.189338	0.110629	0.140497	0.14097	0.0334892	0.0513005	-0.0198659	0.121443	0.0718411	0.242614	0.0309032	0.137288	0.0907222	0.0784705	0.157054	0.121808	0.0621933	0.123593	0.164935	-0.0787127	0.185686	0.130499	0.170952	0.0166998	0.00603608	0.0605909	0.08658	0.126738	0.0795992	0.0106525	-0.0798661	0.257316
TCGA.KQ.A41N.01	-3.30802	0.0566637	0.0527097	0.152269	-0.0299925	0.177462	0.112737	-0.0244725	0.0426562	0.0800672	-0.024812	-0.111094	0.125332	0.0702194	0.0082281	0.017005	0.0520456	-0.0671656	-0.159644	-0.0255221	-0.0441442	-0.121029	-0.0376709	0.0492984	0.186937	0.215824	0.0461673	0.112797	0.18454	-0.130914	0.0517679	-0.0788434	0.110802	0.0406621	0.11121	0.0606616	0.196461	0.0359342	0.0411744	0.0507308	-0.131763	0.0853889	-0.0828825	-0.190948	0.174923
TCGA.KQ.A41O.01	-1.19099	-0.017171	0.0858638	0.0771923	-0.037828	0.135367	0.0848301	0.09517	0.0164332	0.0720105	-0.00372156	-0.251169	0.0039915	0.0832647	0.0743333	0.00489362	-0.0195661	-0.00609436	-0.263544	0.00627186	-0.058169	-0.101318	-0.210262	0.0724013	0.213848	0.219124	0.0666301	0.220837	0.28297	-0.30004	0.0457873	0.00131768	0.0304695	-0.0890822	0.107516	0.0914315	0.142716	0.0320822	-0.0489577	-0.0130671	-0.0912196	0.117193	0.00543103	-0.241929	0.0157135
TCGA.KQ.A41P.01	-0.341714	-0.112978	0.132705	0.136924	0.000300387	0.237317	0.0959343	0.0504614	0.166799	-0.0271411	0.0708891	-0.0804409	0.12813	0.285128	0.126657	0.167308	0.029477	0.0837109	0.0206466	-0.120536	0.0583526	0.0317459	0.138648	0.0671733	0.118649	0.20356	0.0238868	0.0570476	0.150468	-0.181244	0.0907332	0.0721375	0.0288434	0.17137	0.0951225	0.0277126	0.170572	0.114109	-0.0301906	0.0532309	-0.0273107	0.0559284	-0.0595655	-0.257639	0.161131
TCGA.KQ.A41Q.01	-1.1116	0.0399299	0.10586	0.176205	-0.0102935	0.200805	0.172872	0.0933883	0.0620071	0.099256	0.0462197	-0.1723	0.000212333	0.070648	0.134339	0.120057	-0.0549318	-0.0813174	-0.132823	-0.0116833	-0.0482393	-0.0121628	-0.116944	-0.0902533	0.222029	0.190085	0.150278	0.216436	0.360972	-0.302131	0.0217697	0.0186956	0.175884	0.13423	0.104847	0.0921571	0.0467324	0.0678536	0.0140168	0.0331115	-0.0974951	0.148788	0.0523279	-0.150731	0.00108013
TCGA.KQ.A41R.01	-0.765967	0.115667	0.110768	0.0656082	-0.0128938	0.212453	0.193322	-0.0334104	0.00420657	0.0720952	0.0278549	0.0940668	0.0823074	0.174954	0.0258513	0.0706956	0.0516336	0.121442	-0.112234	0.168768	0.0762703	-0.0672366	-0.230262	-0.00538884	0.143689	0.128324	0.042899	0.0879506	0.120599	-0.170902	0.0442372	-0.0732471	0.111929	0.0638351	0.106819	-0.0288617	0.0909818	0.0379669	0.197435	0.0777225	-0.10834	0.106907	-0.0381353	-0.224424	0.0581479
TCGA.KQ.A41S.01	-0.202478	0.0778107	0.059787	0.152573	0.0281417	0.133768	0.126841	0.101197	0.139185	0.00907573	0.059722	0.0829566	0.149919	0.0952555	0.0537768	0.289165	0.0575844	0.165642	0.127679	0.144466	0.11932	0.029155	0.27662	0.11957	0.00536872	-0.0798806	0.14041	0.147344	0.232035	0.0425346	0.00940499	0.16064	0.0564746	0.21112	0.0404753	0.151142	0.177791	0.173255	-0.0426574	0.0965859	-0.0602961	0.108042	0.056222	-0.134938	0.0938584
TCGA.LC.A66R.01	-0.10076	-0.0482951	0.0231582	0.0967008	0.0516321	0.0850891	-0.0132635	0.064919	0.0797693	0.0670912	0.17274	-0.0961433	0.149838	0.122698	0.0814014	0.272306	0.183239	0.139992	0.275475	0.235016	0.316171	0.038996	0.17345	0.05784	0.219985	0.262706	0.167941	0.253329	0.405595	-0.101029	0.0339151	0.154905	0.235032	0.0623872	0.0328441	0.179587	0.0971499	0.173568	-0.0648622	-0.0102052	0.275084	0.182225	-0.00445669	-0.213122	0.0685483
TCGA.LT.A5Z6.01	-1.34166	0.0294007	0.0187858	0.0755292	0.0718561	0.164603	0.145731	0.11449	0.162117	0.0879288	0.0990159	-0.300733	0.00964906	0.0650671	0.00638054	-0.0811772	-0.0111417	0.100336	-0.0381748	-0.126323	0.0265933	0.0209385	-0.324869	-0.107731	0.00405227	-0.0117952	0.0866194	0.268499	0.344351	-0.199855	0.0778161	-0.0347126	0.0486876	0.00456062	0.09403	0.0771307	-0.0451405	0.121911	-0.0816744	0.0273439	-0.00101231	0.0229158	-0.0124818	-0.173657	-0.0244192
TCGA.LT.A8JT.01	-0.983316	-0.0554661	0.0347689	0.12701	0.00173619	0.167361	0.101355	0.116179	0.22596	-0.0106832	0.0435194	-0.280692	0.0711041	0.117151	0.0762874	0.097412	0.0549175	0.111692	-0.225571	0.125836	0.0489263	0.00948099	-0.293062	0.122643	0.223931	0.216926	0.0942539	0.0697789	0.036696	-0.150111	-0.0242505	0.054197	0.0561533	0.17294	0.110392	0.161661	-0.00230621	0.048998	-0.0203187	0.0594073	0.0119385	0.169781	0.0903175	-0.311521	-0.0512098
TCGA.MV.A51V.01	-0.365894	0.0401801	0.142798	0.198939	0.00903221	0.171604	0.209916	0.130864	0.130994	0.130788	0.0749562	0.115109	0.111695	0.192257	0.0456656	0.284069	0.0487723	0.110551	0.0499349	-0.000558208	-0.00505792	-0.0432986	-0.0501142	-0.0466905	0.0588759	0.043798	0.105613	0.0598744	0.162235	-0.256146	0.0404795	0.05421	0.0867455	0.0253233	0.124454	-0.0499698	0.0714658	0.0942563	-0.00950403	0.0881943	-0.255684	0.0134672	0.0295151	-0.248346	0.0383578
TCGA.PQ.A6FI.01	-0.071343	-0.147528	-0.0303545	0.136301	-0.015828	0.0565564	-0.011845	0.0742311	0.0090579	0.0109885	0.067231	-0.146722	0.155878	0.072545	0.106965	0.227225	0.0685093	0.0686299	0.0216932	0.338097	0.182641	0.0462558	0.0717878	-0.016859	0.36624	0.48585	0.17721	0.333357	0.419972	-0.306327	-0.0357853	-0.00283804	0.268698	-0.0861761	0.122795	0.0280235	0.154606	0.195708	-0.0779321	0.0389914	0.0116153	0.234234	0.0550068	-0.168514	-0.0615371
TCGA.PQ.A6FN.01	-0.0595247	-0.12213	0.0218472	0.194343	0.013384	0.153073	0.021204	-0.021844	0.015429	0.0143685	0.103802	0.113895	0.164728	0.079336	0.180696	0.162194	0.104278	0.0421509	0.0884063	0.0324868	-0.0572901	0.0162812	0.176262	-0.0446904	0.385013	0.448098	0.0126367	0.182405	0.283113	-0.251456	0.0565516	-0.00711005	0.291557	0.120829	0.0965705	0.0609187	0.214244	0.157789	0.0344135	0.0835069	0.0604738	0.180226	-0.0137768	-0.273656	0.0644043
TCGA.R3.A69X.01	-0.240838	-0.0167098	0.0435376	0.235113	0.000316927	0.0666177	0.0773416	0.116702	0.200338	-0.00147079	0.109402	0.029832	0.212061	0.172	0.163431	0.164115	0.181795	0.278038	0.248203	0.0195974	0.218936	0.168905	0.274893	0.0140048	-0.0136114	0.102982	0.111377	0.154446	0.191205	0.093533	0.066449	0.227577	0.156859	0.204445	0.155161	0.0147744	0.167676	0.118721	-0.0268235	0.175953	0.21733	0.0835857	0.136893	-0.228635	0.140618
TCGA.S5.A6DX.01	-0.192264	0.116538	0.1363	0.108811	0.00865381	0.108741	0.135005	0.0125889	0.0563611	0.0578656	0.0465955	0.0170111	0.112716	0.0730579	0.157882	0.115487	0.095614	0.1483	0.135775	0.0903695	0.201473	0.0627346	0.124132	-0.139426	0.16545	0.238869	-0.0460662	0.0141024	0.0718591	-0.0790163	0.100255	0.0356523	0.0902845	0.144181	0.0717661	0.0508381	0.250961	0.0802427	0.00831041	0.0626764	0.232438	0.100324	-0.169392	-0.154887	0.221678
TCGA.S5.AA26.01	-2.393	0.0112185	0.095439	0.0714436	0.00772857	0.13356	0.149732	0.0293647	0.0508961	0.0574015	0.0596155	-0.0783293	0.0706975	0.0290137	0.0609841	0.014298	-0.00312395	0.0915733	-0.260178	0.00992274	-0.0854389	-0.0929171	-0.170169	0.0559021	0.101251	0.138148	0.0852874	0.198758	0.263161	-0.115327	0.0779889	0.0226241	0.0576308	-0.0120098	0.102062	0.0612873	0.11444	-0.00937391	0.0913919	-0.0161341	-0.155982	0.0398558	-0.0339347	-0.181856	0.0013306
TCGA.SY.A9G0.01	-0.458303	0.0779806	0.0906695	0.0336873	-0.0486623	0.127252	0.112436	0.0434466	0.145257	-0.139258	0.159753	0.356811	0.245967	0.209966	0.154158	0.307905	0.217411	0.273467	0.172034	-0.0504434	0.127374	0.0809891	0.42584	0.169539	-0.0295736	0.0835874	0.0861347	-0.0441131	-0.119904	0.209897	0.0769659	0.197856	-0.0505938	0.263111	0.0404116	0.144842	0.0343285	0.107413	0.192495	0.125729	0.0947339	0.052369	-0.0689684	-0.0483582	0.275614
TCGA.SY.A9G5.01	-0.483849	-0.0518564	-0.0772969	0.126892	-0.0082163	0.136194	0.0612637	-8.17793e-05	0.00955479	-0.0052834	0.119572	-0.130135	0.175663	0.174885	0.14409	0.322516	0.147128	0.115524	0.192003	0.334859	0.403938	0.0872462	0.288683	0.0865506	0.0919323	0.0994945	0.100035	0.107131	0.232956	-0.250737	0.0572673	0.0734307	0.080794	0.157638	0.0994903	0.157558	0.11684	0.046876	0.0435813	0.0420476	0.261637	0.0781367	-0.0660005	-0.13212	0.134823
TCGA.UY.A78K.01	-0.442568	-0.0856585	0.0970421	0.0769314	0.0345164	0.193525	0.105465	0.0889738	0.185008	0.110248	-0.0185393	-0.00459749	0.0376993	0.135391	0.0624368	0.0567888	0.16894	0.0835262	0.0202042	0.11369	0.358961	0.140043	-0.0439056	-0.125143	0.196646	0.074509	0.140288	0.208244	0.328524	-0.159535	-0.0196665	0.0475216	0.149215	0.125478	0.0945514	0.00144566	0.23331	0.0461678	0.00679278	0.116958	0.317697	0.0717053	0.0164324	-0.142527	-0.0110133
TCGA.UY.A78L.01	-0.132232	-0.0798098	0.0310883	0.21269	0.0460328	0.125472	0.0439889	0.100007	0.193596	0.0210814	0.140857	-0.00314633	0.142988	0.0315865	0.0867446	0.215772	0.0415467	0.0424994	0.0744806	-0.131669	-0.0946576	0.0159699	0.229493	0.100895	0.296449	0.263019	0.138917	0.255807	0.340769	-0.0117578	-0.0138284	0.0503154	0.230584	0.174844	0.113178	0.0607549	0.230652	0.117501	-0.0154722	0.0996175	-0.0215723	0.200854	0.137019	-0.148985	0.0378957
TCGA.UY.A78M.01	-0.361633	-0.0836247	0.0724115	0.214775	-0.0540974	0.198385	0.112068	0.0803834	0.0709345	-0.00267576	0.12183	-0.125308	0.122831	0.098746	0.0903088	0.155072	-0.0182647	0.0439982	-0.113525	-0.27458	-0.147971	-0.0654313	0.22071	-0.0129567	0.285466	0.33932	0.0259881	0.123876	0.239851	-0.17023	-0.00428758	-0.0313887	0.212336	0.164753	0.102537	0.0959287	0.137777	0.142587	-0.0689307	0.0837445	-0.0854885	0.208082	-0.0506277	-0.100984	0.11844
TCGA.UY.A78N.01	-0.963486	0.0763674	0.0865012	0.0749764	-0.018328	0.220229	0.0757371	-0.00250833	0.0324184	0.0531564	-0.0186123	0.0532447	0.0781542	0.0849676	0.0736989	-0.124802	-0.0875079	-0.064137	-0.253054	-0.0944859	-0.221834	-0.10701	0.0070752	-0.0893396	0.279139	0.179932	0.123535	0.285685	0.377387	-0.0202003	0.00937442	-0.0527598	0.153573	0.0437716	0.150271	0.229337	0.0694942	0.110668	0.0904495	0.0209159	-0.133278	0.142307	-0.109432	-0.274185	0.0859149
TCGA.UY.A78O.01	-0.489023	0.0996181	0.073821	0.135893	-0.00422489	0.256781	0.195367	0.0857006	0.106701	-0.00310455	0.0726673	-0.0383642	0.0639301	0.0741178	0.1303	0.0796904	0.0383507	0.00426196	-0.0732486	-0.0651757	-0.0458063	-0.0617366	-0.0450882	0.0886376	0.259409	0.19624	0.0305547	0.143155	0.238425	-0.0926255	0.0647655	-0.0211321	0.0921117	0.0470556	0.12189	0.162497	0.152483	0.0576038	0.15587	0.086218	-0.098778	0.117733	0.0197144	-0.211944	0.0990079
TCGA.UY.A78P.01	-0.128201	-0.0683488	0.113835	0.168968	0.0161533	0.126059	0.0439883	0.102403	0.0412771	0.040153	0.057593	0.241725	0.168025	0.100397	0.163371	0.27621	0.193512	0.150344	0.298392	0.347506	0.381899	0.188784	0.113495	-0.00351041	0.316328	0.344508	0.0104104	0.179733	0.301172	-0.17074	-0.00287912	0.160667	0.301269	0.0799486	0.126116	0.0479812	0.240125	0.106724	0.119064	0.0544712	0.337389	0.145183	0.0342992	-0.0138394	0.00225414
TCGA.UY.A8OB.01	-0.0524019	-0.0451714	-0.0273352	0.182975	0.0479606	0.161843	0.0435378	0.0324216	0.0892384	-0.0263896	0.151005	-0.0253508	0.134025	0.202389	0.112899	0.15066	0.0726682	-0.00675675	0.00909721	0.231311	0.185017	0.0221971	0.0599967	0.0513258	0.361646	0.371352	0.0988094	0.25329	0.364902	-0.196856	0.0236436	-0.0315437	0.273502	-0.0309075	0.104074	0.0939397	0.160012	0.146213	-0.0239745	0.0817931	0.113279	0.211544	0.0592908	-0.1838	0.0351089
TCGA.UY.A8OC.01	-0.0902393	-0.125589	-0.00220041	0.207403	0.0203061	0.131057	0.016043	0.0159991	0.053204	0.011321	0.152618	0.0902512	0.22681	0.0263754	0.17409	0.281032	0.163413	0.197743	0.0968704	-0.0647387	-0.173374	-0.017836	0.419642	0.241581	0.268806	0.261463	0.118146	0.127703	0.222362	0.0232799	-0.0298619	0.148903	0.222444	0.31061	0.164663	-0.0541661	0.141662	0.104332	0.0227289	0.0565367	0.0144017	0.203457	0.0944771	-0.11023	0.125537
TCGA.UY.A8OD.01	-0.904314	0.0742971	0.142337	0.125971	0.0188108	0.152259	0.0860105	0.0181742	0.011138	0.0385746	0.0559814	0.148494	0.148397	0.244005	0.145988	0.134478	0.184604	0.0886658	0.144518	-0.162292	0.0365889	0.0327826	0.343404	0.11163	0.123433	0.0928491	0.0302665	0.0710024	0.054298	-0.00358742	0.0807834	0.13813	0.0506402	0.125717	0.0731871	-0.00443539	0.057034	0.0225143	0.0516654	0.113854	0.198662	0.0206238	-0.0605363	-0.19021	0.235889
TCGA.UY.A9PA.01	-0.336638	0.0143216	0.024369	0.184438	0.0688696	0.0678206	0.0571037	0.125092	0.238216	-0.00751553	0.152411	-0.113192	0.062379	0.177225	0.169707	0.373828	0.152603	-0.00878228	0.00596128	0.519587	0.381009	0.0676618	-0.0658508	0.173337	0.117802	0.0761838	0.153611	0.149066	0.0657684	0.00661695	0.0569495	0.0953322	0.0375646	0.112119	0.134556	0.0807464	0.134429	0.0604623	0.00674376	0.104195	0.125131	0.0928759	0.17423	-0.243868	-0.0449223
TCGA.UY.A9PB.01	-0.201517	-0.0378143	-0.0892501	0.122836	-0.0173706	0.0759616	0.0145933	0.0026062	0.0580714	-0.0498193	0.170506	0.00478958	0.146293	0.0986243	0.18074	0.296689	0.199325	0.12199	0.283167	0.300678	0.357918	0.167613	0.377248	0.134591	0.206047	0.250537	0.129281	0.133525	0.290158	-0.20943	-0.0140741	0.123375	0.15882	0.120234	0.0973967	0.112812	0.183113	0.13377	0.157777	-0.0118186	0.362493	0.114618	-0.00701921	-0.297591	0.0991301
TCGA.UY.A9PD.01	-0.505809	-0.0401753	0.105262	0.135949	-0.0707554	0.109087	0.0982192	0.00814601	0.0260946	0.0877364	0.0638597	-0.00140674	0.113707	0.0885485	0.00517957	0.10135	0.0283811	-0.0567266	-0.0621055	0.0314113	0.00451701	-0.120187	0.203243	0.0566814	0.281348	0.268124	0.0626811	0.153508	0.268577	-0.262146	-0.00487765	-0.0363631	0.198014	0.243839	0.0788443	0.0973433	0.161197	0.0617267	-0.088643	0.0148698	-0.0201439	0.196869	0.0373907	-0.290915	0.151475
TCGA.UY.A9PE.01	-0.426086	0.19117	0.129513	0.166318	-0.00745224	0.187092	0.223288	0.101884	0.0365326	0.0086205	0.0742208	-0.0217419	0.0731831	0.139716	0.0349071	0.0427273	0.0400819	-0.0836815	-0.127619	-0.00589242	-0.0119739	-0.0277875	0.127921	-0.0139832	0.272566	0.222547	0.0160369	0.149928	0.261151	-0.269675	0.0331689	-0.0404849	0.223637	0.0915252	0.0207713	0.132973	0.10797	0.0135028	0.310399	0.00959323	-0.0789961	0.158978	-0.013765	-0.131304	0.110572
TCGA.UY.A9PF.01	-0.156498	0.0485349	0.0231729	0.164758	0.00967522	0.130539	0.112365	0.109814	0.148829	0.0144569	0.0594743	0.00420574	0.128466	0.127824	0.0737959	0.3548	0.16111	0.109353	0.0832913	0.126514	0.12332	0.0486112	0.0316541	0.068157	0.143505	0.203719	0.0552978	0.00285134	0.0598664	-0.010716	0.00508412	0.0567818	0.107016	0.215802	0.180625	0.150399	-0.00852996	0.0660853	0.00171058	0.114009	0.0433412	0.123173	0.119238	-0.218259	0.0326812
TCGA.UY.A9PH.01	-0.470805	-0.0523971	0.0631021	0.151529	-0.0260779	0.139106	0.166421	0.0656171	0.0586402	0.0495456	0.0621397	0.0962764	0.0528258	0.0973518	0.12028	0.264638	0.121943	0.166775	0.18671	0.306888	0.421474	0.114956	0.0349057	-0.0398607	0.141953	0.172473	0.0258187	0.0717626	0.264339	-0.298064	-0.00780186	0.0597547	0.148792	0.141128	0.0811687	-0.00722744	0.179156	0.0719583	0.0310671	0.0250818	0.336641	0.115035	-0.053366	-0.221441	0.0384482
TCGA.XF.A8HB.01	-0.200974	-0.0643013	0.134795	0.212091	0.0412094	0.233486	0.151533	-0.0405008	0.196955	0.0894425	0.0771533	-0.0333265	0.0775853	0.180369	0.0806885	0.0893008	-0.063204	0.0352334	-0.17233	-0.0440784	-0.0115855	-0.0299493	-0.230215	0.0647481	0.277834	0.184355	0.0804763	0.245008	0.419922	-0.103213	0.0529659	-0.0236199	0.148108	0.0108679	0.15406	0.134265	0.191539	0.120413	0.131346	0.139514	-0.114103	0.11388	0.046399	-0.106665	0.0947905
TCGA.XF.A8HC.01	-0.498514	0.0508602	0.140124	0.0780376	0.0249996	0.0831999	0.173881	-0.0339113	0.0571495	0.109453	0.0376787	-0.272025	-0.0203273	0.150275	0.10017	0.0164515	-0.018575	0.0719964	-0.16798	0.127251	-0.0398759	-0.0898499	-0.235658	0.0476502	0.20489	0.0761895	0.0831511	0.180671	0.326136	-0.0695305	0.00873649	-0.0720256	0.0432163	-0.0602653	0.107593	0.0622892	0.0933088	0.102619	-0.119845	0.0414378	-0.165761	0.0518103	0.0198112	-0.142553	-0.0229403
TCGA.XF.A8HD.01	-0.246989	-0.0634647	0.0468449	0.187259	0.0329655	0.105212	0.046296	0.0793606	0.0569249	0.00179739	0.132587	-0.246934	0.13094	0.0178058	0.143655	0.223949	0.135541	0.162574	0.128901	0.302316	0.424598	0.0205475	0.120784	0.149063	0.127738	0.122741	0.155327	0.204726	0.310316	-0.214988	-0.0789942	0.0588668	0.170258	0.134615	0.101674	0.0816705	0.147334	0.131182	-0.0629325	0.0445346	0.26492	0.0840767	0.0840673	-0.349935	0.0457066
TCGA.XF.A8HE.01	-0.200797	-0.149362	-0.0114311	0.105973	0.00982474	0.0817485	0.0134506	0.0613236	-0.0285051	0.0231745	0.0065504	-0.079735	0.161265	-0.00308948	0.0568404	0.229433	0.141964	0.139819	0.1928	0.389684	0.303605	0.1402	0.0356793	0.0481418	0.266207	0.384377	0.110472	0.331863	0.402084	-0.288241	-0.0108647	0.119015	0.27958	-0.025479	0.115437	-0.0728248	0.0830416	0.094524	0.100227	0.111446	0.243737	0.187217	0.0454986	-0.193959	-0.127419
TCGA.XF.A8HF.01	-0.163667	-0.0146798	0.14454	0.169738	-0.0548374	0.194852	0.142098	0.00785788	0.0436226	0.0347009	-0.017445	0.0321687	0.0673713	-0.0444944	0.0942475	0.102575	0.0386794	-0.0347459	-0.106474	0.0279349	-0.0155686	-0.0318134	0.137841	-0.0116369	0.199234	0.140752	0.000535162	0.135416	0.237017	-0.175089	0.057533	0.00547846	0.139537	0.187091	0.0635617	0.0401388	0.277452	0.0950389	0.0461991	0.0958072	-0.0143991	0.15411	0.0349468	-0.25127	0.141614
TCGA.XF.A8HG.01	-0.338143	-0.049031	0.137181	0.143053	0.0147221	0.187912	0.15884	0.0138224	0.131347	0.0354281	-0.0221547	-0.283238	0.0253567	0.0171512	0.0535623	0.0308282	-0.0809831	-0.0739311	-0.235579	-0.0696567	-0.079224	-0.0340157	-0.288214	0.0701982	0.177978	0.206357	0.083605	0.162347	0.247902	-0.0981167	-0.0430635	-0.0240765	0.192513	0.0192703	0.0444891	0.172483	0.139174	0.118219	-0.188268	0.112322	-0.132417	0.193827	0.109933	-0.121845	-0.0705504
TCGA.XF.A8HH.01	-0.464447	-0.0300379	0.0506166	0.151204	0.0141998	0.204876	0.118747	-0.0556463	0.0962655	0.000899349	0.0602808	0.114385	0.146255	0.142696	0.0740068	0.102274	0.0294563	0.0571286	-0.017582	-0.0325558	0.115566	-0.00082724	0.236557	-0.0222181	0.0736712	0.167532	0.079999	0.0897493	0.12751	-0.25137	0.0518426	0.0171096	0.102847	0.227102	0.0975159	0.0125971	-0.0216911	0.00349909	0.0801588	0.0516356	-0.0571528	0.178134	0.0427281	-0.19874	0.174266
TCGA.XF.A8HI.01	-0.912316	-0.0819156	0.00570364	0.104915	-0.0375832	0.0941393	0.0855487	0.039031	0.0945339	-0.0150106	0.0923089	-0.0519783	0.0701377	-0.00257396	0.138573	0.16377	0.0163665	0.148191	-0.167881	0.172127	0.0868302	-0.0639614	-0.191702	0.0989688	0.115116	0.193332	0.0928974	0.174692	0.0951312	-0.143644	0.0307462	0.063628	0.0411597	0.149626	0.108393	0.087459	0.109835	0.0951212	-0.0276866	0.0173073	-0.076571	0.0750228	0.0667694	-0.205602	-0.0568679
TCGA.XF.A9SH.01	-0.83858	0.0224416	0.218027	0.131234	0.014881	0.243827	0.152908	0.0712157	0.171249	-0.0697797	0.0627366	-0.0107111	0.0481697	0.0648491	0.0813695	0.202863	0.0804825	-0.00416482	-0.0749879	0.0114688	0.0366551	-0.0823574	-0.0680016	-0.0109301	0.208882	0.210171	0.0654422	0.0311461	-0.0632527	-0.0936941	0.024976	0.0472681	0.0553994	0.173262	0.15466	0.114277	0.192024	0.0601296	-0.112567	0.114745	-0.0333341	0.138895	0.0100673	-0.300371	0.00663443
TCGA.XF.A9SI.01	-0.341201	-0.0373229	-0.00729558	0.0509058	0.0097085	0.119871	0.0197356	0.0258144	0.131542	0.0100089	0.126507	0.101428	0.194327	0.22097	0.18772	0.189134	0.239574	0.27907	0.216221	0.323086	0.441721	0.22579	0.287199	-0.116511	0.0645481	0.00654454	0.0506336	0.103578	0.263754	-0.000871636	0.135408	0.147112	0.0607465	0.0175574	0.0322003	0.132626	0.156236	0.143535	-0.0387932	0.0505815	0.372838	0.0412972	-0.0681786	0.0734063	0.183861
TCGA.XF.A9SJ.01	-0.0975765	-0.0258	0.133861	0.191633	0.0102751	0.121721	0.0771402	-0.0384216	0.127403	0.0285942	0.148273	-0.102513	0.219342	0.0701713	0.139932	0.189169	0.0814723	0.16495	0.108413	0.136788	0.271865	0.100287	0.299302	0.0517075	0.191594	0.146003	0.0250144	0.0360443	0.198209	-0.120449	0.0356488	0.08216	0.140961	0.176735	0.0894989	0.0352113	0.153456	0.139321	0.00345468	0.119251	0.246892	0.0682282	-0.00750644	-0.0885536	0.142362
TCGA.XF.A9SK.01	-0.457247	0.0524191	0.0394503	0.115005	-0.0245797	0.146512	0.0695705	-0.0485384	0.126283	0.0176432	0.119918	-0.221762	0.182577	0.207185	0.115546	0.149906	0.0892925	0.136564	0.10914	0.21978	0.260747	0.0161559	0.318654	-0.0892706	-0.0169265	0.0103658	-0.0208292	-0.0948325	-0.0683064	-0.11837	0.165721	0.122166	0.0613619	0.0897492	0.111893	0.167135	0.125943	0.0289234	0.0420781	0.0266015	0.130928	0.0633527	-0.0600202	-0.219405	0.215555
TCGA.XF.A9SL.01	-0.265269	0.0787077	0.0645416	0.100134	-0.000600056	0.121829	0.0563134	0.0251918	0.089999	-0.0423648	0.186422	0.414428	0.25543	0.145262	0.159191	0.27921	0.231466	0.262103	0.280264	0.0680796	0.210515	0.15155	0.42169	-0.0304926	0.0237003	-0.0405449	-0.0250589	-0.10629	-0.0525815	0.0803434	0.0959686	0.213695	-0.010021	0.226737	0.0520893	0.0736813	0.271091	0.0487798	0.0218948	0.12128	0.30027	0.00894062	-0.112218	-0.122935	0.329654
TCGA.XF.A9SM.01	-0.140253	-0.0981433	0.0314878	0.137766	-0.00102647	0.08905	0.00179051	-0.0616705	0.0205844	0.00150787	0.0757491	0.0544665	0.131336	0.0399115	0.223224	0.31504	0.172466	0.174629	0.268282	0.324778	0.403757	0.15991	0.290663	0.0732452	0.240499	0.266144	0.0964672	0.200963	0.362698	-0.120035	-0.00392343	0.123222	0.239477	0.0507145	0.0869786	0.162682	0.123913	0.0877076	0.00259375	0.0553629	0.382368	0.156727	-0.0306937	-0.33341	0.040462
TCGA.XF.A9SP.01	-0.243227	0.039516	0.145772	0.12539	-0.0593185	0.0844195	0.131374	-0.0466143	0.0667357	0.00799551	0.104523	0.31726	0.250555	0.282683	0.138519	0.154792	0.133425	0.158862	0.0713611	0.0483395	0.0457991	-0.03327	0.367749	0.0488667	0.104742	0.112529	-0.0230733	0.0258645	0.0450297	0.0376167	0.0551084	0.118742	0.123319	0.229891	0.0704019	0.112155	0.193518	0.0497544	-0.0355168	0.0972501	0.084849	0.0316932	-0.0801486	-0.221454	0.272062
TCGA.XF.A9ST.01	-0.143276	-0.0694177	0.0265701	0.179098	0.0201071	0.129747	-0.003986	0.0351989	0.00668305	0.113763	0.04809	-0.0309342	0.0772661	-0.0102859	0.0318706	-0.00597614	-0.0764817	0.0336397	-0.236989	-0.1621	-0.247981	-0.0911075	-0.00631849	-0.0489986	0.403672	0.446161	0.116326	0.335602	0.443757	-0.193735	7.47395e-06	-0.0253708	0.349494	0.0890163	0.125198	0.203248	0.0477837	0.155359	-0.0678139	0.110005	-0.111637	0.316683	0.0380191	-0.120756	0.0105339
TCGA.XF.A9SU.01	-0.248252	0.0246461	0.162076	0.156292	-0.035223	0.151149	0.0811739	0.0444399	0.0589791	-0.0232418	0.139557	0.135288	0.209769	0.179	0.0950038	0.191244	0.123243	0.185303	0.136018	-0.143315	0.0151957	-0.0168426	0.337766	-0.00440994	0.252508	0.302286	0.0161831	0.0487708	0.164648	-0.049256	-0.0205936	0.0574518	0.163791	0.194875	0.10457	0.0536872	0.207726	0.10168	-0.0449667	0.0884662	0.138767	0.162709	-0.0909257	-0.154282	0.241034
TCGA.XF.A9SV.01	-0.294466	0.0442545	0.153703	0.187608	-0.0186836	0.175606	0.0903875	0.147852	0.154087	-0.0500003	0.104199	-0.0703388	0.108191	0.128513	0.0508908	0.0756836	0.0288636	0.0144503	-0.120122	-0.0291651	-0.00748078	-0.0502876	0.280998	0.241991	0.253632	0.172248	0.0685388	0.210626	0.242849	-0.216081	-0.0165748	0.0494233	0.0587276	0.195276	0.0503617	-0.015257	0.0945529	0.0655543	-0.111029	0.0970693	-0.123673	0.18178	0.14684	-0.173114	0.0438981
TCGA.XF.A9SW.01	-0.252975	0.118604	0.0858008	0.0877311	0.047288	0.0546421	0.0251584	0.101355	0.0448504	-0.0222928	0.179674	0.334409	0.204198	0.236122	0.197332	0.20042	0.23536	0.0911717	0.185687	0.0465837	0.133015	0.145516	0.469609	0.133474	0.065018	-0.0870626	0.0185168	-0.0263903	0.0388309	0.124854	0.0724014	0.18549	-0.00507283	0.201731	0.0622985	-0.0359838	0.157824	0.06609	0.0248651	0.124206	0.11524	-0.0328991	0.0013995	0.0281044	0.409372
TCGA.XF.A9SX.01	-0.169957	0.0225457	0.0176577	0.0677255	0.0231665	0.0946334	0.0294507	-0.00276262	0.109473	0.00736318	0.115648	0.0719457	0.174785	0.0409491	0.168492	0.347886	0.20535	0.124407	0.188802	0.261111	0.335317	0.0915928	0.363393	0.118015	0.189614	0.153192	0.0217364	0.0439226	0.130891	-0.115218	-0.0657295	0.11656	0.174541	0.0150689	0.0218834	0.0675526	0.218756	0.0935737	0.0536676	0.0111363	0.321513	0.11026	-0.0193502	-0.157038	0.122666
TCGA.XF.A9SY.01	-0.0974195	-0.116134	-0.0181461	0.142999	-0.0363294	0.0534643	-0.0274277	0.058392	0.0532476	-0.0269583	0.118599	-0.0212836	0.170999	0.0170278	0.120959	0.299529	0.25237	0.167654	0.321913	0.248476	0.390162	0.238306	0.38203	0.120736	0.251118	0.396325	0.153164	0.261068	0.356338	-0.171246	-0.0478285	0.112481	0.242772	0.0370594	0.0766252	0.0529633	0.19852	0.158146	-0.0537922	0.0129619	0.380313	0.193864	0.070955	-0.0518214	-0.0400538
TCGA.XF.A9SZ.01	-0.177252	0.0531376	0.0771921	0.232743	-0.00660547	0.103062	0.135023	-0.0181618	0.0336436	0.0537771	0.18255	0.0537648	0.188269	0.128802	0.102121	0.258993	0.0990913	0.190367	0.115425	-0.0777293	-0.0147874	0.0223988	0.344338	-0.0588262	0.131014	0.0861088	0.0261926	0.00858902	0.147433	-0.157831	0.0054954	0.0932696	0.186368	0.201848	0.12214	-0.0628841	0.237726	0.167303	0.0638637	0.0640848	-0.0140287	0.162546	0.00180271	-0.130015	0.192342
TCGA.XF.A9T0.01	-0.998487	-0.0602178	0.0298267	0.13332	-0.0655257	0.164043	0.055241	0.0525442	0.0334134	-0.000270578	0.0914269	-0.251847	0.0227504	0.00452599	0.0774417	0.0732549	0.0818837	0.0436731	0.0152468	-0.124852	0.0120149	-0.0498907	0.134754	0.0120257	0.271164	0.308891	0.0506104	0.108796	0.296132	-0.115418	0.00966175	-0.0257011	0.191574	0.178654	0.0667034	0.0818755	0.184769	0.113765	-0.0297113	0.0649861	0.0692786	0.229598	0.0600267	-0.165566	0.0872021
TCGA.XF.A9T2.01	-0.2663	-0.00821025	0.0690538	0.103257	0.028793	-0.0602491	0.0570846	-0.0460486	-0.0220864	0.0549282	0.0499101	0.456598	0.0991414	-0.0397434	0.084729	0.0345484	0.0643087	0.0881727	-0.0526656	-0.074712	-0.243412	-0.0171542	0.253079	0.0909193	0.290231	0.232515	0.0661163	0.2292	0.303138	0.267398	0.0982778	0.0648007	0.133426	0.085991	0.0237909	0.313494	0.0535469	0.0744478	0.0567216	-0.0273386	-0.0446109	0.148091	-0.175287	-0.0203102	0.113639
TCGA.XF.A9T3.01	-0.262118	0.0462244	0.02894	0.143248	-0.0288561	0.0928206	0.0381871	0.000924832	0.0849111	-0.0190054	0.153152	0.143488	0.208466	0.111353	0.0987423	0.252319	0.178196	0.0966726	0.10076	0.254566	0.275025	0.0244656	0.42456	0.0570111	0.151034	0.171968	0.125116	0.19235	0.275178	-0.0608086	0.0276749	0.146152	0.177159	0.131231	0.0578103	-0.0512383	0.149764	0.10188	0.0431548	0.0672532	0.173744	0.100145	-0.0254162	-0.264898	0.233466
TCGA.XF.A9T4.01	-0.112277	-0.147243	-0.0281629	0.210111	0.0345906	0.0579552	-0.00869339	0.127601	0.107295	-0.0319914	0.275656	-0.186658	0.197334	0.229888	0.143296	0.328217	0.196566	0.0749468	0.0454563	0.39244	0.241176	0.0630005	0.312693	0.233744	0.165715	0.169022	0.205968	0.210017	0.252165	0.0246887	-0.00612897	0.210478	0.173816	0.214462	0.128833	0.112732	0.11542	0.0494708	0.00815184	0.10549	0.0231457	0.187778	0.15436	-0.195344	-0.0433451
TCGA.XF.A9T5.01	-0.189926	-0.154984	0.0400041	0.137558	-0.00658614	0.0787596	0.0695779	0.0281685	0.0232647	-0.0272194	0.112274	-0.16717	0.0902585	0.104796	0.216944	0.11581	0.114734	0.0351911	0.159482	0.283524	0.406051	0.116164	0.110185	-0.0977096	0.33277	0.31914	-0.0150501	0.200358	0.36617	-0.313405	-0.0052942	0.0833347	0.299417	0.00931545	0.0558197	0.0944297	0.199366	0.156994	-0.0645796	0.0838781	0.378199	0.155075	-0.0294577	-0.119481	-0.0339491
TCGA.XF.A9T6.01	-0.077629	-0.0371345	0.0737707	0.157066	-0.0262979	0.182999	0.000460561	-0.0436111	0.0490287	0.0144111	0.132222	-0.140924	0.124378	0.078695	0.145115	0.178195	0.024807	-0.00161292	0.0461768	-0.0265199	0.173899	-0.0572351	-0.00511602	-0.0091413	0.330812	0.384803	0.0748122	0.175976	0.372559	-0.13192	0.0559378	0.0253594	0.301821	0.0788728	0.0695376	0.0792307	0.180994	0.181639	0.0207345	0.0674511	-0.0122248	0.145658	-0.0590585	-0.264027	-0.0328779
TCGA.XF.A9T8.01	-0.0968026	-0.117875	0.046327	0.168804	0.0447362	0.13617	-0.0521127	0.087596	0.0807483	-0.0196481	0.130909	0.0156529	0.121443	0.0927047	0.168627	0.277056	0.182282	0.190065	0.235983	0.389671	0.389218	0.183886	0.150991	0.0903479	0.242721	0.21183	0.0968778	0.182137	0.302959	-0.191105	-0.0697384	0.165522	0.226846	0.193789	0.119382	-0.0113613	0.275268	0.0727744	0.0915142	0.0461468	0.372575	0.165675	0.033122	-0.214177	0.0184164
TCGA.XF.AAME.01	-0.316714	0.0875183	0.00687377	0.027294	0.0551337	0.0137159	0.102982	0.0767907	0.0807665	-0.0275012	0.157963	0.407579	0.276913	0.24136	0.187827	0.335336	0.306279	0.365031	0.398533	0.11234	0.291307	0.216147	0.467395	-0.00515928	0.0065446	0.121512	0.00786852	0.0432791	0.10285	0.118585	0.149705	0.251785	0.106665	0.056208	0.0209657	0.0405632	0.199697	0.060329	0.0417469	0.0538865	0.37418	0.0368221	-0.106503	-0.0773621	0.269355
TCGA.XF.AAMG.01	-0.691965	-0.0334588	0.0531451	0.0739037	-0.00454325	0.165184	0.0750136	-0.0659904	0.0934297	0.150215	0.00163514	0.0555083	0.0513496	0.0935913	0.150652	0.0439601	0.00565767	-0.0827074	0.0839963	-0.168775	-0.189362	-0.00567113	0.173399	-0.00292833	0.191738	0.186976	0.0915476	0.221315	0.346673	-0.15918	0.0496479	-0.0152658	0.121359	0.181434	0.0673589	0.0962307	0.0360165	0.0582191	-0.0524793	-0.0110487	-0.109254	0.110466	-0.0639783	-0.0516235	0.112024
TCGA.XF.AAMH.01	-0.11887	-0.0100786	0.0281045	0.18662	0.0441583	0.188512	0.106781	-0.088649	0.0972835	0.0422505	0.0967082	0.162723	0.128619	0.106546	-0.0686435	0.0505092	0.0576422	0.106277	-0.162059	-0.00564897	-0.171954	-0.0575605	0.154306	0.0687428	0.273941	0.24867	-0.0211717	0.0889831	0.144772	0.244581	0.0583565	0.0116067	0.164983	-0.00792297	0.055186	0.30395	0.119759	0.147036	0.0482771	0.0289835	-0.0817982	0.169743	-0.0244457	0.0895488	0.20736
TCGA.XF.AAMJ.01	-0.335829	-0.0827899	0.129674	0.187853	-0.00378054	0.147122	0.113408	0.0274207	0.0959187	-0.0156875	0.0976647	0.131182	0.229091	0.181901	0.105434	0.252284	0.21379	0.28702	0.148011	0.145883	0.140541	-0.0144352	0.464208	0.178308	0.0261883	0.106147	0.0763342	0.0169517	0.0230711	0.169093	0.0132529	0.0860899	0.0970395	0.221326	0.0478397	0.233552	0.152854	0.0431974	-0.0710105	0.0380071	0.0405274	0.1029	-0.0731166	-0.247662	0.238794
TCGA.XF.AAML.01	-0.320414	-0.0668499	0.136585	0.180017	0.0231524	0.0509745	0.15939	0.0557688	0.199232	0.122495	-0.0950488	-0.270502	0.0274486	0.133951	0.0500226	0.142502	0.0431437	0.0336563	-0.119021	0.143589	0.121686	0.027295	-0.105938	-0.0571402	0.21152	0.177431	0.152798	0.232378	0.378197	-0.270441	0.0186992	-0.0468224	0.184915	0.097557	0.105689	0.146666	0.0316085	0.161911	-0.139258	0.0437912	0.0586716	0.203441	0.0212261	-0.21737	-0.0462713
TCGA.XF.AAMQ.01	-0.251058	-0.0112362	0.0469642	0.108276	0.0460226	0.197614	-0.00667813	0.174878	0.15407	-0.0258101	0.00303475	-0.163583	0.0959996	0.181557	0.107872	0.100598	0.191536	0.168478	0.0732422	0.266652	0.363174	0.0809723	-0.1439	0.179213	0.205926	0.208531	0.18473	0.280799	0.327363	-0.146677	0.0770654	0.122333	0.129987	0.137764	0.148717	0.115664	0.0782937	0.0741965	-0.131026	0.012981	0.257814	0.118603	0.0824451	-0.154966	-0.0506282
TCGA.XF.AAMR.01	-0.388317	0.0530315	0.0857312	0.108233	0.0416866	0.153944	0.111091	0.119316	0.137043	-0.0170258	0.147492	0.192913	0.219239	0.224667	0.0731588	0.150435	0.0677737	0.195003	0.0884375	-0.115985	0.0645711	0.0719681	0.288886	-0.0377351	-0.139316	-0.175134	0.0855295	0.0831621	0.0768445	0.154776	0.0626837	0.208946	-0.0391522	0.0558005	0.177801	0.0251583	0.0278373	0.01859	0.0789694	0.0795873	-0.0168829	-0.0188582	0.0871672	-0.192923	0.303007
TCGA.XF.AAMT.01	-0.281307	0.0547381	-0.110857	0.142578	-0.0111202	-0.00135278	0.0153277	0.00350493	-0.0713877	-0.0198865	0.1483	-0.0101477	0.228499	0.0946934	0.116391	0.209701	0.166071	0.29488	0.180574	0.225407	0.163344	0.119971	0.429435	0.0119584	0.0902041	0.2598	0.0978553	0.190051	0.160312	-0.125613	0.0421808	0.154462	0.0994445	0.0242754	0.0737852	0.113384	0.0230902	0.0155579	0.0112268	-0.00477119	0.0774182	0.0587332	0.0463142	-0.0783996	0.123296
TCGA.XF.AAMW.01	-0.242232	-0.148043	-0.0412892	0.142541	0.0141454	0.102454	-0.000215181	0.00266938	0.0627417	-0.0147	0.176563	-0.173388	0.178985	0.104316	0.139485	0.249591	0.143531	0.212611	0.190441	0.35471	0.253211	0.092605	0.299741	0.147783	0.177094	0.335273	0.200979	0.238147	0.286756	0.0743772	-0.0167941	0.191814	0.280258	0.0165078	0.172433	-0.0581517	0.0435308	0.136558	0.0433078	0.053943	0.0177423	0.213024	0.138673	-0.134837	-0.0619832
TCGA.XF.AAMX.01	-0.8021	-0.00719846	-0.0425229	0.203913	0.0183497	0.080421	0.0627951	0.0771505	0.146217	0.0686404	0.000819009	-0.253722	0.0425711	0.0441823	0.117215	0.107281	-0.0692406	0.0770707	-0.138372	-0.196541	-0.0601619	-0.0444317	0.0833614	-0.156068	0.120245	0.179405	0.137004	0.230438	0.316007	-0.233769	-0.0069304	-0.0259327	0.0980493	0.161621	0.139777	-0.0626962	0.0108997	0.0426029	-0.0330892	0.0622581	-0.122629	0.165609	0.103375	-0.325384	0.0115515
TCGA.XF.AAMY.01	-0.453447	-0.0655493	0.0537324	0.170981	0.0303409	0.0268378	0.0949198	0.135783	0.105607	0.0794919	0.105034	-0.000527506	0.191831	0.217152	0.102593	0.229261	0.054538	0.0996648	0.0750927	-0.0632019	-0.039338	0.0386682	0.199661	0.123188	0.0190387	0.0910128	0.0803501	0.172735	0.134295	-0.0731635	0.0699285	0.0722838	-0.00872855	0.267399	0.107395	0.100238	0.0105574	0.0269209	-0.158131	0.0531688	-0.110683	0.123766	-0.02048	-0.0564433	0.139093
TCGA.XF.AAMZ.01	-0.417923	-0.0327484	0.0878047	0.108364	-0.0364573	0.225616	0.122145	0.104234	0.119718	0.0229246	-0.0122638	0.0179987	0.0622494	0.109667	-0.0363928	0.142335	0.0673797	0.0678075	-0.08779	-0.230538	-0.0781867	0.0229665	-0.0682711	0.0345892	0.321661	0.371097	0.132824	0.25605	0.401302	-0.13948	0.0469118	0.0107882	0.144745	0.121822	0.128924	0.075171	0.133678	0.139971	-0.225127	0.0539561	0.0693289	0.18732	0.0259401	-0.168191	0.0275961
TCGA.XF.AAN0.01	-0.230517	0.0570166	-0.0362751	0.191952	0.0114065	0.0637111	0.0953067	0.133951	0.167952	0.0362035	-0.0273178	-0.204772	0.0766086	0.246655	0.0554619	0.207146	0.0577997	0.139267	0.19594	0.118522	0.231349	0.0562724	-0.0617062	-0.0624071	0.0624254	0.0585722	0.163235	0.198121	0.24206	0.0150052	0.042731	0.0695945	0.116366	0.129339	0.135519	0.106365	0.141745	0.0824682	-0.0188685	0.0321237	0.176346	0.0992954	0.12955	-0.136922	0.00338773
TCGA.XF.AAN1.01	-0.453925	-0.0837067	0.0779892	0.154533	-0.0453894	0.196072	0.128979	0.0720272	0.152245	-0.0371798	-0.0151359	-0.194594	0.076238	-0.0268144	0.132048	0.0610025	-0.0547168	-0.03619	-0.203435	0.191792	0.070683	-0.0344619	-0.19027	-0.0368215	0.262925	0.291361	0.0577132	0.159232	0.244282	-0.171949	0.0070609	0.0584446	0.142289	0.016762	0.0786332	0.0879309	0.163949	0.147315	-0.0854999	0.0681088	-0.101605	0.125707	-0.0237302	-0.151029	0.00209817
TCGA.XF.AAN2.01	-0.181036	-0.0907797	-0.00513001	0.127077	0.0157484	0.133125	0.0103184	0.054501	0.140273	0.00509768	-0.0156919	-0.141955	0.0921128	0.123293	0.0994819	0.142081	0.0907445	-0.0121175	-0.00136875	0.370264	0.3859	0.0823409	-0.0530404	-0.00614083	0.290458	0.284801	0.14065	0.286145	0.36628	-0.266357	0.0059159	0.0757168	0.261632	-0.0413025	0.118122	0.0708903	0.124341	0.160803	-0.10581	0.110429	0.18401	0.110879	0.155042	-0.174433	-0.113567
TCGA.XF.AAN3.01	-0.294911	0.0159177	-0.00306915	0.200404	0.0785582	0.125136	0.0765959	0.0752585	0.167997	-0.051335	0.174982	-0.362119	0.197644	0.199463	0.130254	0.215537	0.109944	0.13321	0.12852	0.264575	0.0507019	0.0694774	0.271337	0.141238	0.173663	0.0755044	0.117248	0.0467235	-0.0684607	-0.186265	0.0546555	0.180734	0.0352817	0.221924	0.188994	0.0610825	0.249384	0.00794349	0.0443436	0.132932	0.0787475	0.106051	0.0972887	-0.364331	0.129728
TCGA.XF.AAN4.01	-0.317987	0.091343	0.0148766	-0.106325	0.0621163	-0.0582063	-0.025238	0.165267	0.0269362	-0.0654528	0.194161	0.35152	0.225459	0.203599	0.17652	0.343626	0.29313	0.170685	0.344731	0.250629	0.418198	0.207702	0.437076	0.179478	0.0367196	0.0992253	0.0935794	0.0312279	-0.0178505	0.186632	0.0181059	0.234075	0.0603271	0.0494031	0.102435	-0.0458732	0.256088	0.0847934	0.02349	0.107622	0.333121	0.0168732	-0.000348079	-0.194852	0.287068
TCGA.XF.AAN5.01	-0.197707	-0.0843429	0.00163761	0.118348	0.0317169	0.0661706	-0.0081905	0.114879	0.0802448	-0.01331	0.113377	-0.360696	0.163848	0.023577	0.0729099	0.255202	0.150645	0.00289393	0.226702	0.395308	0.33948	0.121176	0.0560487	0.101383	0.319409	0.224492	0.0854637	0.262883	0.374834	-0.222288	-0.00377429	0.114099	0.272984	0.117243	0.0760872	0.0190208	0.157718	0.0454414	0.0784491	0.0609846	0.290694	0.119234	0.0847089	-0.149354	-0.104104
TCGA.XF.AAN7.01	-0.191843	-0.119712	0.0112841	0.0560235	-0.0375554	0.068017	-0.00543194	0.0546642	0.0070326	0.0592474	0.0579118	0.133739	0.0985139	0.0501753	0.139656	0.0778054	0.0658327	0.15105	-0.113842	0.0252402	-0.0395921	0.00251901	0.283468	0.100293	0.269302	0.182156	0.163599	0.33627	0.415592	0.0718088	-0.00504444	0.0755269	0.0827506	0.0861958	0.130584	0.0303525	-0.0199753	0.124725	-0.178541	-0.0316876	-0.103818	0.175461	-0.00344696	-0.0228507	0.135039
TCGA.YC.A89H.01	-0.260498	-0.048074	0.122252	0.1943	-0.0512647	0.189794	0.0463016	0.000832834	0.0930092	-0.0743441	0.114799	-0.159518	0.117207	0.11283	0.0245447	0.181528	0.0698208	-0.05889	-0.0629531	0.0724185	-0.0133011	-0.0412626	0.0633251	0.0104455	0.315586	0.314553	0.0576294	0.221849	0.305703	-0.150537	0.0125613	0.0499538	0.165496	0.0372383	0.155776	-0.0637188	0.165191	0.128772	-0.0915046	0.137949	0.0113441	0.177486	0.0701956	-0.187395	0.0156855
TCGA.YC.A8S6.01	-0.408436	0.00945716	0.0407358	0.0380936	0.0987769	0.077205	0.0788412	0.0424016	0.162738	-0.112071	0.153749	0.273605	0.276435	0.204421	0.122373	0.465627	0.30004	0.274678	0.306487	0.136825	0.0234565	0.0761982	0.327556	0.196479	0.120537	0.207128	0.122991	0.0547446	0.0331148	0.155299	0.0680974	0.198667	0.0591761	0.125576	0.142481	0.0625267	0.205538	0.0529892	-0.00327912	0.0566162	0.160111	0.053465	-0.0580564	-0.193997	0.199237
TCGA.YC.A9TC.01	-0.3736	-0.051269	0.117512	0.163816	0.0137165	0.188438	0.0468672	-0.0183598	-0.034377	0.0886678	0.0539067	-0.1915	0.00428784	0.105363	0.0984158	0.112825	0.0668422	0.0757616	-0.223765	-0.0733117	-0.181661	0.00866764	-0.0574425	-0.0944215	0.366395	0.377659	0.0482162	0.230509	0.320608	-0.055512	-0.010007	-0.0969562	0.317787	-0.150067	0.176381	0.00804381	0.331761	0.173925	-0.0910954	0.00950066	-0.0873545	0.171537	-0.015466	-0.00147171	-0.0178541
TCGA.YF.AA3L.01	-0.404106	0.0938028	0.170695	0.117073	0.0686852	0.289892	0.182049	0.0113169	0.117641	0.0258562	0.0315157	0.0309858	0.0984964	0.0226054	0.11152	0.0795881	0.032418	0.160053	-0.232639	0.00779979	-0.156877	-0.0688804	-0.206848	0.108512	0.200779	0.16064	0.0501066	0.0632698	0.0734826	-0.165707	0.00350057	-0.0388563	0.056625	0.0282711	0.15564	0.128115	0.247073	0.121125	0.153779	0.0759027	-0.100301	0.115365	-0.0179002	-0.235072	0.0735136
TCGA.YF.AA3M.01	-0.188651	0.00104088	-0.0278234	0.151999	-0.00212652	0.178247	0.0728885	0.0754513	0.0997183	0.030835	0.0778141	-0.0734975	0.130807	-0.10031	0.0834801	0.22615	-0.0303395	0.135189	-0.204048	0.129594	-0.0888798	-0.0633246	-0.102351	-0.0393949	0.31015	0.351011	0.172273	0.308881	0.418433	-0.261477	0.039933	-0.0205006	0.212594	0.0233169	0.156018	0.154131	0.183337	0.135513	-0.0284821	0.101931	-0.104093	0.163107	-0.0699142	-0.118499	0.0262341
TCGA.ZF.A9R0.01	-0.575504	-0.0400443	0.135417	0.179713	-0.0402151	0.138354	0.176909	-0.0359478	0.0688915	-0.0232521	0.0791135	0.074871	0.0740576	0.164949	0.0407849	0.116427	-0.00704935	0.0689598	-0.0977724	0.100573	0.0809582	-0.0136784	0.101103	-0.0555741	0.127089	0.178253	0.0694463	0.121616	0.128833	-0.13804	0.0697112	0.0247806	0.175909	0.124801	0.0683817	0.0970673	0.0286628	0.052932	0.137185	0.0563154	-0.0391938	0.0982639	-0.0104262	-0.187762	0.182707
TCGA.ZF.A9R1.01	-0.553233	-0.17592	0.025951	0.217709	-0.00959932	0.214322	0.0867766	0.0785701	0.123695	-0.0316098	0.0746649	-0.285026	0.141352	0.106625	0.0896141	0.125994	-0.0138094	0.0816145	-0.15033	-0.00860341	0.0280894	0.0623415	-0.0126599	0.067599	0.12431	0.241913	0.141836	0.226764	0.309784	-0.0671246	0.10014	0.0751855	0.11588	0.0496853	0.156769	0.0439748	0.155518	0.110358	-0.0486824	0.0463595	-0.113649	0.112367	0.0565648	-0.163473	0.100718
TCGA.ZF.A9R2.01	-0.335794	-0.14065	-0.00382806	0.133468	0.013057	0.155544	0.0506496	0.105557	0.123155	-0.00727801	0.077243	-0.248684	0.0442758	-0.011013	0.0954216	0.119834	0.0156206	0.017236	-0.179517	0.0238282	-0.0431999	-0.0541623	-0.193316	0.191263	0.23724	0.315462	0.175158	0.298925	0.271342	-0.150924	0.0578143	0.0576774	0.128707	0.0284038	0.174323	0.138949	0.131266	0.135727	-0.0700979	0.0430988	-0.122827	0.139249	0.0692287	-0.265309	-0.0426748
TCGA.ZF.A9R3.01	-0.727517	0.10468	0.0760898	0.163593	0.0514975	0.223359	0.0988252	0.112553	0.169779	0.00601904	0.05318	-0.282318	0.00532638	0.0611171	0.115573	0.154925	0.0213454	0.110867	-0.0951883	0.326028	0.190348	-0.0342853	-0.203584	0.064421	-0.0178036	0.00970258	0.0605209	0.131265	0.104627	0.04593	0.0426863	0.0633511	0.139127	0.150276	0.109616	-0.00866442	0.110044	0.0776722	-0.0707347	0.116398	-0.0666752	0.157196	0.129765	-0.280518	-0.0268856
TCGA.ZF.A9R4.01	-0.77045	0.0290615	0.102064	0.141943	0.0397452	0.140769	0.0592074	0.0829719	0.106437	0.0563574	-0.0210048	-0.0762	-0.0234234	0.0182467	0.0736488	0.0437128	0.0223012	0.097743	-0.17043	0.119342	0.246407	0.00475385	-0.226316	0.0710479	0.278197	0.292725	0.0983436	0.217574	0.215194	-0.165151	-0.0589927	-0.036932	0.0963461	0.114909	0.129338	0.155256	0.0497158	0.0494362	0.0227552	0.0979746	0.0525624	0.166838	0.0873262	-0.239723	-0.101862
TCGA.ZF.A9R5.01	-1.12082	0.00966826	0.109188	0.09525	0.011688	0.0893601	0.0514843	-0.039597	0.0314671	-0.00971876	0.00815213	-0.184748	0.009815	-0.0111419	0.0909394	-0.00877652	-0.0280152	-0.0309535	-0.172573	0.242309	0.0428614	-0.071245	-0.242911	0.0517541	0.176388	0.220616	0.0268694	0.0789642	-0.062323	-0.077419	0.00400438	-0.0036346	0.062576	-0.00848698	0.107525	0.0319122	0.0439593	0.0177137	-0.171964	0.0502908	-0.0270118	0.0904176	0.0851739	-0.155743	-0.116631
TCGA.ZF.A9R7.01	-0.928796	0.000738332	0.00144728	0.0540543	0.0127602	0.120386	0.106444	0.0123097	0.120453	0.0236137	-0.00358271	-0.383597	0.0699022	0.236508	0.125542	0.158037	0.0556348	0.0670666	0.055839	0.345196	0.386249	0.0432851	-0.312919	0.00761585	-0.0440137	-0.0624396	0.035668	0.0734755	0.0516166	-0.292279	0.128581	0.0415198	-0.018685	0.0126978	0.0452648	-0.00483022	0.0467658	-0.0450873	-0.0630221	-0.0382078	0.306165	-0.0369685	-0.0882365	-0.261656	-0.00480119
TCGA.ZF.A9R9.01	-0.669329	0.198409	0.126202	0.0880011	0.00735355	0.214966	0.181304	0.00321935	-0.0799628	0.0405091	0.0528347	0.105283	0.155939	0.160711	0.19678	0.209416	0.121477	0.150759	0.0692651	0.0548523	0.092514	0.00497585	0.353967	0.0435541	0.0574474	0.0460817	0.0552066	-0.0321457	-0.0761436	0.13739	-0.0225623	0.0619516	0.0031419	0.141295	0.0307501	0.184475	0.0666376	0.0319207	0.0849571	0.0656365	0.0771923	0.069148	-0.0537255	-0.245559	0.215474
TCGA.ZF.A9RC.01	-0.942415	0.0381658	0.0276277	0.114825	-0.0269803	0.216118	0.183104	0.0195616	0.12397	0.0187371	0.130401	0.137795	0.174573	0.0861038	0.18921	0.0442649	0.059441	0.130159	-0.130244	-0.0834353	-0.116766	-0.0214728	0.285387	0.041509	0.0768069	0.103391	0.102682	0.0976952	0.17259	-0.147145	0.102921	0.0287907	0.0546599	0.119243	0.0774794	0.248023	0.0746441	0.0799248	0.192903	0.0368922	-0.104931	0.0515876	-0.101958	-0.11002	0.219874
TCGA.ZF.A9RD.01	-0.0735638	-0.0421246	0.037977	0.142109	0.0423725	0.0838656	0.0987732	0.0774454	-0.011896	0.0133315	0.133992	-0.147276	0.158544	0.209508	0.224962	0.308117	0.190103	0.193776	0.260855	0.33179	0.33699	0.150965	0.170261	0.0355338	0.316215	0.302803	0.0437939	0.186243	0.276734	-0.0781932	0.0481518	0.120593	0.275192	-0.0277007	0.111701	0.0259718	0.209069	0.0720548	0.0512183	0.0947653	0.351184	0.12885	0.0420795	-0.0316605	-0.00402544
TCGA.ZF.A9RE.01	-0.182854	-0.0924422	0.0801436	0.15539	0.0583899	0.182208	0.115354	0.0995822	0.131722	0.0280037	0.0972462	-0.155561	0.112318	0.10753	0.0894959	0.0368484	-0.00468183	-0.0496438	-0.00845213	0.152499	0.061708	-0.0312613	-0.27049	0.0830742	0.145148	0.296071	0.155702	0.255676	0.323966	-0.267476	0.0386361	0.0664394	0.199579	0.0233546	0.168471	0.0190457	0.15275	0.0757856	0.00272462	0.129058	-0.123559	0.178043	0.0972743	-0.293366	-0.0824523
TCGA.ZF.A9RF.01	-0.154213	-0.069958	-0.0275636	0.125545	0.0247435	0.0932716	0.0137005	0.0557164	-0.0592982	0.0436682	0.103044	0.249556	0.0291301	-0.114568	0.075708	0.209968	0.169083	0.133026	0.113986	0.0818824	0.258855	0.0638298	0.166344	0.0796789	0.24124	0.236677	0.1185	0.223877	0.377677	-0.423993	-0.056001	0.0529996	0.216615	-0.118326	0.0727914	0.0610758	0.131042	0.129471	0.0131305	0.000695031	0.374918	0.174979	0.0054505	-0.176783	0.0173862
TCGA.ZF.A9RL.01	-0.96925	-0.00849022	0.0950226	0.0637475	0.0194951	0.148333	0.156591	0.165813	0.165117	0.022802	0.0125654	-0.279881	-0.0274707	0.0406273	0.0333055	0.0355334	0.0314135	0.0372306	-0.157402	0.00520395	-0.00459023	-0.0210581	-0.338865	0.103873	0.156305	0.0710181	0.113055	0.232669	0.271697	-0.066742	0.0393639	0.00319189	0.174855	0.0247689	0.181764	0.101471	-0.0181439	0.0186159	-0.0796449	0.0753985	-0.174585	0.0902923	0.11272	-0.234845	-0.0279629
TCGA.ZF.A9RM.01	-0.740441	0.12611	0.183372	0.144545	0.0487071	0.181027	0.207619	0.0598675	0.158657	0.0707337	0.126336	0.0426022	0.0205503	0.16046	0.131636	0.0242414	-0.015647	0.162757	-0.19564	-0.0247024	0.005627	0.00410773	-0.23555	0.0237596	0.115144	0.202152	0.117845	0.267766	0.347352	-0.0339257	0.028786	-0.0363971	0.0848036	0.183831	0.117064	0.059748	0.0674772	0.121185	0.232887	0.105378	-0.131611	0.12742	0.0529141	-0.154897	-0.0655145
TCGA.ZF.A9RN.01	-0.220451	-0.00964477	0.0665906	0.115598	0.0277054	0.0492811	-0.0193079	0.111809	-0.0153078	0.072702	-0.00331229	-0.336429	0.113873	-0.012885	-0.037598	0.0829358	0.0790623	-0.129719	-0.0870059	0.0270723	0.129528	0.0726172	-0.11174	0.0532418	0.359032	0.282554	0.153199	0.275617	0.429911	-0.172349	-0.0334475	0.00284832	0.324285	0.0914923	0.132652	0.03818	-0.0105474	0.148761	-0.142172	0.0296087	0.219066	0.215882	0.0561933	0.00898918	-0.124544
TCGA.ZF.AA4N.01	-0.226438	0.0669762	-0.0328224	0.148219	0.034108	0.0109642	0.0780142	0.0580236	-0.0659325	-0.0482644	0.13138	-0.0693904	0.127802	0.149383	0.165518	0.322425	0.137198	0.204303	0.174775	0.189671	0.0364566	0.0837304	0.235852	0.13771	0.309195	0.403405	0.177623	0.262004	0.379908	0.0625509	-0.0215089	0.0381368	0.178976	-0.0542074	0.126112	0.0807738	0.148376	0.106282	0.109281	0.0648722	0.0924146	0.170065	0.0415626	-0.0291115	-0.0696286
TCGA.ZF.AA4R.01	-0.368745	0.0206622	-0.0468273	0.141217	-0.00806985	0.193066	0.00215724	0.00763236	0.112594	0.076823	0.0784383	-0.0309855	0.185536	0.146788	0.162178	0.049399	0.101396	-0.0491487	-0.0489375	-0.0734909	0.0746002	0.0550457	0.379923	0.1241	0.115428	-0.0396946	0.106356	0.244693	0.326348	0.0581678	0.150482	0.0972473	0.120938	0.0401673	0.123028	0.130489	0.0559415	0.0573261	0.00503869	-0.0353336	-0.0661228	0.0868453	-0.0407669	-0.117474	0.167599
TCGA.ZF.AA4T.01	-0.310897	-0.0136763	0.119188	0.165787	0.00136371	0.217731	0.16996	0.115357	0.0305325	0.0684911	0.00145219	-0.0998155	0.0416388	0.0260896	0.0843336	0.192284	0.0141891	-0.0356534	-0.0598922	0.236364	0.0869691	-0.00720747	-0.157493	0.0176313	0.244028	0.310752	0.170589	0.25467	0.369516	-0.307857	-0.0260903	-0.0190501	0.22699	0.152177	0.15551	0.0421776	0.217814	0.127969	0.0186026	0.0767613	-0.0592146	0.159885	0.00556886	-0.159387	-0.0336958
TCGA.ZF.AA4U.01	-0.598199	-0.115139	0.0487688	0.144137	-0.0119911	0.159685	0.13625	0.0374638	0.0977639	0.0337331	0.0267716	-0.186652	0.0609985	-0.0489378	0.188376	0.0869725	0.0310804	0.12057	-0.283825	0.153734	0.0400445	-0.0531251	-0.18574	0.0850554	0.294025	0.321432	0.110221	0.126093	0.204183	-0.229921	-0.00779617	0.037745	0.174575	0.0283113	0.139953	0.0873828	0.193084	0.142522	0.0307085	0.0899428	-0.0571438	0.177638	0.134	-0.183335	-0.0632782
TCGA.ZF.AA4V.01	-0.281548	-0.0666053	-0.0536407	0.150607	-0.00575672	0.188751	-0.0151011	-0.00338454	0.0693358	0.00303479	0.0312652	-0.294322	0.0589568	0.0780044	0.0666759	0.172487	0.0829741	0.0221943	-0.0160363	0.104921	0.224365	0.0918886	0.203145	0.059885	0.333158	0.343183	0.0480191	0.194205	0.342813	-0.235854	0.0296695	-5.3332e-05	0.286296	0.109268	0.106684	0.0980461	0.101537	0.0887302	0.00192138	0.0462101	0.203976	0.112707	-0.0298524	-0.205446	0.0127565
TCGA.ZF.AA4X.01	-0.864471	0.127086	0.139712	0.121672	0.082037	0.206777	0.240035	0.0543359	0.159887	0.0911669	0.0499583	-0.156431	0.0550153	0.180822	0.0968261	0.0314076	-0.040985	0.0801448	-0.0494438	0.113361	0.116286	-0.0580342	-0.336944	0.00837285	0.0483267	-0.0944197	0.147631	0.237805	0.347475	-0.12124	0.0474443	0.021552	0.0363814	0.0103473	0.0825568	0.0617589	0.0789157	0.106165	0.170993	0.0236587	-0.132864	0.0176596	0.0282201	-0.25016	-0.0740451
TCGA.ZF.AA51.01	-0.327784	0.0550864	0.0771849	0.116223	-0.067396	0.142295	0.153735	0.020616	0.0410588	-0.0358887	-0.0144455	0.121854	0.125415	0.121679	0.123129	0.277519	0.179539	0.0853532	0.207147	0.117221	0.222727	0.0994623	0.209383	0.101404	0.258619	0.172781	0.117204	0.0776921	0.230201	-0.109496	-0.0346994	0.121281	0.147423	0.216758	0.119412	0.13403	0.210588	0.0883327	0.0404614	0.0529166	0.311489	0.13256	-0.0348259	-0.293274	0.0764582
TCGA.ZF.AA52.01	-0.282305	-0.0151623	0.095645	0.17327	0.0253886	0.100894	0.0764518	0.0886145	0.0487276	0.0338932	0.081275	0.156665	0.172887	0.184828	0.122562	0.282011	0.144909	0.118991	0.155686	0.0174515	0.120033	0.0233413	0.365761	0.014706	0.0918644	0.0557258	0.0723261	0.0376184	0.126304	-0.0145743	0.0401525	0.0830601	-0.0240305	0.0748881	0.100883	-0.0132411	0.208221	0.10712	-0.0104925	0.0338452	0.0732175	0.07375	-0.0287645	-0.248683	0.240543
TCGA.ZF.AA53.01	-0.113388	-0.00566235	0.054104	0.146658	0.0166613	0.130643	0.0866507	0.0458505	0.0289159	0.0187667	0.162082	0.205657	0.160054	-0.105016	0.167843	0.208208	0.124429	0.270642	0.20009	0.342815	0.258057	0.0891431	0.376954	0.0517687	0.226807	0.240553	0.028856	0.112107	0.219347	0.0655822	0.0015103	0.1306	0.270076	0.0534939	0.0804758	-0.0706677	0.219669	0.151649	0.0802003	0.0970617	0.23842	0.181219	0.104181	-0.0567128	0.110002
TCGA.ZF.AA54.01	-0.247246	-0.104666	-0.0482781	0.107596	-0.0171702	0.055115	-0.0788171	0.050073	-0.055242	0.051779	0.145343	0.139398	0.111758	-0.209625	0.15381	0.147172	0.200436	0.314965	0.153357	0.170695	0.293574	0.201452	0.318774	0.074024	0.270772	0.384241	0.123539	0.227825	0.372658	-0.0371931	-0.075129	0.147124	0.302515	0.0883868	0.042412	-0.0386009	0.127656	0.25388	-0.125409	0.0654381	0.292281	0.269991	0.049421	-0.115751	0.0224017
TCGA.ZF.AA56.01	-0.149785	-0.114942	0.124798	0.182202	0.0195564	0.0891882	0.135051	0.0788525	0.112614	-0.0345971	0.138877	-0.163285	0.179952	0.111796	0.157652	0.285826	0.188913	0.182572	0.267078	0.353169	0.258058	0.167981	0.131949	0.118952	0.247696	0.24892	0.113881	0.239821	0.283803	-0.0983468	0.0362303	0.221479	0.212862	0.0177277	0.151861	0.105808	0.227574	0.0882293	0.0364562	0.0715353	0.192271	0.160393	0.0885678	-0.236794	-0.00558852
TCGA.ZF.AA58.01	-0.146754	-0.119	0.000786747	0.0720957	0.0142274	0.0154529	-0.0172585	0.0349448	0.0106639	0.0352391	0.187561	-0.0511459	0.180746	-0.0335691	0.146517	0.277819	0.243723	0.20091	0.34634	0.47511	0.417378	0.146902	0.365636	0.107328	0.249448	0.254194	0.130552	0.207905	0.365911	-0.105874	-0.0697794	0.0746624	0.227865	0.0998877	-0.00436855	0.0384089	0.228549	0.139953	-0.0720633	-0.0145988	0.387318	0.140401	0.0220036	-0.0874623	0.101431
TCGA.ZF.AA5H.01	-0.12749	-0.0554357	0.00111075	0.137629	0.0268191	0.0544236	-0.0110986	0.0372858	0.0807698	0.0157026	0.145372	-0.0845757	0.129857	0.159369	0.146792	0.214603	0.208118	0.0749476	0.128047	0.256719	0.304537	0.130524	0.279114	0.186352	0.147753	0.10935	0.213175	0.264971	0.36876	-0.159596	-0.0698482	0.183241	0.223211	0.0077267	0.11421	0.186279	0.14133	0.11692	-0.0354311	-0.0235811	0.256559	0.132145	0.121814	-0.348092	0.0555082
TCGA.ZF.AA5N.01	-0.215009	0.0492988	0.0996442	0.213627	0.0384457	0.155464	0.0689009	0.064768	0.0611842	-0.0118803	0.198138	-0.239032	0.117453	0.0278693	0.00509071	0.123405	-0.0175343	0.0135181	-0.20025	0.0855514	-0.00937559	-0.0433119	-0.0977573	0.114606	0.350364	0.367201	0.078598	0.156047	0.228035	-0.203314	-0.0215068	-0.0448932	0.206269	0.0802105	0.125579	-0.0721863	0.193427	0.144477	0.0240956	0.153014	0.0540588	0.25801	0.100157	-0.16167	0.0280407
TCGA.ZF.AA5P.01	-0.480321	-0.00443615	0.0122552	0.0506757	0.00349835	0.0986519	0.119338	0.0717847	0.0175651	0.0247469	0.110946	0.317416	0.230251	0.0565101	0.153956	0.439581	0.249913	0.0834271	0.213324	0.169147	0.225265	0.0843661	0.37138	0.00428606	0.0413683	0.185808	0.0776882	0.0176108	0.0924895	-0.103975	0.0808572	0.149557	0.116286	0.0609964	0.0906792	0.105062	0.151602	0.0978088	0.0279952	0.0820594	0.112415	0.117549	-0.125706	-0.252674	0.311006
